# Supplementary material
Source: publisher figshare collection journal article supplement (https://acs.figshare.com/ndownloader/files/16869893)

## **Supporting Information**

### **Is Fe-catalyzed *ortho* C-H arylation of benzamides sensitive to steric hindrance and directing group?**

Yi-Ming Wei,<sup>‡</sup> Meng-Fei Wang<sup>‡</sup> and Xin-Fang Duan\*

College of Chemistry, Beijing Normal University, Beijing 100875, China

xinfangduan@vip.163.com

## Table of contents

|                                                                                                                         |     |
|-------------------------------------------------------------------------------------------------------------------------|-----|
| 1. General information                                                                                                  | S3  |
| 2. General remarks for the preparation of aryl Grignard reagents                                                        | S3  |
| 3. Preparation of <b>Ti-1</b>                                                                                           | S3  |
| 4.1 Typical procedure for <i>ortho</i> C-H arylation of benzamides using common Grignard reagents ( <b>2a</b> )         | S4  |
| 4.2 Typical procedure for <i>ortho</i> C-H arylation of benzamides using functionalized Grignard reagents ( <b>2u</b> ) | S4  |
| 5. Preparations of <b>4a</b> and <b>4b</b>                                                                              | S5  |
| 6. Preparation of <b>4c</b>                                                                                             | S6  |
| 7. Preparation of <b>4d</b>                                                                                             | S6  |
| 8. Table S1 Condition optimization                                                                                      | S7  |
| 9. Characterization data                                                                                                | S8  |
| 10. References                                                                                                          | S26 |
| 11. <sup>1</sup> H and <sup>13</sup> C NMR spectra for products                                                         | S27 |

## 1. General experimental details

$^1\text{H}$  NMR (400, 500 or 600 MHz) and  $^{13}\text{C}$  NMR (100, 125 or 150 MHz) spectra were recorded on Bruke 400 Hz or 500 Hz and JNM-ECE 400R or 600R spectrometers unless otherwise noted. The chemical shifts ( $\delta$ ) were quoted in parts per million from tetramethylsilane for  $^1\text{H}$  and  $\text{CDCl}_3$  for  $^{13}\text{C}$  spectroscopy. ESI mass spectra were recorded on TRACE MS spectrometer. High resolution mass spectra (HRMS) were obtained with a Bruker microTOF (ESI). Infrared data were acquired using an AVATAR 360 FT-IR spectrophotometer. Elemental analysis was carried out with an Elementar Vario instrument. Melting points were recorded on a TECH X-4 microscopic instrument and uncorrected.

## 2. General remarks for the preparation of aryl Grignard reagents

All reagents and solvents used for aryl magnesium reagents or lithium reagents and reactions were freshly dehydrated before use. The corresponding glassware was oven dried ( $120\text{ }^\circ\text{C}$ ) and cooled under a stream of argon gas.

Common aryl Grignard reagents such as phenyl magnesium or 4-methoxyphenyl magnesium bromides were prepared according to standard procedure. Functionalized aryl Grignard reagents such as 2-cyanophenyl magnesium chloride or 4-(ethoxycarbonyl)phenyl magnesium chloride were prepared *via* iodine-magnesium exchange using *i*-PrMgCl·LiCl according to Knochel's method.<sup>[1]</sup> All the Grignard reagents were titrated before use.<sup>[2]</sup>

## 3. Preparation of Ti-1<sup>[3]</sup>

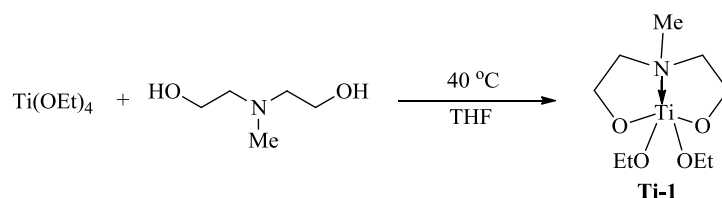

Under Ar atmosphere,  $\text{Ti}(\text{OEt})_4$  (34.2 g, 150 mmol) was dissolved in 100 mL THF. Under stirring, *N*-methyldiethanolamine (17.9 g, 150 mmol) was added dropwise. The mixture was stirred at  $40\text{ }^\circ\text{C}$  for 4–5 h and the solvent was removed by vacuum distillation. The residue was dissolved in hexane (20 mL) and frozen in the refrigerator to form a solid. After filtration and vacuum drying, the desired Ti-1 was obtained as a pale yellow solid (38.3g, 98%).

## 4. General Procedure for the Fe-catalyzed *ortho* C-H arylation of benzamides

### 4.1 Typical procedure for *ortho* arylation using common Grignard reagents (2a)

Under Ar atmosphere, **Ti-1** (306 mg; 1.2 mmol) was dissolved in 2 mL THF and stirred at room temperature for 20 to 30 min. A solution of 2-MeC<sub>6</sub>H<sub>4</sub>MgBr (2.4 mmol, 1.0 M in THF) was added dropwise through a syringe to the resulting mixture during 10–15 min, and then stirred at room temperature for 30 to 40 min. After that, a solution of TMPMgCl LiCl (1.0 M in THF, 2.4 mmol) was added dropwise through a syringe, and then stirred at room temperature for 30 min.

To another three-necked round-bottom flask were added *N*-methylbenzamide (270 mg, 2 mmol) and 2 mL THF. Under stirring, a solution of 2-MeC<sub>6</sub>H<sub>4</sub>MgBr or *i*-PrMgCl (2.0 mmol, 1.0 M in THF) was added dropwise through a syringe to the resulting mixture during 10–15 min, and then stirred at room temperature for 30 to 40 min. FeCl<sub>3</sub> (32.5 mg; 0.2 mmol) and TMEDA (47 mg, 0.4 mmol) were added to the resulting solution and stirred for 10 min at room temperature. The mixture was heated to 45 °C and the above-prepared mixed titanate was added. The stirring was continued at 45 °C for 1 h before 1,2-dichloroethane (238 mg, 2.4 mmol) was added. The progress of the reaction was monitored by TLC, and after the reaction finished (about 6 hr), the reaction was quenched by adding 100 mL distilled water. After being filtered, the solid and filtrate were extracted with CH<sub>2</sub>Cl<sub>2</sub>. The organic layer was dried over Na<sub>2</sub>SO<sub>4</sub> and concentrated to yield the crude compound, which was purified by column chromatography to afford the desired product **2a** (388 mg, 86% yield).

### 4.2 Typical procedure for *ortho* arylation using functionalized Grignard reagents (2u)

Under Ar atmosphere, the solution of 2-IC<sub>6</sub>H<sub>4</sub>CN (550 mg, 2.4 mmol) in 5 mL THF was cooled to -40 °C under stirring. To this solution was added *i*-PrMgCl LiCl (2.4 mmol, 1.0 M in THF) dropwise. The stirring was continued at that temperature until the exchange reaction was completed (monitored by TLC).

Under Ar atmosphere, THF (2 mL); **Ti-1** (306 mg; 1.2 mmol) were added to another round-bottom flask, and the mixture was stirred and cooled to -45~ -50 °C. To



this solution, the above-prepared Knochel-type functionalized Grignard reagent was added dropwise through a syringe during 10-15 min with the temperature being kept below  $-40\text{ }^{\circ}\text{C}$ . After the addition, the mixture was allowed to come to room temperature in 2 hr, and stirred at that temperature for 30 min. The solvent as well as *i*-PrI were removed under vacuum (about 10 mmHg) during which the temperature was below  $20\text{ }^{\circ}\text{C}$  until the mixture became a paste. THF (10 mL) was added to the paste and the stirring was continued until a solution was formed. After that, a solution of TMPMgCl LiCl (1.0 M in THF, 2.4 mmol) was added dropwise through a syringe, and then stirred at room temperature for 30 min.

To another three-necked round-bottom flask were added *N*-methylbenzamide (270 mg, 2 mmol) and 2 mL THF. Under stirring, a solution of *i*-PrMgCl (2.0 mmol, 1.0 M in THF) was added dropwise through a syringe to the resulting mixture during 10–15 min, and then stirred at room temperature for 30 to 40 min.  $\text{FeCl}_3$  (32.5 mg; 0.2 mmol) and TMEDA (47 mg, 0.4 mmol) were added to the resulting solution and stirred for 10 min at room temperature. The mixture was heated to  $45\text{ }^{\circ}\text{C}$  and the above-prepared mixed titanate was added. The stirring was continued at  $45\text{ }^{\circ}\text{C}$  for 1 h before 1,2-dichloroethane (238 mg, 2.4 mmol) was added. The progress of the reaction was monitored by TLC, and after the reaction finished (about 6 hr), the reaction was quenched by adding 100 mL distilled water. After being filtered, the solid and filtrate were extracted with  $\text{CH}_2\text{Cl}_2$ . The organic layer was dried over  $\text{Na}_2\text{SO}_4$  and concentrated to yield the crude compound, which was purified by column chromatography to yield the desired product **2u** (321 mg, 68% yield).

## 5. Preparations of **4a** and **4b**

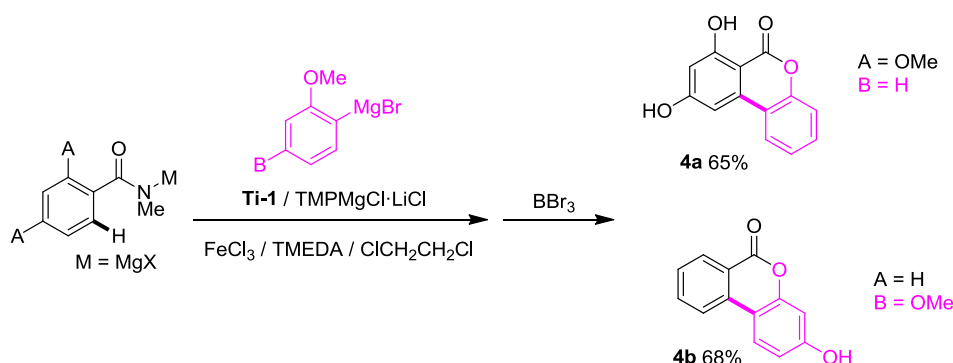

According to typical procedure 4.1, the crude products of arylation reaction were obtained and dissolved in 20 mL  $\text{CH}_2\text{Cl}_2$ . The mixture was stirred and cooled to  $-78\text{ }^{\circ}\text{C}$ , and  $\text{BBr}_3$  (for **4a**: 3.0 g, 12 mmol; for **4b**: 2.0 g, 8 mmol) was added dropwise.

After addition, the mixture was allowed to come to room temperature and stirred for 24 h. The reaction was quenched with methanol (20 mL). The product was taken up with  $\text{CH}_2\text{Cl}_2$  ( $4 \times 50$  mL) and washed with saturated NaCl aqueous solution (50 mL). After dried over  $\text{Na}_2\text{SO}_4$  and concentrated by rotary evaporator, crude product was obtained, which was purified by column chromatography to afford the desired product (**4a**: 297 mg; **4b**: 289 mg).

## 6. Preparations of **4c**

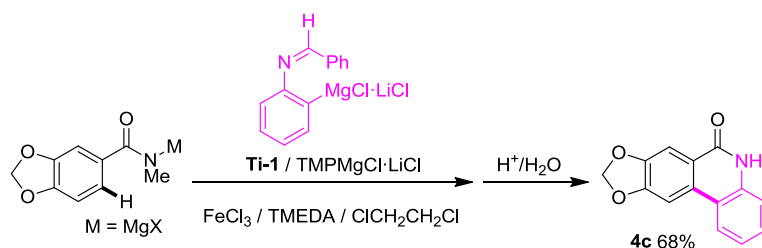

According to typical procedure 4.2, the crude product of arylation reaction was dissolved in 20 mL 2N HCl aqueous solution, and the mixture was stirred at 40 °C for 4 h. The product was taken up with  $\text{CH}_2\text{Cl}_2$  ( $4 \times 50$  mL) and washed with saturated NaCl aqueous solution (50 mL). After dried over  $\text{Na}_2\text{SO}_4$  and concentrated by rotary evaporator, crude product was obtained, which was purified by column chromatography to afford the desired product **4c** (325mg; 68%).

## 7. Preparations of **4d**

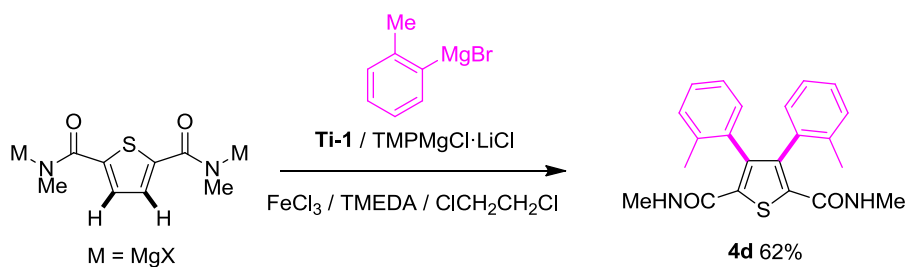

The reaction was conducted on a 2 mmol scale according to typical procedure 4.1. After the first part of mixed titanate [**Ti-1** (1.2 mmol) / 2-MeC<sub>6</sub>H<sub>4</sub>MgBr (2.4 mmol) / TMPMgCl LiCl (2.4 mmol)] and 1,2-dichloroethane (2.4 mmol) was added, the reaction mixture was stirred at 45 °C for 6h; then the second part of mixed titanate and 1,2-dichloroethane (with equal amount to the first part) was added and the reaction was continued for 6h. The reaction was post-treated and purified by the typical procedure to afford **4d** (469 mg; 62%).

## 8. Table S1 condition optimization<sup>a</sup>

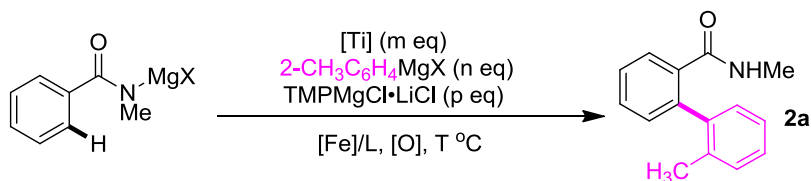

| entry     | [Ti]                                                                | n          | m          | p          | [Fe]/L            | [O]               | T (°C)    | yield <sup>b</sup> (2a, %) |
|-----------|---------------------------------------------------------------------|------------|------------|------------|-------------------|-------------------|-----------|----------------------------|
| 1         | --                                                                  | 1.2        | 0          | 1.2        | FL1               | DCE               | 45        | trace                      |
| 2         | Ti(OEt) <sub>4</sub>                                                | 1.2        | 0.6        | 1.2        | FL1 <sup>d</sup>  | DCE <sup>e</sup>  | 45        | 42                         |
| <b>3</b>  | <b>Ti-1<sup>c</sup></b>                                             | <b>1.2</b> | <b>0.6</b> | <b>1.2</b> | <b>FL1</b>        | <b>DCE</b>        | <b>45</b> | <b>86</b>                  |
| 4         | Ti-2 <sup>c</sup>                                                   | 1.2        | 0.6        | 1.2        | FL1               | DCE               | 45        | 46                         |
| 5         | Ti-3 <sup>c</sup>                                                   | 1.2        | 0.6        | 1.2        | FL1               | DCE               | 45        | 47                         |
| 6         | Ti-4 <sup>c</sup>                                                   | 1.2        | 0.6        | 1.2        | FL1               | DCE               | 45        | 52                         |
| 7         | Ti-5 <sup>c</sup>                                                   | 1.2        | 0.6        | 1.2        | FL1               | DCE               | 45        | 59                         |
| 8         | Ti-6 <sup>c</sup>                                                   | 1.2        | 0.6        | 1.2        | FL1               | DCE               | 45        | 30                         |
| 9         | Ti(OCH <sub>2</sub> CH <sub>2</sub> NMe <sub>2</sub> ) <sub>4</sub> | 1.2        | 0.6        | 1.2        | FL1               | DCE               | 45        | trace                      |
| 10        | Ti-1                                                                | 1.2        | 0.3        | 1.2        | FL1               | DCE               | 45        | 39                         |
| 11        | Ti-1                                                                | 1.2        | 1.0        | 1.2        | FL1               | DCE               | 45        | 52                         |
| 12        | Ti-1                                                                | 1.2        | 1.5        | 1.2        | FL1               | DCE               | 45        | 20                         |
| <b>13</b> | <b>Ti-1</b>                                                         | <b>2.4</b> | <b>0.6</b> | <b>0</b>   | <b>FL1</b>        | <b>DCE</b>        | <b>45</b> | <b>trace</b>               |
| 14        | Ti-1                                                                | 1.6        | 0.6        | 0.8        | FL1               | DCE               | 45        | 43                         |
| 15        | Ti-1                                                                | 1.2        | 0.6        | 1.6        | FL1               | DCE               | 45        | 86                         |
| 16        | Ti-1                                                                | 1.6        | 0.6        | 1.2        | FL1               | DCE               | 45        | 85                         |
| 17        | Ti-1                                                                | 2.0        | 0.6        | 1.2        | FL1               | DCE               | 45        | 83                         |
| 18        | Ti-1                                                                | 1.2        | 0.6        | 1.2        | FL1               | DCE               | 25        | 33                         |
| 19        | Ti-1                                                                | 1.2        | 0.6        | 1.2        | FL1               | DCE               | 65        | 75                         |
| 20        | Ti-1                                                                | 1.2        | 0.6        | 1.2        | FL1               | DCE <sup>f</sup>  | 78        | 60                         |
| 21        | Ti-1                                                                | 1.2        | 0.6        | 1.2        | FeCl <sub>3</sub> | DCE               | 45        | trace                      |
| 22        | Ti-1                                                                | 1.2        | 0.6        | 1.2        | FL2 <sup>d</sup>  | DCE               | 45        | 48                         |
| 23        | Ti-1                                                                | 1.2        | 0.6        | 1.2        | FL3 <sup>d</sup>  | DCE               | 45        | 44                         |
| 24        | Ti-1                                                                | 1.2        | 0.6        | 1.2        | FL4 <sup>d</sup>  | DCE               | 45        | trace                      |
| 25        | Ti-1                                                                | 1.2        | 0.6        | 1.2        | FL1               | DCE <sup>g</sup>  | 45        | 40                         |
| 26        | Ti-1                                                                | 1.2        | 0.6        | 1.2        | FL1               | DBE <sup>e</sup>  | 45        | 47                         |
| 27        | Ti-1                                                                | 1.2        | 0.6        | 1.2        | FL1               | DCIB <sup>e</sup> | 45        | 54                         |
| 28        | Ti-1                                                                | 1.2        | 0.6        | 1.2        | FL1               | O <sub>2</sub>    | 45        | 52                         |

<sup>a</sup>The reaction was carried out on a 1 mmol scale and 10 mol % Fe salts and 20 mol % Me<sub>2</sub>NCH<sub>2</sub>CH<sub>2</sub>NMe<sub>2</sub> (TMEDA) were charged in unless indicated otherwise; and all the reactions were conducted in THF unless indicated otherwise. <sup>b</sup>Isolated yields. <sup>c</sup>The structures of Ti-1, Ti-2, Ti-3, Ti-4, Ti-5, Ti-6 were outlined below. <sup>d</sup>FL1: 10 mol % FeCl<sub>3</sub>/ 20 mol % TMEDA; FL2: 10 mol % FeCl<sub>3</sub>/ 20 mol % PMDETA (outlined below); FL3: 10 mol % FeCl<sub>3</sub>/ 20 mol % PBu<sub>3</sub>; FL4: 10 mol % Fe(acac)<sub>3</sub>/ 20 mol % TMEDA. <sup>e</sup>DCE: ClCH<sub>2</sub>CH<sub>2</sub>Cl; DBE: BrCH<sub>2</sub>CH<sub>2</sub>Br; DCIB: outlined below. These oxidants were charged in 1.2 equivalents unless indicated otherwise. <sup>f</sup>Solvent: THF/PhMe (3:1). <sup>g</sup>2.0 equivalents of DCE were used.

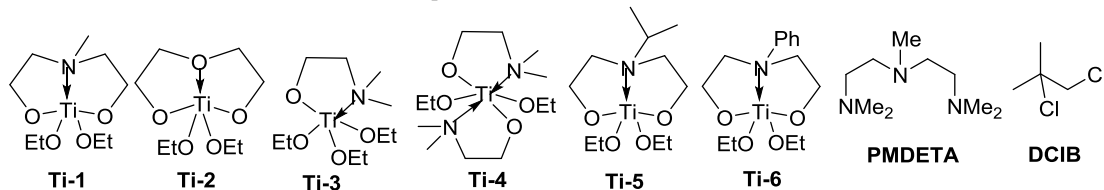

## 9. Characterization data

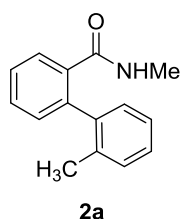

### *N*, 2'-Dimethyl-[1,1'-biphenyl]-2-carboxamide<sup>[4]</sup>

Yellow solid; 86% yield (388 mg); m.p. = 98 °C (lit. 95-96 °C);  $R_f$  = 0.30 (petroleum ether/ethyl acetate = 3:1, v/v).

IR (cm<sup>-1</sup>, KBr): 3296, 1648, 1531, 756, 740; <sup>1</sup>HNMR (CDCl<sub>3</sub>, 400 MHz)  $\delta$  (ppm) 7.91-7.89 (m, 1H), 7.47-7.42 (m, 2H), 7.28-7.25 (m, 3H), 7.20-7.18(m, 2H), 5.26 (br, 1H), 2.61 (d,  $J$  = 4.88 Hz, 3H), 2.10 (s, 3H); <sup>13</sup>C NMR (CDCl<sub>3</sub>, 100 MHz)  $\delta$  (ppm) 169.1, 140.3, 139.2, 136.2, 134.9, 130.51, 130.46, 130.39, 129.4, 129.2, 128.3, 127.8, 126.2, 26.8, 20.1.

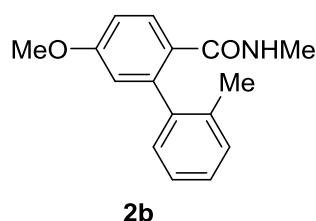

### 5-Methoxy-*N*, 2'-dimethyl-[1,1'-biphenyl]-2-carboxamide

Yellow solid; 72% yield (368 mg); m.p. = 128-129 °C;  $R_f$  = 0.30 (petroleum ether/ethyl acetate = 2:1, v/v).

IR (cm<sup>-1</sup>, KBr): 3300, 1651, 1601, 1223, 826, 764, 608; <sup>1</sup>H NMR (CDCl<sub>3</sub>, 400 MHz)  $\delta$  (ppm) 7.91 (d,  $J$  = 8.72 Hz, 1H), 7.26-7.22 (m, 3H), 7.16-7.14 (m, 1H), 6.91 (dd,  $J$  = 8.72, 2.64 Hz, 1H), 6.63 (d,  $J$  = 2.6 Hz, 1H), 5.16 (br, 1H), 3.78 (s, 3H), 2.54 (d,  $J$  = 4.80 Hz, 3H), 2.05 (s, 3H); <sup>13</sup>C NMR (CDCl<sub>3</sub>, 100 MHz)  $\delta$  (ppm) 168.3, 160.9, 140.9, 140.3, 136.2, 131.7, 130.4, 128.9, 128.3, 126.9, 126.3, 115.5, 113.0, 55.4, 26.7, 19.9; HRMS calcd for C<sub>16</sub>H<sub>18</sub>NO<sub>2</sub><sup>+</sup> [M+H]<sup>+</sup> 256.1338, Found 256.1331.

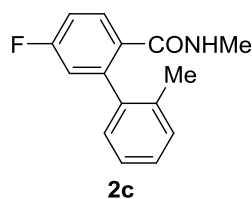

### 5-Fluoro-*N*, 2'-dimethyl-[1,1'-biphenyl]-2-carboxamide

Yellow oil; 85% yield (414 mg);  $R_f$  = 0.32 (petroleum ether/ethyl acetate = 3:1, v/v).

IR ( $\text{cm}^{-1}$ , KBr): 3297, 1658, 668, 568, 552;  $^1\text{H}$  NMR ( $\text{CDCl}_3$ , 400 MHz)  $\delta$  (ppm) 7.97-7.94 (m, 1H), 7.34-7.25 (m, 3H), 7.18 (d,  $J$  = 7.20 Hz, 1H), 7.13-7.11 (m, 1H), 6.89 (dd,  $J$  = 9.20, 2.64 Hz, 1H), 5.21 (br, 1H), 2.60 (d,  $J$  = 4.88 Hz, 3H), 2.11 (s, 3H);  $^{13}\text{C}$  NMR ( $\text{CDCl}_3$ , 100 MHz)  $\delta$  (ppm) 167.9, 163.4 (d,  $J$  = 251.7 Hz, 1C), 141.7 (d,  $J$  = 8.4 Hz, 1C), 139.1, 136.0, 132.0 (d,  $J$  = 9.1 Hz, 1C), 131.0 (d,  $J$  = 3.3 Hz, 1C), 130.6, 128.9, 128.7, 126.4, 117.1 (d,  $J$  = 21.8 Hz, 1C), 114.7 (d,  $J$  = 21.2 Hz, 1C), 26.8, 20.0; HRMS calcd for  $\text{C}_{15}\text{H}_{15}\text{FNO}^+$   $[\text{M}+\text{H}]^+$  244.1138, Found 244.1128.

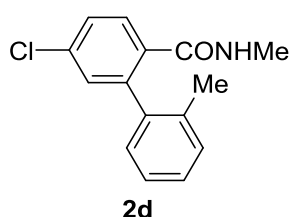

#### 5-Chloro-*N*, 2'-dimethyl-[1,1'-biphenyl]-2-carboxamide

Yellow oil; 73% yield (379 mg);  $R_f$  = 0.32 (petroleum ether/ethyl acetate = 3:1, v/v).

IR ( $\text{cm}^{-1}$ , KBr): 3285, 2926, 1655, 1589, 758, 673;  $^1\text{H}$  NMR ( $\text{CDCl}_3$ , 400 MHz)  $\delta$  (ppm) 7.89 (dd,  $J$  = 8.32, 1.20 Hz, 1H), 7.40 (dd,  $J$  = 8.52, 2.12 Hz, 1H), 7.33-7.26 (m, 3H), 7.20-7.17 (m, 2H), 5.25 (br, 1H), 2.60 (d,  $J$  = 4.84 Hz, 3H), 2.10 (s, 3H);  $^{13}\text{C}$  NMR ( $\text{CDCl}_3$ , 150 MHz)  $\delta$  (ppm) 167.9, 140.9, 138.9, 136.4, 136.1, 133.2, 131.1, 130.7, 130.3, 129.0, 128.8, 128.0, 126.5, 26.8, 20.0; HRMS calcd for  $\text{C}_{15}\text{H}_{15}\text{ClNO}^+$   $[\text{M}+\text{H}]^+$  260.0842, Found 260.0833.

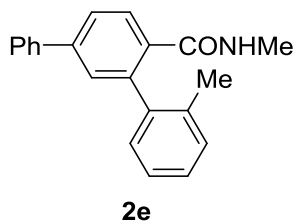

#### *N*, 2''-Dimethyl-[1,1':3',1''-terphenyl]-4'-carboxamide

Whitish solid; 75% yield (452 mg); m.p. = 152  $^{\circ}\text{C}$ ;  $R_f$  = 0.35 (petroleum ether/ethyl acetate = 3:1, v/v).

IR ( $\text{cm}^{-1}$ , KBr): 3275, 1653, 1559, 758, 744, 696;  $^1\text{H}$  NMR ( $\text{CDCl}_3$ , 400 MHz)  $\delta$  (ppm) 8.03 (d,  $J$  = 8.12 Hz, 1H), 7.68 (d,  $J$  = 8.12, 1.76 Hz, 1H), 7.63 (d,  $J$  = 7.28 Hz,

2H), 7.46-7.42 (m, 3H), 7.38-7.26 (m, 5H), 5.34 (br, 1H), 2.65 (d,  $J = 4.88$  Hz, 3H), 2.16 (s, 3H);  $^{13}\text{C}$  NMR ( $\text{CDCl}_3$ , 100 MHz)  $\delta$  (ppm) 168.6, 143.0, 140.2, 139.8, 139.6, 136.2, 133.4, 130.5, 130.1, 129.2, 129.0, 128.9, 128.3, 128.0, 127.2, 126.3, 126.2, 26.8, 20.1; HRMS calcd for  $\text{C}_{21}\text{H}_{20}\text{NO}^+$   $[\text{M}+\text{H}]^+$  302.1545, Found 302.1543.

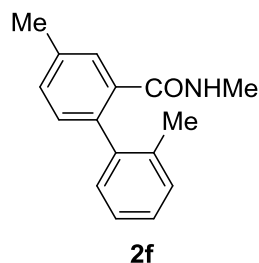

#### ***N*,2',4-Trimethyl-[1,1'-biphenyl]-2-carboxamide**

Yellow oil; 72% yield (345 mg);  $R_f = 0.34$  (petroleum ether/ethyl acetate = 3:1, v/v).

IR ( $\text{cm}^{-1}$ , KBr): 3292, 1656, 1539, 850, 750;  $^1\text{H}$  NMR ( $\text{CDCl}_3$ , 400 MHz)  $\delta$  (ppm) 7.71 (d,  $J = 0.32$  Hz, 1H), 7.28-7.21 (m, 4H), 7.16 (d,  $J = 7.04$  Hz, 2H), 7.07 (d,  $J = 7.72$  Hz, 1H), 5.27 (br, 1H), 2.59 (d,  $J = 4.88$  Hz), 2.41 (s, 3H), 2.10 (s, 3H);  $^{13}\text{C}$  NMR ( $\text{CDCl}_3$ , 100 MHz)  $\delta$  (ppm) 169.2, 140.2, 137.5, 136.23, 136.21, 134.6, 131.0, 130.4, 130.3, 129.7, 129.3, 128.0, 126.1, 26.7, 21.0, 20.0; HRMS calcd for  $\text{C}_{16}\text{H}_{18}\text{NO}^+$   $[\text{M}+\text{H}]^+$  240.1388, Found 240.1382.

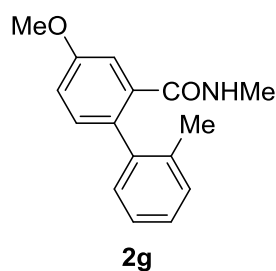

#### **4-Methoxy-*N*,2'-dimethyl-[1,1'-biphenyl]-2-carboxamide**

Yellow oil; 80% yield (408 mg);  $R_f = 0.30$  (petroleum ether/ethyl acetate = 2:1, v/v).

IR ( $\text{cm}^{-1}$ , KBr): 3296, 2926, 1647, 1256, 786, 742;  $^1\text{H}$  NMR ( $\text{CDCl}_3$ , 400 MHz)  $\delta$  (ppm) 7.51 (d,  $J = 2.72$  Hz, 1H), 7.32-7.26 (m, 3H), 7.21 (d,  $J = 7.0$  Hz, 1H), 7.14 (d,  $J = 8.40$  Hz, 1H), 7.05 (dd,  $J = 8.40, 2.72$  Hz, 1H), 5.33 (br, 1H), 3.91 (s, 3H), 2.64 (d,  $J = 4.88$  Hz), 2.14 (s, 3H);  $^{13}\text{C}$  NMR ( $\text{CDCl}_3$ , 100 MHz)  $\delta$  (ppm) 168.7, 159.0,

139.9, 136.5, 135.8, 131.6, 131.4, 130.4, 129.5, 128.0, 126.2, 117.1, 113.5, 55.5, 26.7, 20.0; HRMS calcd for  $C_{16}H_{18}NO_2^+$   $[M+H]^+$  256.1338, Found 256.1331.

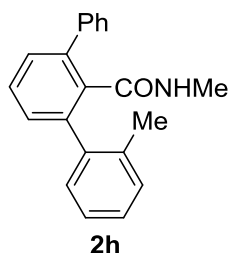

### ***N*,2-Dimethyl-[1,1':3',1''-terphenyl]-2'-carboxamide**

Whitish solid; 76% yield (458 mg); m.p. = 161 °C;  $R_f$  = 0.38 (petroleum ether/ethyl acetate = 3:1, v/v).

IR ( $cm^{-1}$ , KBr): 3280, 1646, 1540, 801, 744, 693;  $^1H$  NMR ( $CDCl_3$ , 400 MHz)  $\delta$  (ppm) 7.52 (t,  $J$  = 8.01 Hz, 1H), 7.48-7.35 (m, 11H), 5.31 (br, 1H), 2.69 (d,  $J$  = 4.94 Hz, 3H), 2.06 (s, 3H);  $^{13}C$  NMR ( $CDCl_3$ , 100 MHz)  $\delta$  (ppm) 168.9, 142.3, 140.4, 140.2, 139.4, 138.3, 137.5, 129.7, 129.3, 128.6, 128.3, 128.1, 127.3, 126.2, 125.2, 124.6, 124.2, 26.7, 21.0; HRMS calcd for  $C_{21}H_{20}NO^+$   $[M+H]^+$  302.1545, Found 302.1533.

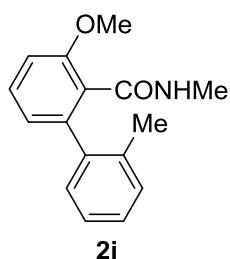

### **3-Methoxy-*N*,2'-dimethyl-[1,1'-biphenyl]-2-carboxamide**

Whitish solid; 70% yield (357 mg); m.p. = 151 °C;  $R_f$  = 0.35 (petroleum ether/ethyl acetate = 2:1, v/v)

IR ( $cm^{-1}$ , KBr): 3306, 1649, 1466, 1256, 1020, 802, 760;  $^1H$  NMR ( $CDCl_3$ , 400 MHz)  $\delta$  (ppm) 7.31 (t,  $J$  = 8.04 Hz, 1H), 7.22-7.17 (m, 2H), 7.14-7.09 (m, 2H), 6.88 (d,  $J$  = 7.70, 1H), 6.77 (d,  $J$  = 7.64, 1H), 5.30 (br, 1H), 3.83 (s, 3H), 2.59 (d,  $J$  = 4.92 Hz, 3H), 2.12 (s, 3H);  $^{13}C$  NMR ( $CDCl_3$ , 100 MHz)  $\delta$  (ppm) 167.7, 156.4, 141.1, 139.6, 135.8, 130.0, 129.7, 129.0, 127.6, 126.6, 125.2, 122.3, 109.8, 55.9, 26.3, 20.2; HRMS calcd for  $C_{16}H_{18}NO_2^+$   $[M+H]^+$  256.1332, Found 256.1328.

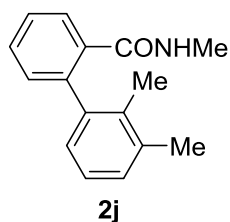

***N*,2',3'-Trimethyl-[1,1'-biphenyl]-2-carboxamide**

Whitish solid; 73% yield (349 mg); m.p. = 105 °C;  $R_f$  = 0.34 (petroleum ether/ethyl acetate = 3:1, v/v).

IR (cm<sup>-1</sup>, KBr): 3291, 2926, 1696, 1535, 1306, 787, 760; <sup>1</sup>H NMR (CDCl<sub>3</sub>, 400 MHz)  $\delta$  (ppm)  $\delta$  7.92 (dd,  $J$  = 7.48, 1.56 Hz, 1H), 7.48-7.40 (m, 2H), 7.19-7.14 (m, 3H), 7.05-7.03 (m, 1H), 5.24 (br, 1H), 2.60 (d,  $J$  = 4.92 Hz, 3H), 2.32 (s, 3H), 1.99 (s, 3H); <sup>13</sup>C NMR (CDCl<sub>3</sub>, 100 MHz)  $\delta$  (ppm) 169.0, 140.4, 139.8, 137.6, 135.0, 134.8, 130.5, 130.3, 129.8, 129.4, 127.6, 127.0, 125.8, 26.8, 20.6, 16.7; HRMS calcd for C<sub>16</sub>H<sub>18</sub>NO<sup>+</sup> [M+H]<sup>+</sup> 240.1388, Found 240.1388.

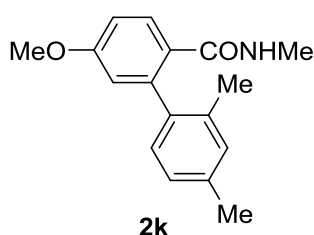

**5-Methoxy-*N*,2',4'-trimethyl-[1,1'-biphenyl]-2-carboxamide**

Whitish solid; 71% yield (382 mg); m.p. = 145 °C;  $R_f$  = 0.34 (petroleum ether/ethyl acetate = 3:1, v/v).

IR (cm<sup>-1</sup>, KBr): 3304, 1658, 1221, 826, 610; <sup>1</sup>H NMR (CDCl<sub>3</sub>, 400 MHz)  $\delta$  (ppm) 7.95 (dd,  $J$  = 8.68, 2.68 Hz, 1H), 7.09-7.07 (m, 3H), 6.92 (dt,  $J$  = 8.68, 2.36 Hz, 1H), 6.64 (d,  $J$  = 2.44 Hz, 1H), 5.30 (br, 1H), 3.81 (d,  $J$  = 1.48 Hz, 3H), 2.60 (dd,  $J$  = 4.84, 0.80 Hz, 3H), 2.36 (s, 3H), 2.05 (s, 3H); <sup>13</sup>C NMR (CDCl<sub>3</sub>, 100 MHz)  $\delta$  (ppm) 168.4, 160.9, 141.0, 138.0, 137.3, 135.9, 131.6, 131.2, 128.9, 127.0, 115.7, 112.9, 55.4, 26.7, 21.2, 19.8; HRMS calcd for C<sub>17</sub>H<sub>20</sub>NO<sub>2</sub><sup>+</sup> [M+H]<sup>+</sup> 270.1494, Found 270.1485.

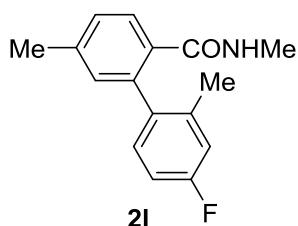



**4'-Fluoro-N,2',5-trimethyl-[1,1'-biphenyl]-2-carboxamide**

Whitish solid; 78% yield (401 mg); m.p. = 96-97 °C;  $R_f$  = 0.34 (petroleum ether/ethyl acetate = 3:1, v/v).

IR (cm<sup>-1</sup>, KBr): 3289, 1653, 1474, 857, 802; <sup>1</sup>H NMR (CDCl<sub>3</sub>, 400 MHz) δ (ppm) 7.56 (d, *J* = 7.80 Hz, 1H), 7.21 (d, *J* = 7.76 Hz, 1H), 7.14 (s, 1H), 6.98 (s, 1H), 6.91-6.86 (m, 2H), 5.28 (br, 1H), 2.71 (d, *J* = 4.88 Hz, 3H), 2.40-2.38 (m, 6H); <sup>13</sup>C NMR (CDCl<sub>3</sub>, 100 MHz) δ (ppm) 170.0, 162.7 (d, *J* = 246.3 Hz, 1C), 142.3, 140.5, 140.3, 138.3, 132.9, 130.7, 128.9, 128.6, 125.1, 115.2 (d, *J* = 20.8 Hz, 1C), 112.5 (d, *J* = 22.3 Hz, 1C), 26.7, 21.4, 21.3; HRMS calcd for C<sub>16</sub>H<sub>17</sub>FNO<sup>+</sup> [M+H]<sup>+</sup> 258.1294, Found 258.1293.

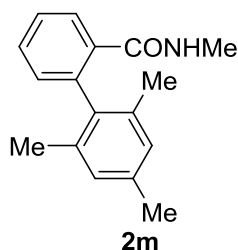

***N*,2',4',6'-Tetramethyl-[1,1'-biphenyl]-2-carboxamide**

Whitish solid; 72% yield (365 mg); m.p. = 128 °C;  $R_f$  = 0.36 (petroleum ether/ethyl acetate = 3:1, v/v).

IR (cm<sup>-1</sup>, KBr): 3288, 2910, 1689, 1548, 850, 770; <sup>1</sup>H NMR (CDCl<sub>3</sub>, 400 MHz) δ (ppm) δ 8.02 (d, *J* = 7.49, 1H), 7.52-7.47 (m, 2H), 7.12-7.09 (m, 1H), 6.89 (s, 2H), 5.13 (br, 1H), 2.65 (d, *J* = 4.89 Hz, 3H), 2.32 (s, 3H), 1.95 (s, 3H); <sup>13</sup>C NMR (CDCl<sub>3</sub>, 100 MHz) δ (ppm) 168.9, 141.3, 140.4, 139.3, 137.5, 130.9, 130.3, 129.4, 127.5, 126.3, 26.7, 21.1, 20.4; HRMS calcd for C<sub>17</sub>H<sub>18</sub>NO<sup>+</sup> [M+H]<sup>+</sup> 254.1545, Found 254.1537.

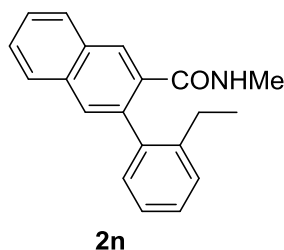

### 3-(2-Ethylphenyl)-N-methyl-2-naphthamide

Yellow oil; 75% yield (434 mg);  $R_f = 0.35$  (petroleum ether/ethyl acetate = 3:1, v/v).

IR (cm<sup>-1</sup>, KBr): 3308, 1654, 1537, 768, 665; <sup>1</sup>H NMR (CDCl<sub>3</sub>, 400 MHz) δ (ppm) 8.51 (s, 1H), 7.97-7.95 (m, 1H), 7.83 (d, *J* = 7.20 Hz, 1H), 7.68 (s, 1H), 7.58-7.52 (m, 2H), 7.41-7.35 (m, 2H), 7.32-7.25 (m, 2H), 5.38 (br, 1H), 2.65 (d, *J* = 4.80 Hz, 3H), 2.54-2.39 (m, 2H), 1.02 (t, *J* = 7.52 Hz, 3H); <sup>13</sup>C NMR (CDCl<sub>3</sub>, 100 MHz) δ (ppm) 168.6, 142.6, 139.9, 136.2, 133.9, 132.9, 132.2, 130.1, 129.7, 129.6, 128.84, 128.79, 128.6, 127.8, 127.6, 126.7, 126.2, 26.9, 26.2, 14.9; HRMS calcd for C<sub>20</sub>H<sub>20</sub>NO<sup>+</sup> [M+H]<sup>+</sup> 290.1545, Found 290.1542.

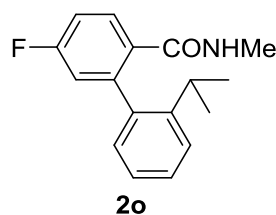

#### 5-Fluoro-2'-isopropyl-N-methyl-[1,1'-biphenyl]-2-carboxamide

Yellow oil; 79% yield (429 mg); *R<sub>f</sub>* = 0.34 (petroleum ether/ethyl acetate = 3:1, v/v).

IR (cm<sup>-1</sup>, KBr): 3302, 1646, 1180, 831, 752, 606; <sup>1</sup>H NMR (CDCl<sub>3</sub>, 400 MHz) δ (ppm) 8.01 (dd, *J* = 8.58, 5.98 Hz, 1H), 7.42-7.41 (m, 2H), 7.28-7.25 (m, 1H), 7.15-7.11 (m, 2H), 6.90 (d, *J* = 8.96, 2.36 Hz, 1H), 5.25 (br, 1H), 2.76-2.72 (m, 1H), 2.59 (d, *J* = 4.68 Hz, 3H), 1.14 (d, *J* = 6.72 Hz, 3H), 1.04 (d, *J* = 6.72 Hz, 3H); <sup>13</sup>C NMR (CDCl<sub>3</sub>, 100 MHz) δ (ppm) 167.5, 163.4 (d, *J* = 252.1 Hz, 1C), 146.8, 141.7, 138.0, 132.1 (d, *J* = 8.9 Hz, 1C), 130.7, 129.2, 128.9, 126.3, 126.2, 117.4 (d, *J* = 21.8 Hz, 1C), 114.8 (d, *J* = 20.9 Hz, 1C), 29.9, 26.7, 24.7, 23.1; HRMS calcd for C<sub>17</sub>H<sub>19</sub>FNO<sup>+</sup> [M+H]<sup>+</sup> 272.1451, Found 272.1452.

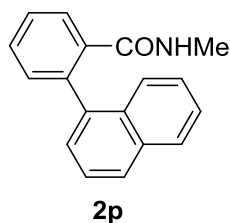

#### N-Methyl-2-(naphthalen-1-yl)benzamide

Whitish solid; 85% yield (444 mg); m.p. = 132 °C; *R<sub>f</sub>* = 0.33 (petroleum ether/ethyl acetate = 3:1, v/v).

IR (cm<sup>-1</sup>, KBr): 3296, 2957, 1645, 1539, 779, 669; <sup>1</sup>H NMR (CDCl<sub>3</sub>, 400 MHz) δ (ppm) 7.94-7.88 (m, 3H), 7.61 (d, *J* = 8.32 Hz, 1H), 7.56-7.48 (m, 4H), 7.45-7.41

(m, 2H), 7.38-7.36 (m, 1H), 5.14 (br, 1H), 2.34 (d,  $J = 4.92$  Hz, 3H);  $^{13}\text{C}$  NMR ( $\text{CDCl}_3$ , 100 MHz)  $\delta$  (ppm) 169.1, 138.2, 137.6, 136.3, 133.6, 131.7, 131.3, 130.1, 129.2, 128.40, 128.36, 128.1, 126.9, 126.8, 126.2, 125.43, 125.38, 26.4; HRMS calcd for  $\text{C}_{18}\text{H}_{16}\text{NO}^+ [\text{M}+\text{H}]^+$  262.1232, Found 262.1221.

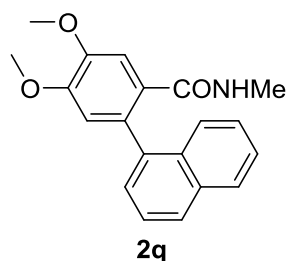

#### 4,5-Dimethoxy-*N*-methyl-2-(naphthalen-1-yl)benzamide

Yellow solid; 79% yield (508 mg); m.p. = 155 °C;  $R_f$  = 0.33 (petroleum ether/ethyl acetate = 2:1, v/v).

IR ( $\text{cm}^{-1}$ , KBr): 3293, 2934, 1647, 1506, 1211, 781, 623;  $^1\text{H}$  NMR ( $\text{CDCl}_3$ , 400 MHz)  $\delta$  (ppm) 7.91-7.88 (m, 2H), 7.62 (d,  $J = 8.32$  Hz, 1H), 7.56 (s, 1H), 7.54-7.48 (m, 2H), 7.45-7.42 (m, 2H), 6.78 (s, 1H), 5.12 (br, 1H), 3.99 (s, 3H), 3.85 (s, 3H), 2.29 (d,  $J = 4.88$  Hz, 3H);  $^{13}\text{C}$  NMR ( $\text{CDCl}_3$ , 100 MHz)  $\delta$  (ppm) 168.4, 150.2, 148.5, 138.2, 133.6, 131.9, 130.7, 128.5, 128.4, 128.1, 127.0, 126.9, 126.4, 125.5, 113.7, 112.2, 56.08, 56.06, 26.5; HRMS calcd for  $\text{C}_{20}\text{H}_{20}\text{NO}_3^+ [\text{M}+\text{H}]^+$  322.1443, Found 322.1440.

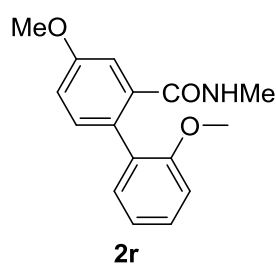

#### 2',4-Dimethoxy-*N*-methyl-[1,1'-biphenyl]-2-carboxamide

Yellow solid; 80% yield (434 mg); m.p. = 133 °C;  $R_f$  = 0.28 (petroleum ether/ethyl acetate = 2:1, v/v).

IR ( $\text{cm}^{-1}$ , KBr): 3318, 2957, 1647, 1238, 1043, 752;  $^1\text{H}$  NMR ( $\text{CDCl}_3$ , 600 MHz)  $\delta$  (ppm) 7.33-7.31 (m, 2H), 7.22-7.17 (m, 2H), 7.01-6.91 (m, 3H), 5.49 (br, 1H), 3.84-3.74 (m, 6H), 2.64 (d,  $J = 4.80$  Hz, 3H);  $^{13}\text{C}$  NMR ( $\text{CDCl}_3$ , 150 MHz)  $\delta$  (ppm)

169.6, 159.1, 156.6, 137.3, 132.3, 130.9, 129.4, 129.2, 128.1, 121.1, 116.8, 113.1, 110.8, 55.5, 26.5; HRMS calcd for  $C_{16}H_{18}NO_3^+$   $[M+H]^+$  272.1287, Found 272.1284.

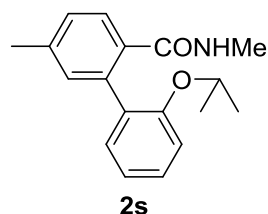

### 2'-Isopropoxy-N,5-dimethyl-[1,1'-biphenyl]-2-carboxamide

Yellow oil; 68% yield (385 mg);  $R_f$  = 0.35 (petroleum ether/ethyl acetate = 3:1, v/v).

IR ( $cm^{-1}$ , KBr): 3293, 2920, 1648, 1535, 826, 752;  $^1H$  NMR ( $CDCl_3$ , 600 MHz)  $\delta$  (ppm) 7.70 (d,  $J$  = 7.80 Hz, 1H), 7.31 (td,  $J$  = 7.86, 1.92 Hz, 1H), 7.22-7.20 (m, 2H), 7.03 (s, 1H), 7.01-6.98 (m, 1H), 6.93 (d,  $J$  = 8.22 Hz, 1H), 5.69 (br, 1H), 4.46-4.42 (m, 1H), 2.63 (d,  $J$  = 4.92 Hz, 3H), 2.38 (s, 3H), 1.20-1.19 (m, 6H);  $^{13}C$  NMR ( $CDCl_3$ , 150 MHz) 169.7, 154.7, 140.0, 136.2, 133.4, 131.7, 131.1, 131.0, 129.3, 128.8, 128.2, 121.0, 113.8, 70.7, 26.5, 22.0, 21.4; HRMS calcd for  $C_{18}H_{22}NO_2^+$   $[M+H]^+$  284.1651, Found 284.1648.

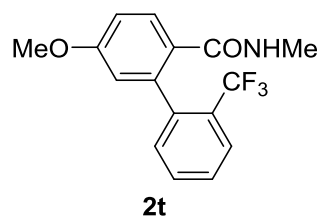

### 5-Methoxy-N-methyl-2'-(trifluoromethyl)-[1,1'-biphenyl]-2-carboxamide

Yellow oil; 78% yield (483 mg);  $R_f$  = 0.33 (petroleum ether/ethyl acetate = 2:1, v/v).

IR ( $cm^{-1}$ , KBr): 3298, 1653, 1559, 669;  $^1H$  NMR ( $CDCl_3$ , 400 MHz)  $\delta$  (ppm) 7.74 (d,  $J$  = 7.80 Hz, 1H), 7.63 (d,  $J$  = 8.60 Hz, 1H), 7.56-7.52 (m, 1H), 7.49-7.46 (m, 1H), 7.30 (d,  $J$  = 7.48 Hz, 1H), 6.92 (dd,  $J$  = 8.60, 1.48 Hz, 1H), 6.74 (d,  $J$  = 1.88 Hz, 1H), 5.44 (br, 1H), 3.80 (s, 3H), 2.60 (d,  $J$  = 4.84 Hz, 3H);  $^{13}C$  NMR ( $CDCl_3$ , 100 MHz)  $\delta$  (ppm) 168.8, 159.9, 139.4, 138.8, 131.6, 131.5, 129.8, 128.1, 127.9, 127.6 (d,  $J$  = 3.5 Hz, 1C), 126.1 (d,  $J$  = 5.2 Hz, 1C), 125.5, 116.1, 113.5, 55.4, 26.5; HRMS calcd for  $C_{16}H_{15}F_3NO_2^+$   $[M+H]^+$  310.1055, Found 310.1052.

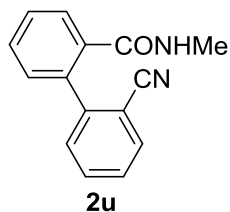

### 2'-Cyano-*N*-methyl-[1,1'-biphenyl]-2-carboxamide

Yellow solid; 68% yield (321 mg); m.p. = 124 °C;  $R_f$  = 0.25 (petroleum ether/ethyl acetate = 3:1, v/v).

IR (cm<sup>-1</sup>, KBr): 3308, 1653, 1541, 762; <sup>1</sup>H NMR (CDCl<sub>3</sub>, 400 MHz)  $\delta$  (ppm) 7.72 (d,  $J$  = 7.76 Hz, 1H), 7.65-7.60 (m, 2H), 7.56-7.44 (m, 4H), 7.38 (d,  $J$  = 7.33, 0.96 Hz, 1H), 5.72 (br, 1H), 2.81 (d,  $J$  = 4.88 Hz, 3H); <sup>13</sup>C NMR (CDCl<sub>3</sub>, 100 MHz)  $\delta$  (ppm) 169.4, 144.7, 136.7, 136.5, 132.8, 132.6, 130.8, 130.5, 130.2, 128.9, 127.9, 127.6, 126.4, 118.2, 111.8, 26.8; HRMS calcd for C<sub>15</sub>H<sub>12</sub>N<sub>2</sub>NaO<sup>+</sup> [M+Na]<sup>+</sup> 259.0847, Found 259.0846.

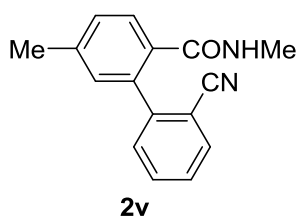

### 2'-Cyano-*N*,5-dimethyl-[1,1'-biphenyl]-2-carboxamide

Yellow oil; 66% yield (330 mg);  $R_f$  = 0.24 (petroleum ether/ethyl acetate = 3:1, v/v).

IR (cm<sup>-1</sup>, KBr): 3300, 1648, 1420, 801, 735; <sup>1</sup>H NMR (CDCl<sub>3</sub>, 400 MHz)  $\delta$  (ppm) 7.56 (d,  $J$  = 7.85 Hz, 1H), 7.49-7.45 (m, 3H), 7.31-7.29 (m, 2H), 7.05 (d,  $J$  = 7.86 Hz, 1H), 6.81 (br, 1H), 2.73 (d,  $J$  = 4.7 Hz, 3H), 2.18 (s, 3H); <sup>13</sup>C NMR (CDCl<sub>3</sub>, 100 MHz)  $\delta$  (ppm) 169.6, 146.1, 145.0, 137.2, 132.9, 132.5, 132.2, 131.8, 130.9, 129.1, 128.3, 128.1, 127.5, 114.3, 26.8, 21.2; HRMS calcd for C<sub>16</sub>H<sub>15</sub>N<sub>2</sub>O<sup>+</sup> [M+H]<sup>+</sup> 251.1184, Found 251.1182.

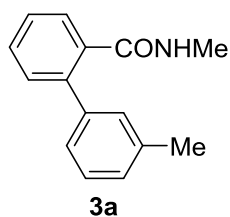

### ***N*,3'-Dimethyl-[1,1'-biphenyl]-2-carboxamide<sup>[4]</sup>**

Yellow solid; 79% yield (356 mg); m.p. = 146-147 °C (lit. 144-146 °C);  $R_f$  = 0.30 (petroleum ether/ethyl acetate = 3:1, v/v).

IR (cm<sup>-1</sup>, KBr): 3279, 1634, 1314, 756, 700, 448; <sup>1</sup>H NMR (CDCl<sub>3</sub>, 400 MHz)  $\delta$  (ppm) 7.70 (d,  $J$  = 7.48 Hz, 1H), 7.46 (td,  $J$  = 7.48, 1.36 Hz, 1H), 7.42-7.35 (m, 2H), 7.31 (t,  $J$  = 7.48 Hz, 1H), 7.23-7.18 (m, 3H), 5.20 (br, 1H), 2.68 (d,  $J$  = 4.92 Hz, 3H), 2.40 (s, 3H); <sup>13</sup>C NMR (CDCl<sub>3</sub>, 100 MHz)  $\delta$  (ppm) 170.3, 140.1, 139.5, 138.3, 135.6, 130.1, 129.3, 128.9, 128.52, 128.46, 127.5, 125.7, 26.7, 21.4.

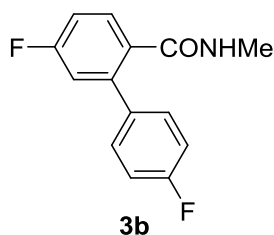

### **4',5-Difluoro-*N*-methyl-[1,1'-biphenyl]-2-carboxamide**

Whitish solid; 78% yield (386 mg); m.p. = 200 °C;  $R_f$  = 0.32 (petroleum ether/ethyl acetate = 3:1, v/v).

IR (cm<sup>-1</sup>, KBr): 3242, 1626, 1223, 843, 610, 419; <sup>1</sup>H NMR (CDCl<sub>3</sub>, 400 MHz)  $\delta$  (ppm) 7.66 (dd,  $J$  = 8.44, 8.44 Hz, 3H), 7.39-7.36 (m, 2H), 7.15-7.03 (m, 4H), 5.19 (s, 1H), 2.71 (d,  $J$  = 4.88 Hz, 3H); <sup>13</sup>C NMR (CDCl<sub>3</sub>, 100 MHz)  $\delta$  (ppm) 169.2, 164.2(d,  $J$  = 45.7 Hz, 1C), 161.8(d,  $J$  = 43.6 Hz, 1C), 140.8(d,  $J$  = 8.3 Hz, 1C), 132.0(d,  $J$  = 3.3 Hz, 1C), 131.0(d,  $J$  = 8.9 Hz, 1C), 130.2(d,  $J$  = 8.13 Hz, 2C), 116.9(d,  $J$  = 22.1 Hz, 1C), 115.8(d,  $J$  = 21.8 Hz, 2C), 114.7(d,  $J$  = 21.5 Hz, 1C), 26.7; HRMS calcd for C<sub>14</sub>H<sub>12</sub>F<sub>2</sub>NO<sup>+</sup> [M+H]<sup>+</sup> 248.0887, Found 248.0879.

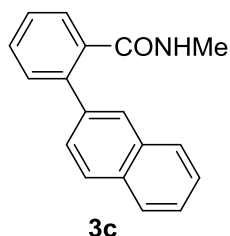

### ***N*-Methyl-2-(naphthalen-2-yl)benzamide**

Yellow solid; 73% yield (381 mg); m. p. = 106 °C;  $R_f$  = 0.31 (petroleum ether/ethyl acetate = 3:1, v/v).

IR (cm<sup>-1</sup>, KBr): 3298, 2922, 1631, 1410, 760, 662, 478; <sup>1</sup>H NMR (CDCl<sub>3</sub>, 400 MHz)  $\delta$  (ppm) 7.91-7.87 (m, 4H), 7.74 (d,  $J$  = 7.56 Hz, 1H), 7.55-7.47 (m, 5H),

7.46-7.42 (m, 1H), 5.27 (br, 1H), 2.62 (d,  $J = 4.88$ , 3H);  $^{13}\text{C}$  NMR ( $\text{CDCl}_3$ , 100 MHz)  $\delta$  (ppm) 170.2, 139.2, 137.7, 135.9, 133.4, 132.7, 130.5, 130.2, 129.0, 128.1, 127.7, 127.4, 126.9, 126.5, 126.4, 26.7; HRMS calcd for  $\text{C}_{18}\text{H}_{15}\text{NNaO}^+ [\text{M}+\text{Na}]^+$  284.1051, Found 284.1043.

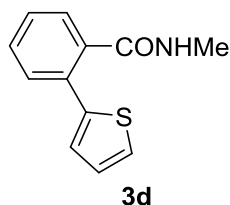

***N*-Methyl-2-(thiophen-2-yl)benzamide<sup>[5]</sup>**

Yellow solid; 69% yield (300 mg); m.p. = 141 °C;  $R_f$  = 0.32 (petroleum ether/ethyl acetate = 3:1).

IR ( $\text{cm}^{-1}$ , KBr): 3318, 1628, 837, 818, 787, 770, 745;  $^1\text{H}$  NMR ( $\text{CDCl}_3$ , 400 MHz)  $\delta$  (ppm) 7.58 (d,  $J = 7.5$  Hz, 1H), 7.45 (dtd,  $J = 9.1, 7.7, 1.4$  Hz, 2H), 7.39-7.32 (m, 2H), 7.16 (dd,  $J = 3.6, 1.1$  Hz, 1H), 7.07 (dd,  $J = 5.1, 3.6$  Hz, 1H), 5.52 (br, 1H), 2.80 (d,  $J = 4.9$  Hz, 3H);  $^{13}\text{C}$  NMR ( $\text{CDCl}_3$ , 100 MHz)  $\delta$  (ppm) 170.3, 141.3, 136.1, 131.7, 130.4, 129.9, 128.5, 128.0, 127.7, 126.7, 126.3, 26.8.

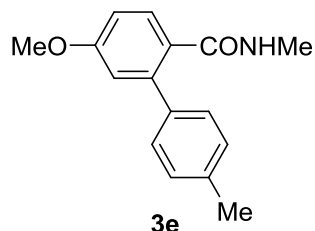

**5-Methoxy-*N*,4'-dimethyl-[1,1'-biphenyl]-2-carboxamide<sup>[4]</sup>**

Whitish solid; 73% yield (373 mg); m.p. = 130-131 °C (lit. 128-129 °C);  $R_f$  = 0.27 (petroleum ether/ethyl acetate = 2:1, v/v).

IR ( $\text{cm}^{-1}$ , KBr): 3293, 1647, 1559, 1221, 828;  $^1\text{H}$  NMR ( $\text{CDCl}_3$ , 400 MHz)  $\delta$  (ppm) 7.66 (d,  $J = 8.46, 2.78$  Hz, 1H), 7.27-7.19 (m, 4H), 6.88 (d,  $J = 8.52$  Hz, 1H), 6.80 (d,  $J = 2.24$  Hz, 1H), 5.25 (br, 1H), 3.82 (s, 3H), 2.64 (d,  $J = 4.80$  Hz, 3H), 2.38 (s, 3H);  $^{13}\text{C}$  NMR ( $\text{CDCl}_3$ , 100 MHz)  $\delta$  (ppm) 169.9, 160.6, 141.3, 137.7, 137.3, 130.9, 129.3, 128.5, 127.9, 115.4, 112.8, 55.4, 26.7, 21.2.

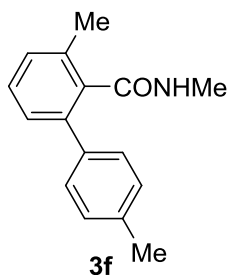

***N*,3,4'-Trimethyl-[1,1'-biphenyl]-2-carboxamide<sup>[4]</sup>**

Whitish solid; 75% yield (359 mg); m.p. = 187 °C (lit. 185-186 °C);  $R_f$  = 0.39 (petroleum ether/ethyl acetate = 3:1, v/v).

IR (cm<sup>-1</sup>, KBr): 3231, 1624, 1458, 793, 714; <sup>1</sup>H NMR (CDCl<sub>3</sub>, 400 MHz)  $\delta$  (ppm) 7.34-7.28 (m, 3H), 7.20-7.18 (m, 4H), 5.23 (br, 1H), 2.66 (d,  $J$  = 4.92 Hz, 3H), 2.41 (s, 3H), 2.37 (s, 3H); <sup>13</sup>C NMR (CDCl<sub>3</sub>, 100 MHz)  $\delta$  (ppm) 170.8, 139.1, 137.6, 137.1, 136.4, 135.8, 129.11, 129.07, 128.9, 128.3, 127.2, 26.5, 21.1, 19.6.

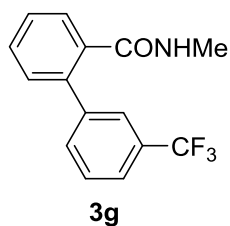

***N*-Methyl-3'-(trifluoromethyl)-[1,1'-biphenyl]-2-carboxamide**

Whitish solid; 69% yield (385 mg); m.p. = 79 °C;  $R_f$  = 0.33 (petroleum ether/ethyl acetate = 3:1, v/v).

IR (cm<sup>-1</sup>, KBr): 3264, 1645, 1335, 758, 702; <sup>1</sup>H NMR (CDCl<sub>3</sub>, 400 MHz)  $\delta$  (ppm) 7.67 (s, 1H), 7.62-7.60 (m, 3H), 7.54-7.37 (m, 4H), 5.32 (br, 1H), 2.72 (d,  $J$  = 4.88 Hz, 3H); <sup>13</sup>C NMR (CDCl<sub>3</sub>, 100 MHz)  $\delta$  (ppm) 170.0, 141.0, 138.0, 136.2, 132.1, 131.1 (d,  $J$  = 32.3 Hz, 1C), 130.4, 130.2, 129.0, 128.6, 128.3, 125.4 (d,  $J$  = 3.6 Hz, 1C), 124.5 (d,  $J$  = 3.6 Hz, 1C), 122.7, 26.7; HRMS calcd for C<sub>15</sub>H<sub>13</sub>F<sub>3</sub>NO<sup>+</sup> [M+H]<sup>+</sup> 280.0949, Found 280.0947.

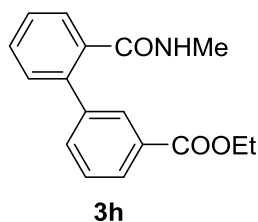

**Ethyl 2'-(methylcarbamoyl)-[1,1'-biphenyl]-3-carboxylate**



Whitish oil; 69% yield (391 mg);  $R_f = 0.30$  (petroleum ether/ethyl acetate = 3:1, v/v).

IR ( $\text{cm}^{-1}$ , KBr): 3240, 1736, 1640, 1332, 1108, 881, 750, 701;  $^1\text{H}$  NMR ( $\text{CDCl}_3$ , 400 MHz)  $\delta$  (ppm) 8.08 (d,  $J = 1.7$  Hz, 1H), 8.02 (d,  $J = 7.8$  Hz, 1H), 7.73 (d,  $J = 7.1$  Hz, 1H), 7.63-7.56 (m, 2H), 7.46 (d,  $J = 7.5$  Hz, 1H), 7.39 (ddd,  $J = 12.3, 7.5, 4.3$  Hz, 2H), 5.38 (br, 1H), 4.37 (q,  $J = 7.1$  Hz, 2H), 2.68 (d,  $J = 4.9$  Hz, 3H), 1.38 (t,  $J = 7.1$  Hz, 3H);  $^{13}\text{C}$  NMR ( $\text{CDCl}_3$ , 100 MHz)  $\delta$  (ppm) 170.2, 166.4, 140.5, 138.5, 136.0, 134.7, 133.2, 131.4, 131.0, 130.3, 129.5, 128.9, 128.6, 126.9, 61.2, 26.7, 14.4; HRMS calcd for  $\text{C}_{17}\text{H}_{18}\text{NO}_3^+$   $[\text{M}+\text{H}]^+$  284.1287, Found 284.1288.

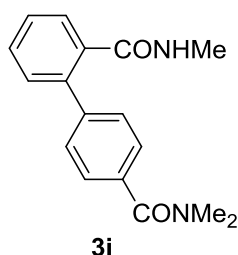

***N*<sup>2</sup>,*N*<sup>4'</sup>,*N*<sup>4'</sup>-Trimethyl-[1,1'-biphenyl]-2,4'-dicarboxamide**

Whitish oil; 67% yield (378 mg);  $R_f = 0.12$  (ethyl acetate).

IR ( $\text{cm}^{-1}$ , KBr): 3286, 1682, 1650, 850, 755;  $^1\text{H}$  NMR ( $\text{DMSO}-d_6$ , 400 MHz)  $\delta$  (ppm) 8.06 (br, 1H), 7.50 (ddd,  $J = 4.9, 4.5, 3.0$  Hz, 1H), 7.45-7.38 (m, 7H), 2.96 (d,  $J = 18.4$  Hz, 6H), 2.57 (d,  $J = 3.1$  Hz, 3H);  $^{13}\text{C}$  NMR ( $\text{DMSO}-d_6$ , 100 MHz)  $\delta$  (ppm) 170.5, 170.0, 141.7, 138.8, 137.8, 135.6, 130.3, 130.0, 128.6, 128.3, 128.0, 127.4, 35.3, 26.5; HRMS calcd for  $\text{C}_{17}\text{H}_{19}\text{N}_2\text{O}_2^+$   $[\text{M}+\text{H}]^+$  283.1447, Found 283.1438.

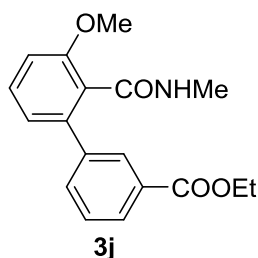

**Ethyl 3'-methoxy-2'-(methylcarbamoyl)-[1,1'-biphenyl]-3-carboxylate**

Whitish oil; 68% yield (426 mg);  $R_f = 0.25$  (petroleum ether/ethyl acetate = 3:1, v/v).

IR ( $\text{cm}^{-1}$ , KBr): 3228, 1740, 1645, 1328, 1108, 891, 680;  $^1\text{H}$  NMR ( $\text{CDCl}_3$ , 400 MHz)  $\delta$  (ppm) 8.11 (td,  $J = 1.9, 0.4$  Hz, 1H), 8.01 (ddd,  $J = 7.8, 1.6, 1.2$  Hz, 1H), 7.70 (ddd,  $J = 7.7, 1.9, 1.2$  Hz, 1H), 7.45 (td,  $J = 7.8, 0.4$  Hz, 1H), 7.40 (dd,  $J = 8.3, 7.8$  Hz,

1H), 7.01 (dd,  $J = 7.7, 0.9$  Hz, 1H), 6.95 (dd,  $J = 8.4, 0.8$  Hz, 1H), 5.47 (br, 1H), 4.41-4.36 (m, 2H), 3.88 (s, 3H), 2.73 (d,  $J = 4.9$  Hz, 3H), 1.40 (t,  $J = 7.1$  Hz, 3H);  $^{13}\text{C}$  NMR ( $\text{CDCl}_3$ , 100 MHz)  $\delta$  (ppm) 167.2, 165.6, 155.7, 139.4, 139.2, 132.0, 129.8, 129.4, 128.5, 127.8, 127.5, 125.2, 121.3, 109.5, 60.2, 55.1, 25.7, 13.5; HRMS calcd for  $\text{C}_{18}\text{H}_{20}\text{NO}_4^+$   $[\text{M}+\text{H}]^+$  314.1392, Found 314.1391.

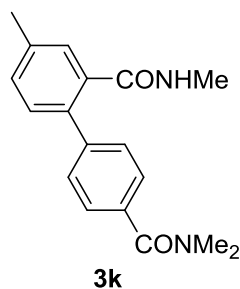

**$N^2,N^4',N^4,4$ -Tetramethyl-[1,1'-biphenyl]-2,4'-dicarboxamide**

Brown oil; 66% yield (391 mg);  $R_f = 0.11$  (ethyl acetate).

IR ( $\text{cm}^{-1}$ , KBr): 3290, 1680, 1645, 883, 822;  $^1\text{H}$  NMR ( $\text{CDCl}_3$ , 400 MHz)  $\delta$  (ppm) 7.39-7.34 (m, 5H), 7.21 (dt,  $J = 12.0, 2.9$  Hz, 2H), 5.56 (br, 1H), 3.00 (d,  $J = 34.9$  Hz, 6H), 2.61 (d,  $J = 3.3$  Hz, 3H), 2.33 (s, 3H);  $^{13}\text{C}$  NMR ( $\text{CDCl}_3$ , 100 MHz)  $\delta$  (ppm) 171.3, 170.5, 141.5, 138.0, 135.9, 135.6, 135.3, 130.9, 130.1, 129.3, 128.6, 127.4, 39.7, 35.5, 26.7, 21.0; HRMS calcd for  $\text{C}_{18}\text{H}_{21}\text{N}_2\text{O}_2^+$   $[\text{M}+\text{H}]^+$  297.1603, Found 297.1601.

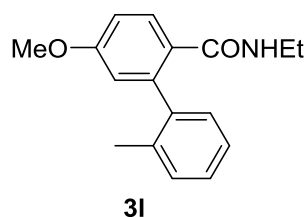

**$N$ -Ethyl-5-methoxy-2'-methyl-[1,1'-biphenyl]-2-carboxamide**

Whitish solid; 73% yield (393 mg); m.p. = 141  $^{\circ}\text{C}$ ;  $R_f = 0.34$  (petroleum ether/ethyl acetate = 2:1, v/v).

IR ( $\text{cm}^{-1}$ , KBr): 3291, 1645, 1599, 1045, 480;  $^1\text{H}$  NMR ( $\text{CDCl}_3$ , 400 MHz)  $\delta$  (ppm) 7.91 (d,  $J = 8.72$  Hz, 1H), 7.27-7.16 (m, 4H), 6.90 (dd,  $J = 8.68, 2.30$  Hz, 1H), 6.63 (d,  $J = 2.16$  Hz, 1H), 5.06 (br, 1H), 3.78 (s, 3H), 3.13-2.95 (m, 2H), 2.05 (s, 3H), 0.64 (t,  $J = 7.12$  Hz, 3H);  $^{13}\text{C}$  NMR ( $\text{CDCl}_3$ , 100 MHz)  $\delta$  (ppm) 167.4, 160.9, 140.8, 140.4, 136.3, 131.7, 130.5, 128.9, 128.3, 127.1, 126.3, 115.3, 113.0, 55.4, 34.4, 19.9, 13.9; HRMS calcd for  $\text{C}_{17}\text{H}_{19}\text{NNaO}_2^+$   $[\text{M}+\text{Na}]^+$  292.1313, Found 292.1306.

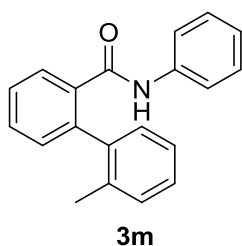

**2'-Methyl-N-phenyl-[1,1'-biphenyl]-2-carboxamide<sup>[4]</sup>**

Whitish solid; 76% yield (437 mg); m. p. = 138 °C (lit., 134-136 °C);  $R_f$  = 0.50 (petroleum ether/ethyl acetate = 10:1, v/v).

IR (cm<sup>-1</sup>, KBr): 3063, 1651, 1441, 751, 690, 511; <sup>1</sup>H NMR (CDCl<sub>3</sub>, 400 MHz)  $\delta$  (ppm) 8.10 (d,  $J$  = 6.40 Hz, 1H), 7.53-7.46 (m, 2H), 7.36-7.30 (m, 4H), 7.23 (d,  $J$  = 6.12 Hz, 1H), 7.18-7.11 (m, 3H), 7.01-6.99 (m, 3H), 2.09 (s, 3H); <sup>13</sup>C NMR (CDCl<sub>3</sub>, 100 MHz)  $\delta$  (ppm) 165.7, 140.0, 139.1, 137.7, 136.6, 134.3, 131.0, 130.9, 130.5, 130.2, 129.3, 128.8, 128.7, 128.1, 126.7, 124.2, 119.7, 20.0.

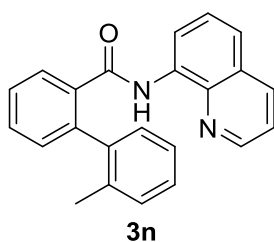

**2'-Methyl-N-(quinolin-8-yl)-[1,1'-biphenyl]-2-carboxamide**

Yellow oil; 88% yield (596 mg);  $R_f$  = 0.32 (petroleum ether/ethyl acetate = 20:1, v/v)

IR (cm<sup>-1</sup>, KBr): 3047, 1682, 1520, 1068, 868, 667; <sup>1</sup>H NMR (CDCl<sub>3</sub>, 400 MHz)  $\delta$  (ppm) 9.82 (br, 1H), 8.79 (d,  $J$  = 7.44 Hz, 1H), 8.57 (d,  $J$  = 4.00 Hz, 1H), 8.07 (d,  $J$  = 8.20 Hz, 1H), 8.03 (dd,  $J$  = 7.28, 1.24 Hz, 1H), 7.57-7.43 (m, 4H), 7.38-7.32 (m, 3H), 7.21-7.11 (m, 3H), 2.26 (s, 3H); <sup>13</sup>C NMR (CDCl<sub>3</sub>, 100 MHz)  $\delta$  (ppm) 167.2, 147.6, 140.0, 139.8, 138.2, 136.1, 134.7, 131.2, 130.3, 130.0, 129.9, 129.4, 127.8, 127.7, 127.6, 127.4, 126.7, 125.9, 121.9, 121.5, 121.3, 116.4, 20.3; HRMS calcd for C<sub>23</sub>H<sub>19</sub>N<sub>2</sub>O<sup>+</sup> [M+H]<sup>+</sup> 339.1497, Found 339.1490.

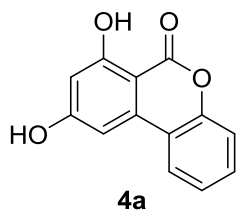

**7,9-Dihydroxy-6H-benzo[c]chromen-6-one<sup>[6]</sup>**

Whitish solid; 65% yield (297 mg); m.p. = 267-269 °C;  $R_f$  = 0.11 (petroleum ether/ethyl acetate = 5:1, v/v).

IR (cm<sup>-1</sup>, KBr): 3231, 1685, 1610, 1460, 1278; <sup>1</sup>H NMR (DMSO-*d*<sub>6</sub>, 600 MHz)  $\delta$  (ppm) 11.32 (s, 1H), 11.05 (s, 1H), 8.16 (d,  $J$  = 8.0 Hz, 1H), 7.57 (t,  $J$  = 7.7 Hz, 1H), 7.41 (dd,  $J$  = 16.5, 8.1 Hz, 2H), 7.19 (d,  $J$  = 1.7 Hz, 1H), 6.48 (d,  $J$  = 2.0 Hz, 1H); <sup>13</sup>C NMR (DMSO-*d*<sub>6</sub>, 100 MHz)  $\delta$  (ppm) 166.8, 165.2, 164.5, 151.1, 137.6, 132.0, 126.2, 124.9, 118.7, 118.3, 103.6, 101.7, 99.3.

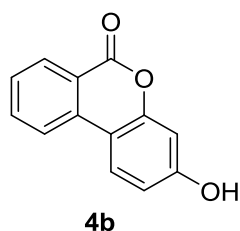

**3-Hydroxy-6H-benzo[c]chromen-6-one<sup>[7]</sup>**

Brown solid; 68% yield (289 mg); m.p. = 205-206 °C (lit. 207 °C);  $R_f$  = 0.15 (petroleum ether/ethyl acetate = 5:1, v/v).

IR (cm<sup>-1</sup>, KBr): 3260, 1690, 1620, 1604, 1322, 1278; <sup>1</sup>H NMR (DMSO-*d*<sub>6</sub>, 400 MHz)  $\delta$  (ppm) 10.31 (s, 1H), 8.23 (d,  $J$  = 5.4 Hz, 1H), 8.15 (dd,  $J$  = 8.5, 3.3 Hz, 2H), 7.85 (ddd,  $J$  = 5.5, 4.9, 0.9 Hz, 1H), 7.56-7.50 (m, 1H), 6.81 (dd,  $J$  = 5.8, 1.6 Hz, 1H), 6.72 (d,  $J$  = 1.6 Hz, 1H); <sup>13</sup>C NMR (DMSO-*d*<sub>6</sub>, 150 MHz)  $\delta$  (ppm) 161.2, 160.4, 152.7, 135.8, 135.7, 130.2, 128.2, 125.4, 122.2, 119.5, 113.7, 109.9, 103.5.

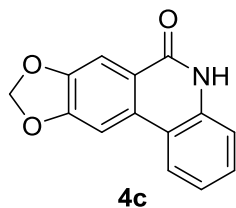

**[1,3]Dioxolo[4,5-*j*]phenanthridin-6(5H)-one<sup>[8]</sup>**

Whitish solid; 68% yield (325 mg); m.p. >300 °C;  $R_f$  = 0.10 (petroleum ether/ethyl acetate = 1:1, v/v).

IR (cm<sup>-1</sup>, KBr): 1660, 1580, 1471, 1422, 1248, 1009; <sup>1</sup>H NMR (CDCl<sub>3</sub>, 400 MHz)  $\delta$  (ppm) 11.61 (br, 1H), 8.28 (d,  $J$  = 5.0 Hz, 1H), 8.02 (s, 1H), 7.62 (s, 1H), 7.41 (t,  $J$  = 5.0 Hz, 1H), 7.32 (d,  $J$  = 5.4 Hz, 1H), 7.21 (t,  $J$  = 5.0 Hz, 1H), 6.21 (s, 2H); <sup>13</sup>C NMR (CDCl<sub>3</sub>, 100 MHz)  $\delta$  (ppm) 160.2, 152.2, 148.1, 135.9, 131.3, 128.7, 123.2, 122.1, 121.1, 117.8, 115.9, 105.1, 102.3, 101.6.

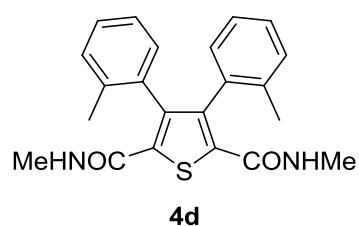

***N*<sup>2</sup>,*N*<sup>5</sup>-Dimethyl-3,4-di-*o*-tolylthiophene-2,5-dicarboxamide**

Yellow oil; 62% yield (469 mg);  $R_f$  = 0.12 (petroleum ether/ethyl acetate = 1:2, v/v).

IR (cm<sup>-1</sup>, KBr): 3300, 3120, 1650, 1537, 1414, 740, 695; <sup>1</sup>H NMR (DMSO-*d*<sub>6</sub>, 400 MHz)  $\delta$  (ppm) 8.14 (br, 2H), 7.31 (m, 4H), 7.26-7.17 (m, 4H), 2.74 (d,  $J$  = 4.8 Hz, 6H), 2.32 (s, 6H); <sup>13</sup>C NMR (DMSO-*d*<sub>6</sub>, 100 MHz)  $\delta$  (ppm) 165.3, 145.6, 138.3, 136.5, 132.3, 130.7, 130.1, 127.8, 127.0, 27.2, 21.6; HRMS calcd for C<sub>22</sub>H<sub>23</sub>N<sub>2</sub>O<sub>2</sub>S<sup>+</sup> [M+H]<sup>+</sup> 379.1480, Found 379.1483.

## 10. References

- [1] Krasovskiy, A.; Knochel, P. A LiCl-Mediated Br/Mg Exchange Reaction for the Preparation of Functionalized Aryl- and Heteroarylmagnesium Compounds from Organic Bromides. *Angew. Chem. Int. Ed.* **2004**, *43*, 3333.
- [2] Krasovskiy, A.; Knochel, P. Convenient Titration Method for Organometallic Zinc, Magnesium, and Lanthanide Reagents. *Synthesis*, **2006**, 890.
- [3] Zaitsev, K. V.; Karlov, S. S.; Selina, A. A.; Oprunenko, Y. F.; Churakov, A. V.; Neumueller, B.; Howard, J. A. K.; Zaitseva, G. S. Titanium complexes of dialkanolamine ligands: Synthesis and structure. *Eur. J. Inorg. Chem.* **2006**, *2006*, 1987–1999
- [4] Li, J.; Ackermann, L. Cobalt-catalyzed C-H arylations with weakly-coordinating amides and tetrazoles: expedient route to angiotensin-II-receptor blockers. *Chem. - Eur. J.* **2015**, *21*, 5718-22.
- [5] Zhang, R.; Zhao, Y.; Liu, K.-M.; Duan, X.-F. Phenolate Enabled General and Selective Fe/Ti Cocatalyzed Biaryl Cross-Couplings between Aryl Halides and Aryl Grignard Reagents. *Org. Lett.* **2018**, *20*, 7942-7946.
- [6] Zhang, W.; Wilke, B. I.; Zhan, J.; Watanabe, K.; Boddy, C. N.; Tang, Y. A New Mechanism for Benzopyrone Formation in Aromatic Polyketide Biosynthesis. *J. Am. Chem. Soc.* **2007**, *129*, 9304-9305.
- [7] Zhang, L.; Zhang, Z.; Hong, J.; Yu, J.; Zhang, J.; Mo, F. Oxidant-Free C(sp<sup>2</sup>)-H Functionalization/C-O Bond Formation: A Kolbe Oxidative Cyclization Process. *J. Org. Chem.* **2018**, *83*, 3200-3207.
- [8] Zhang, T.-Y.; Lin, J.-B.; Li, Q.-Z.; Kang, J.-C.; Pan, J.-L.; Hou, S.-H.; Chen, C.; Zhang, S.-Y. Copper-Catalyzed Selective ortho-C-H/N-H Annulation of Benzamides with Arynes: Synthesis of Phenanthridinone Alkaloids. *Org. Lett.* **2017**, *19*, 1764-1767.

# 11. $^1\text{H}$ and $^{13}\text{C}$ NMR spectra for products

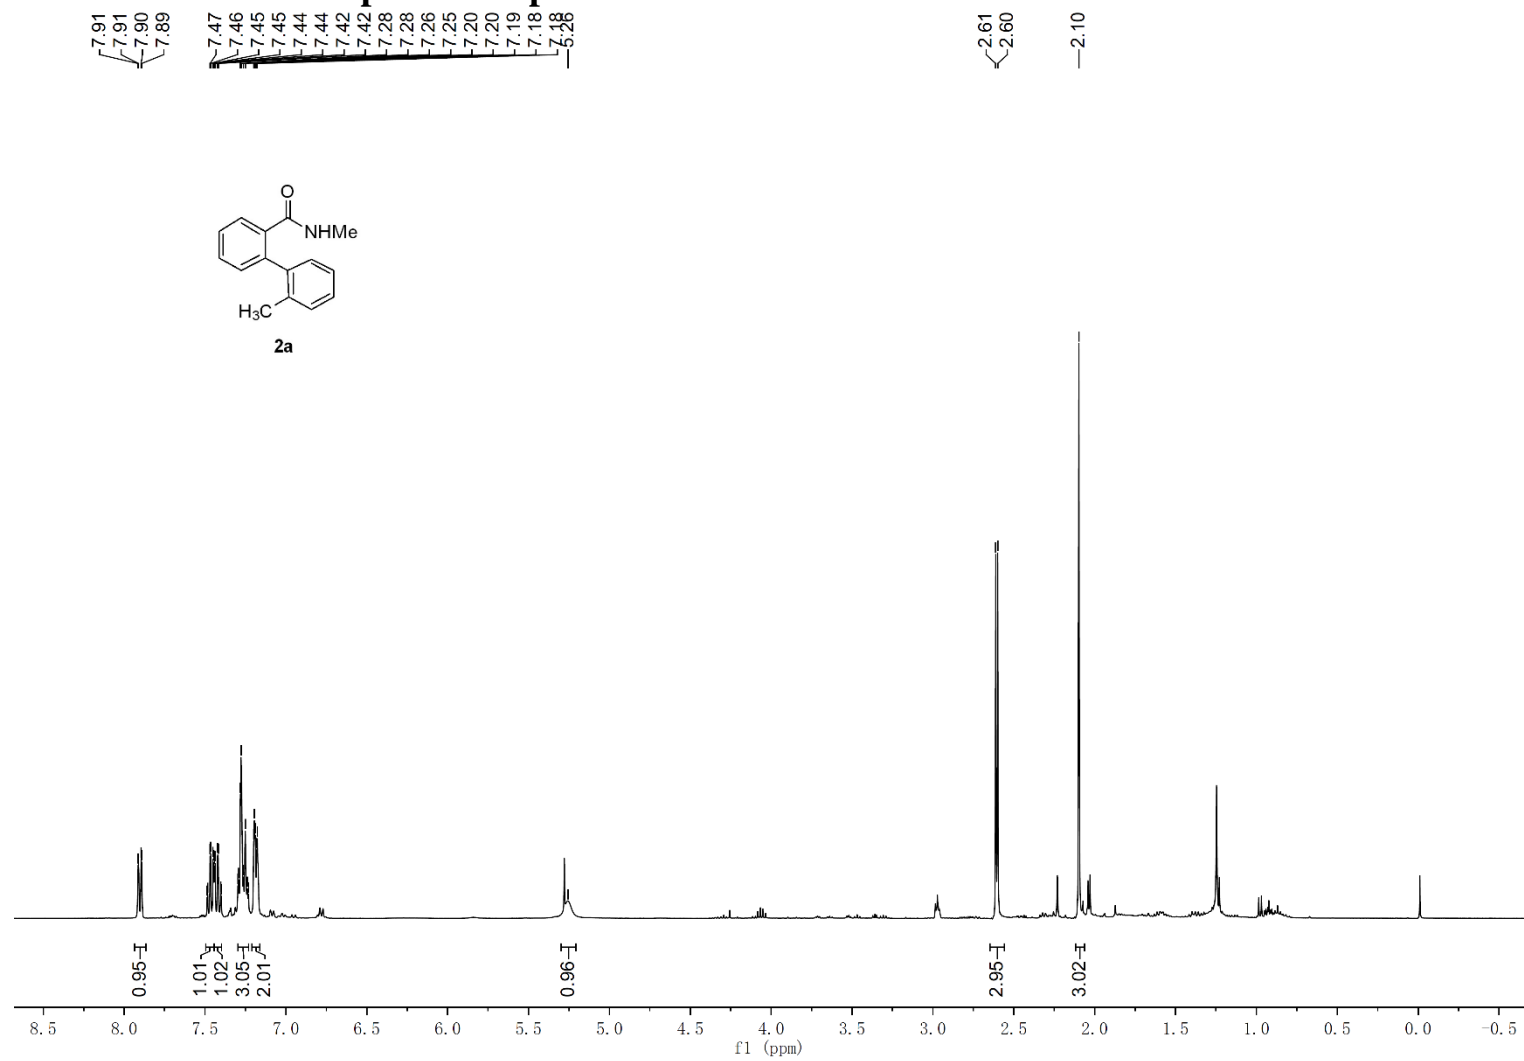

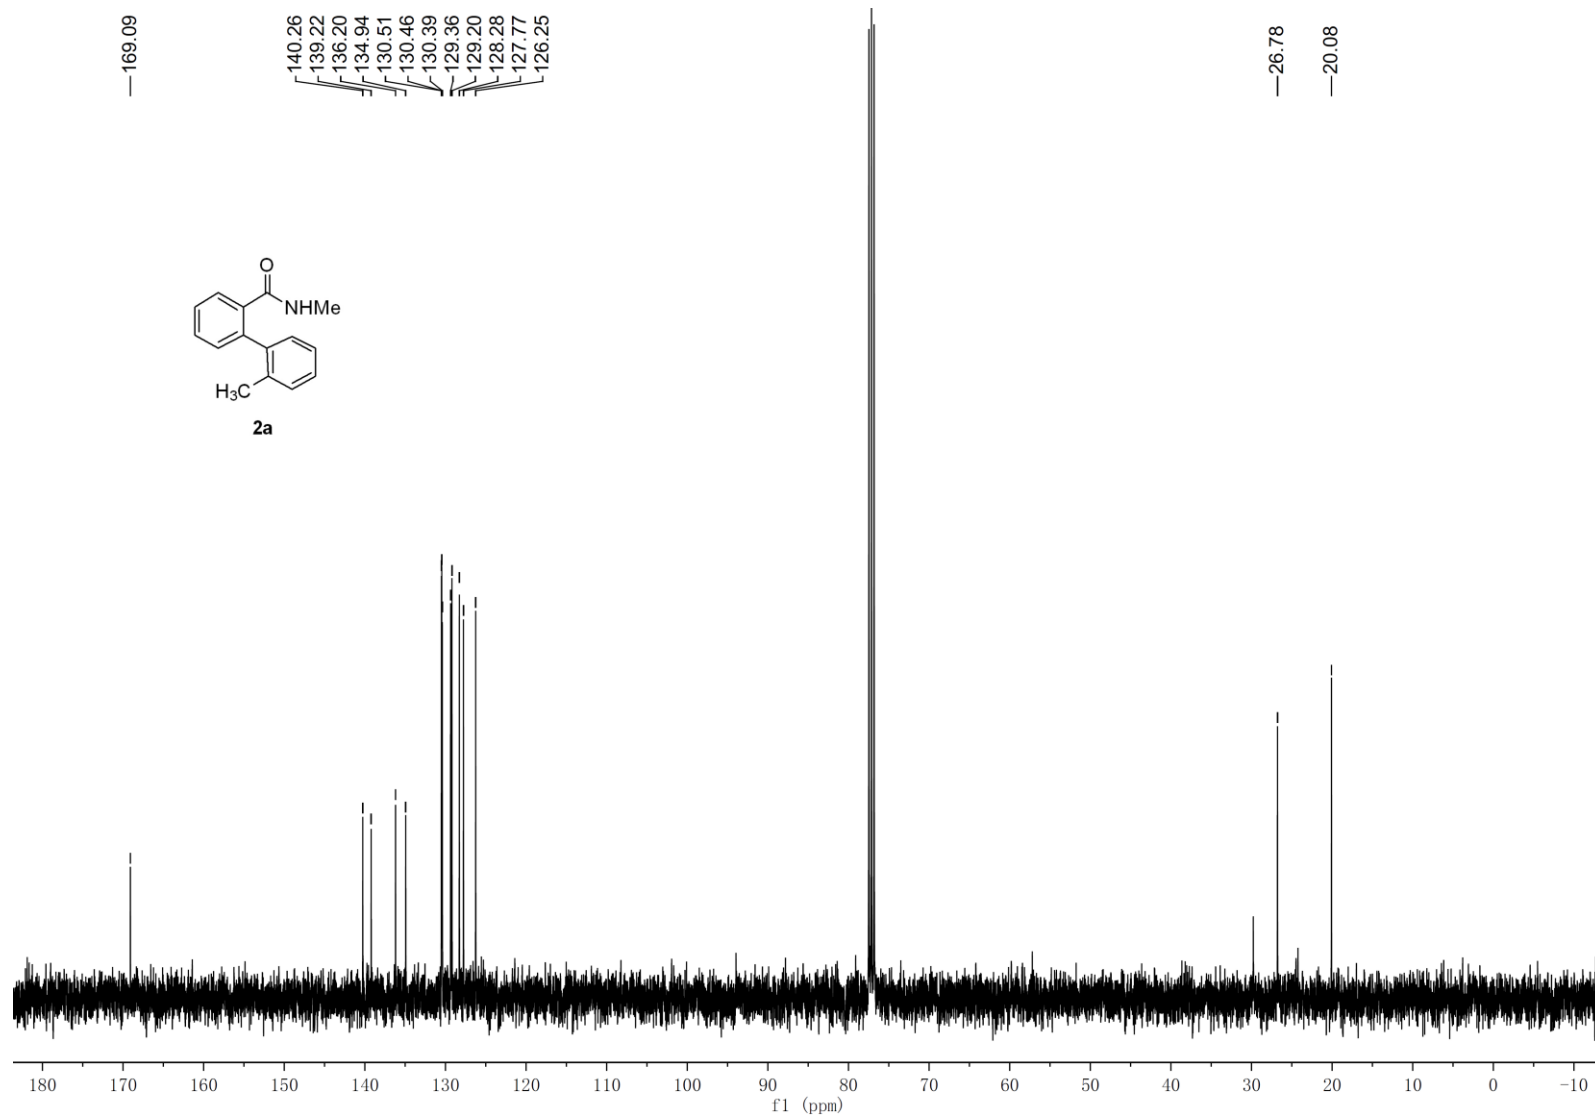



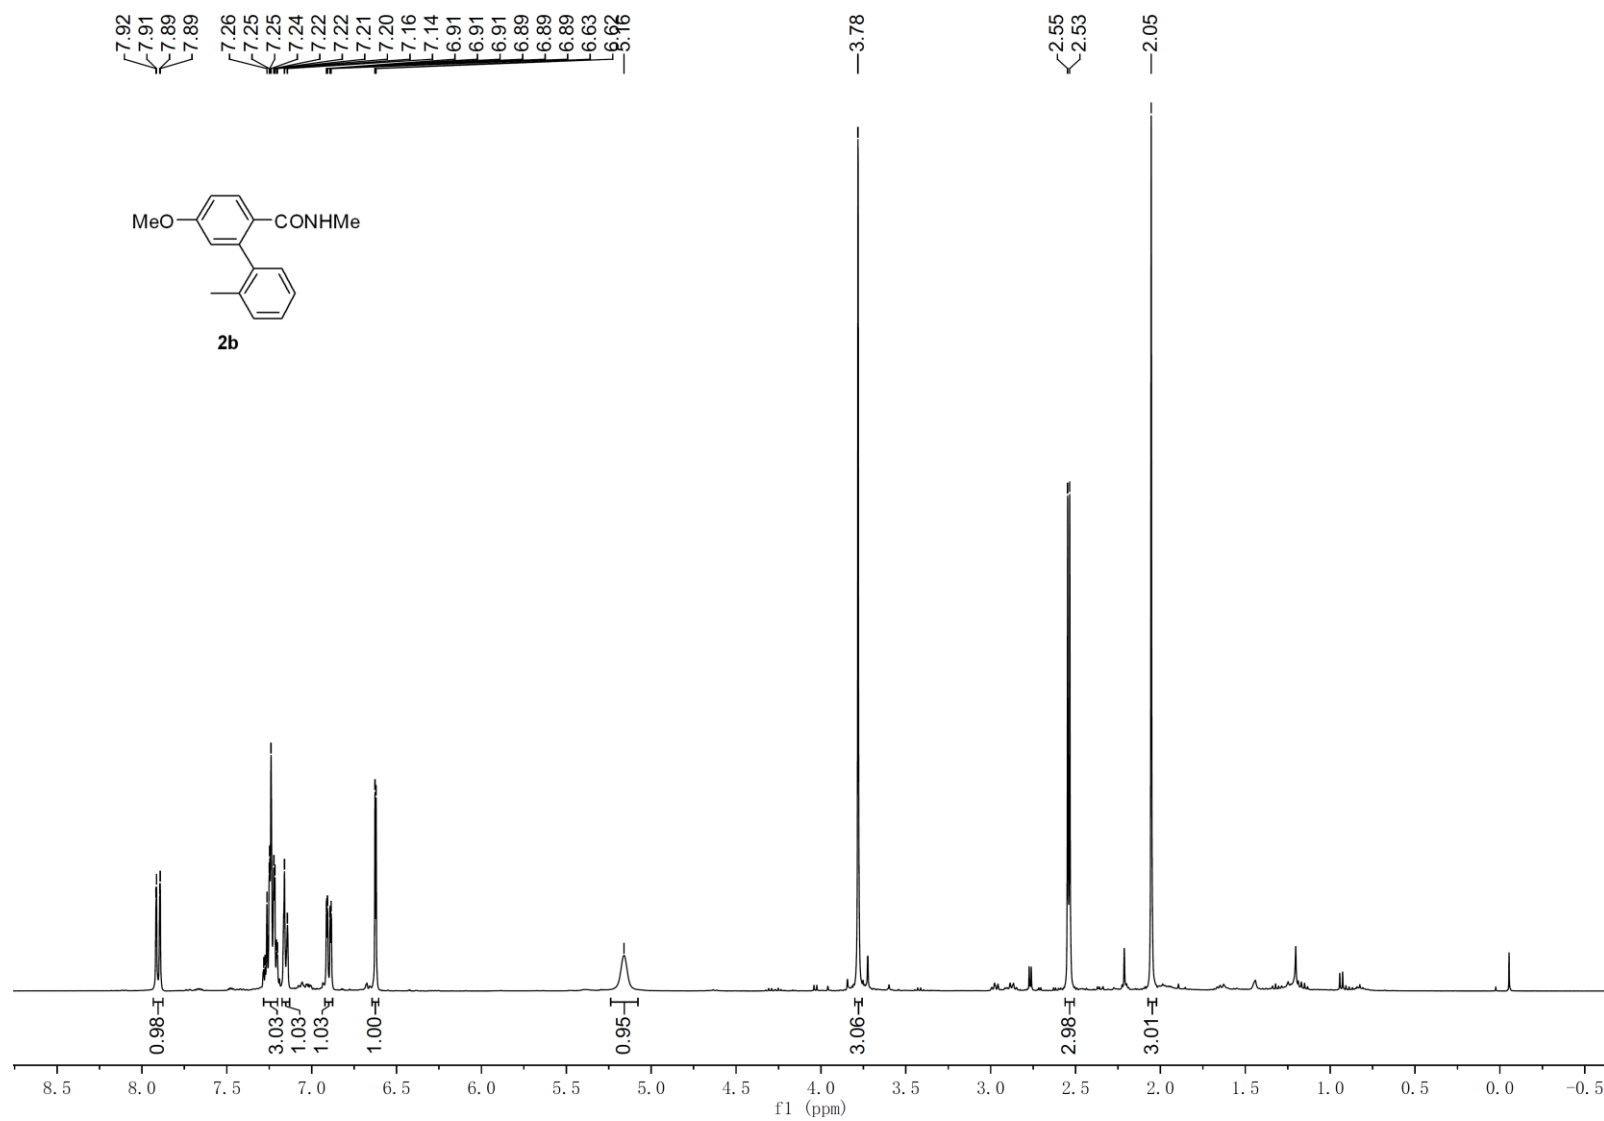

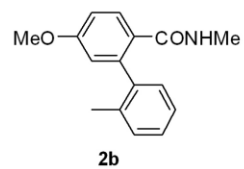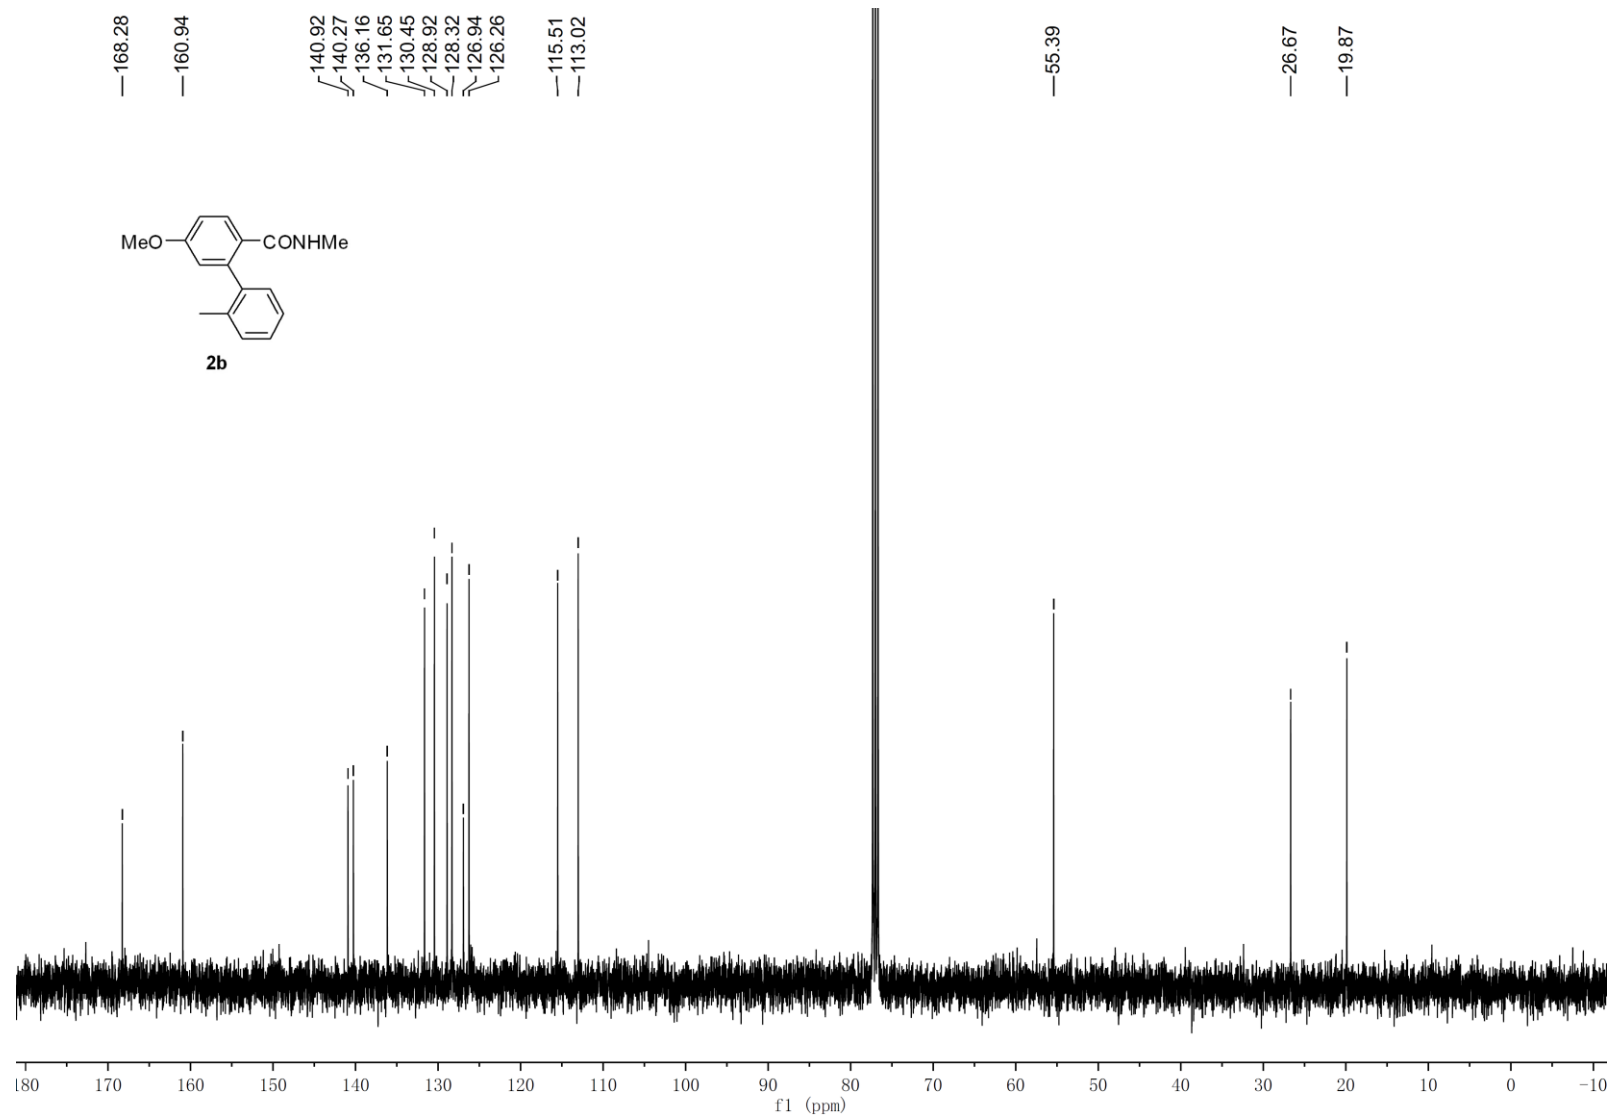

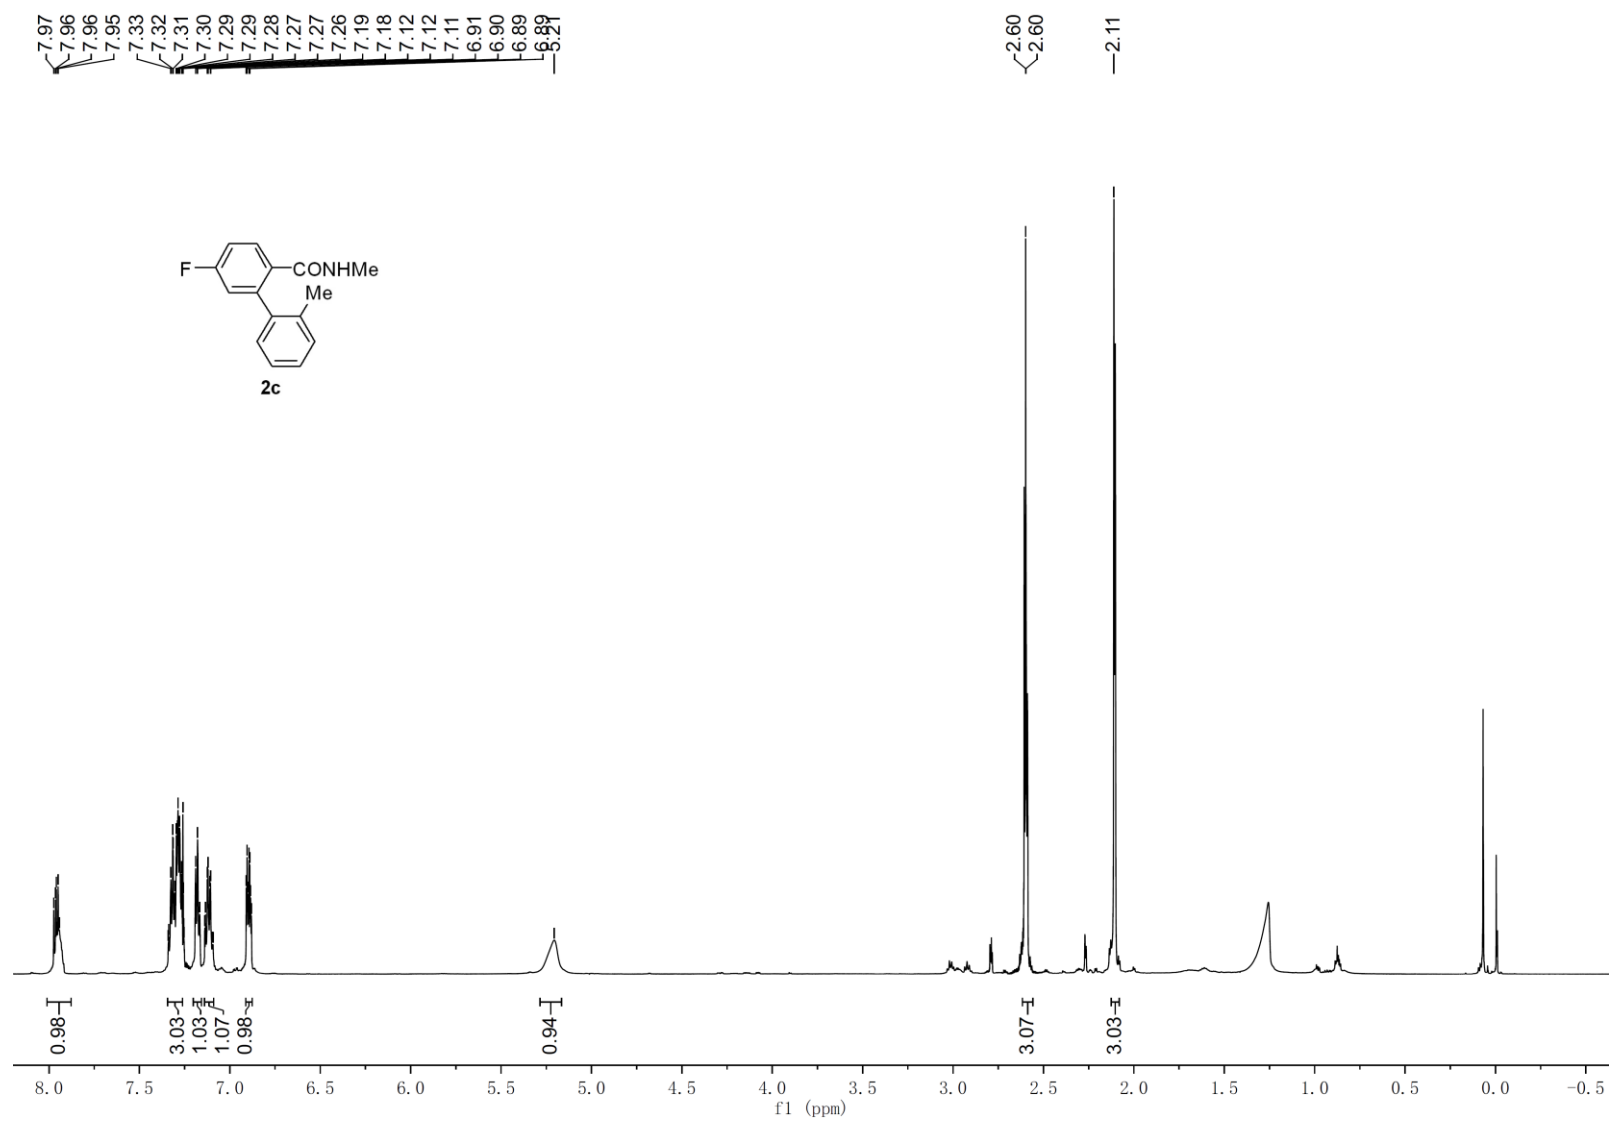

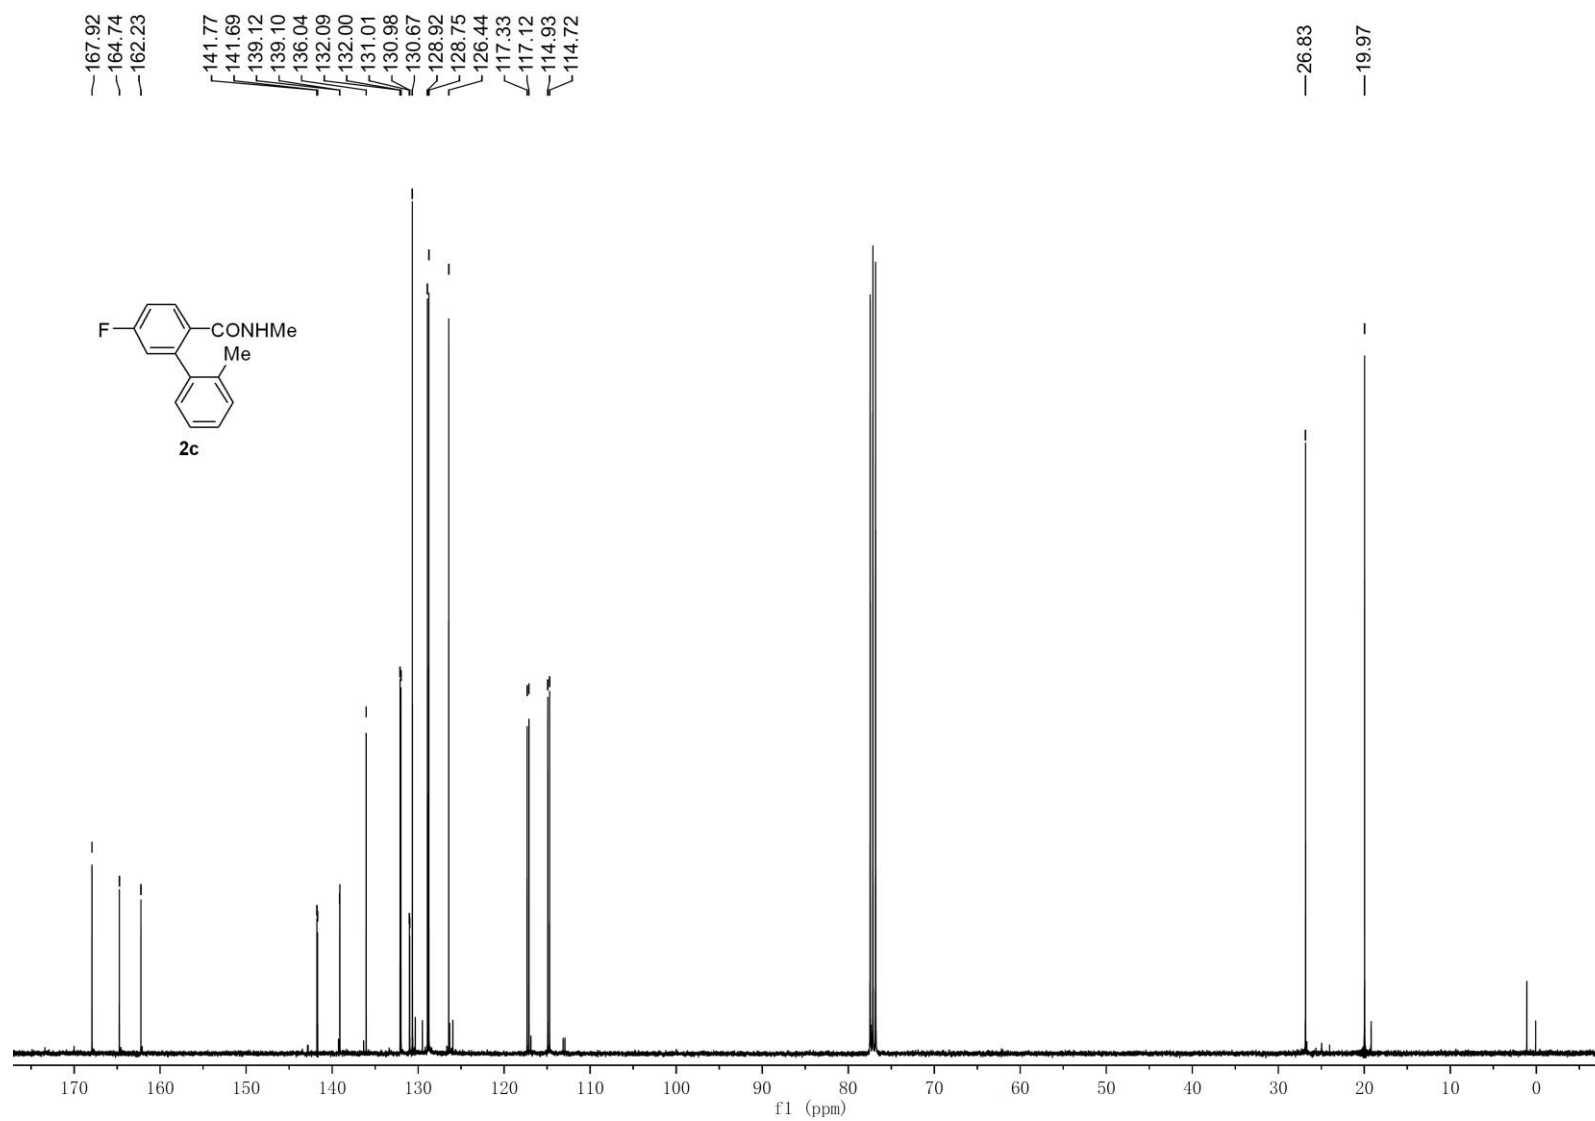

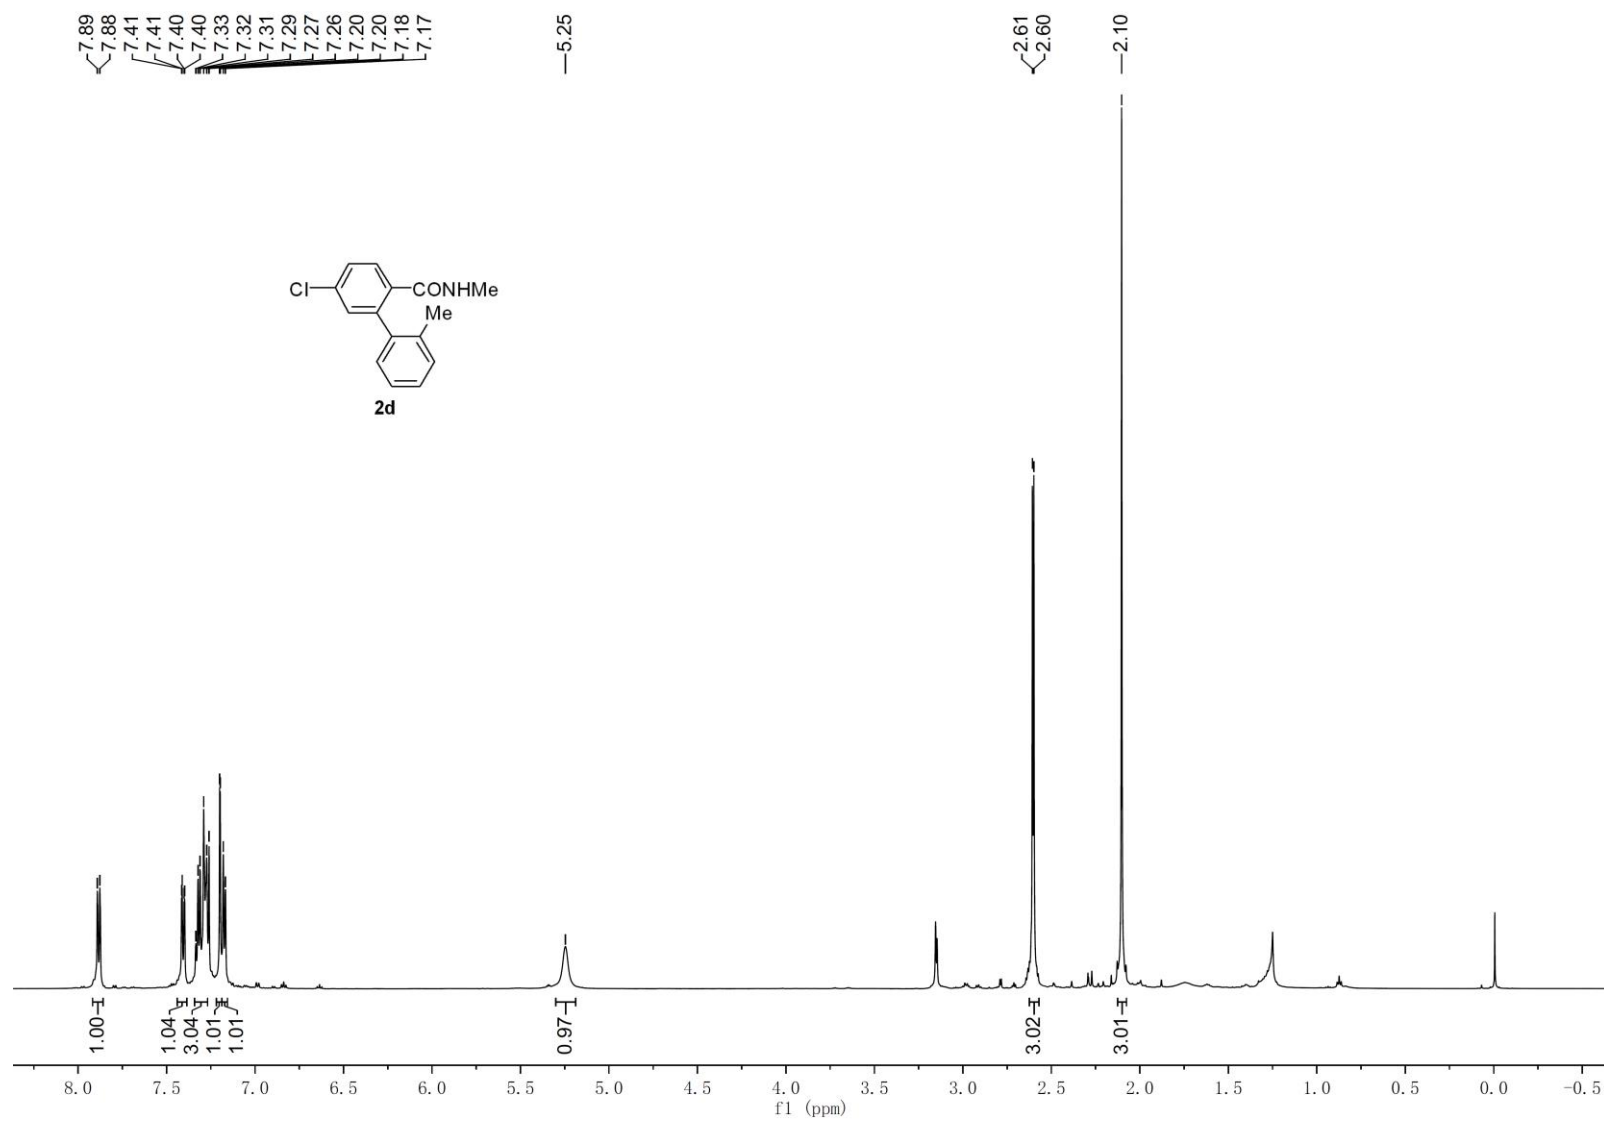

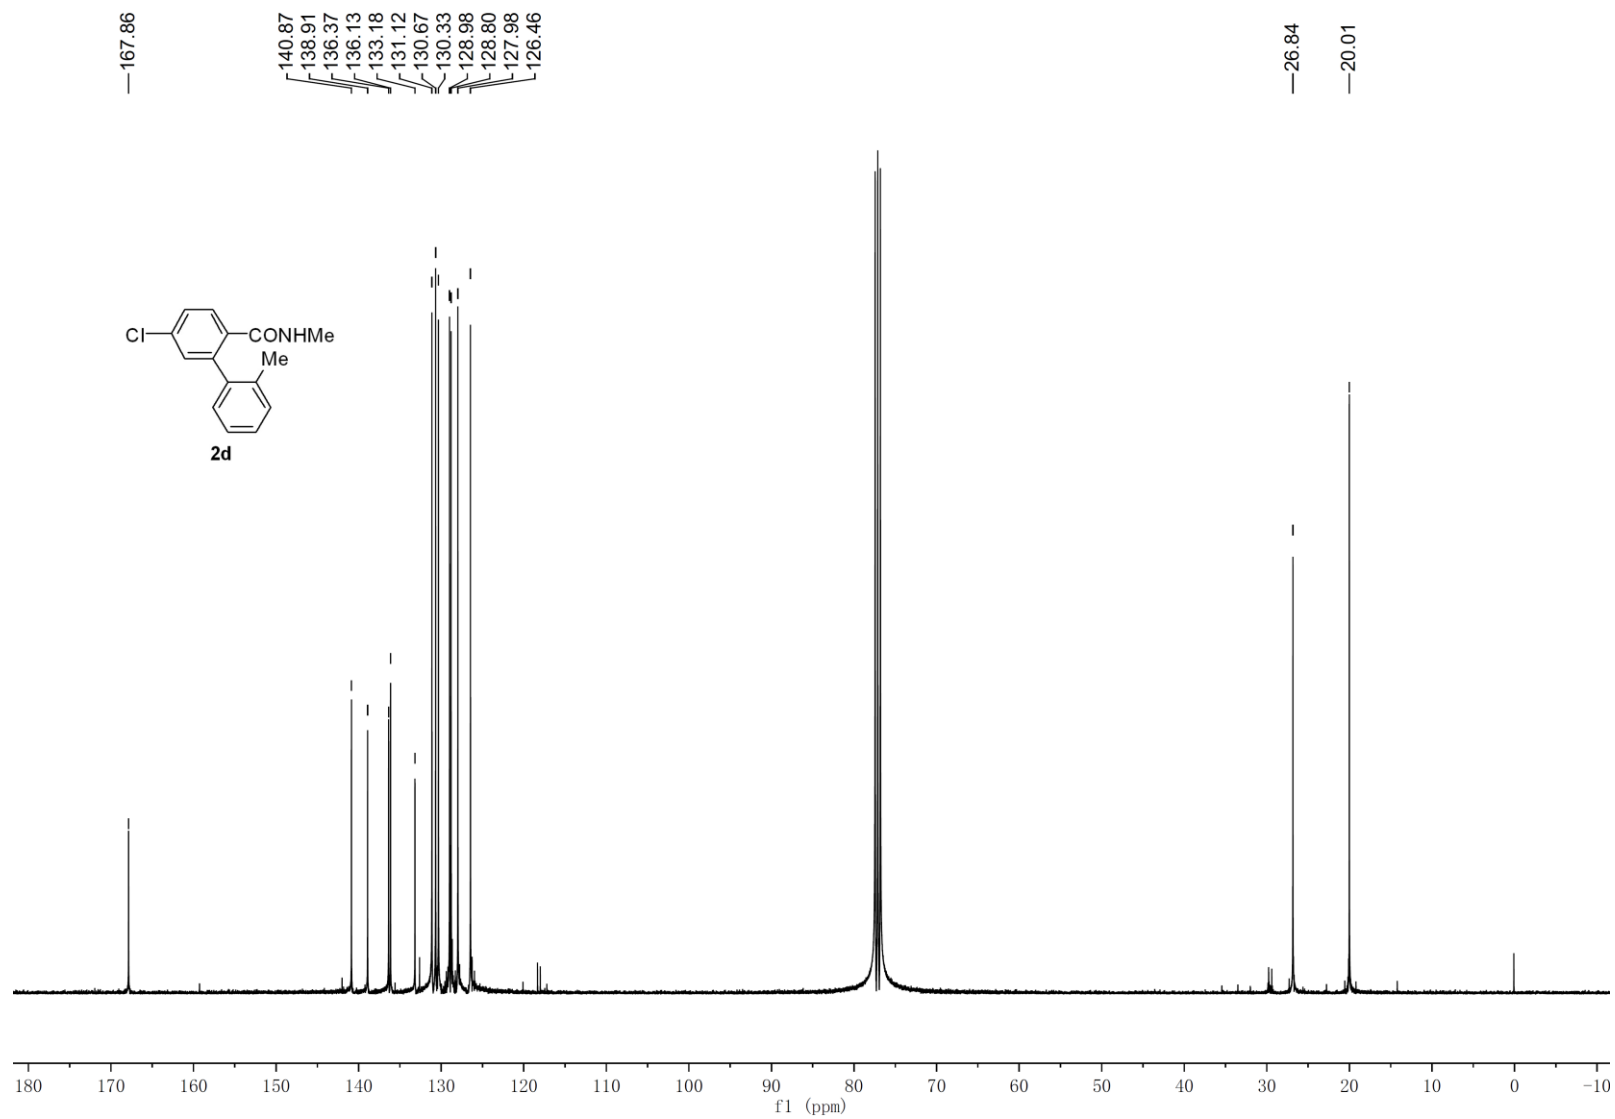

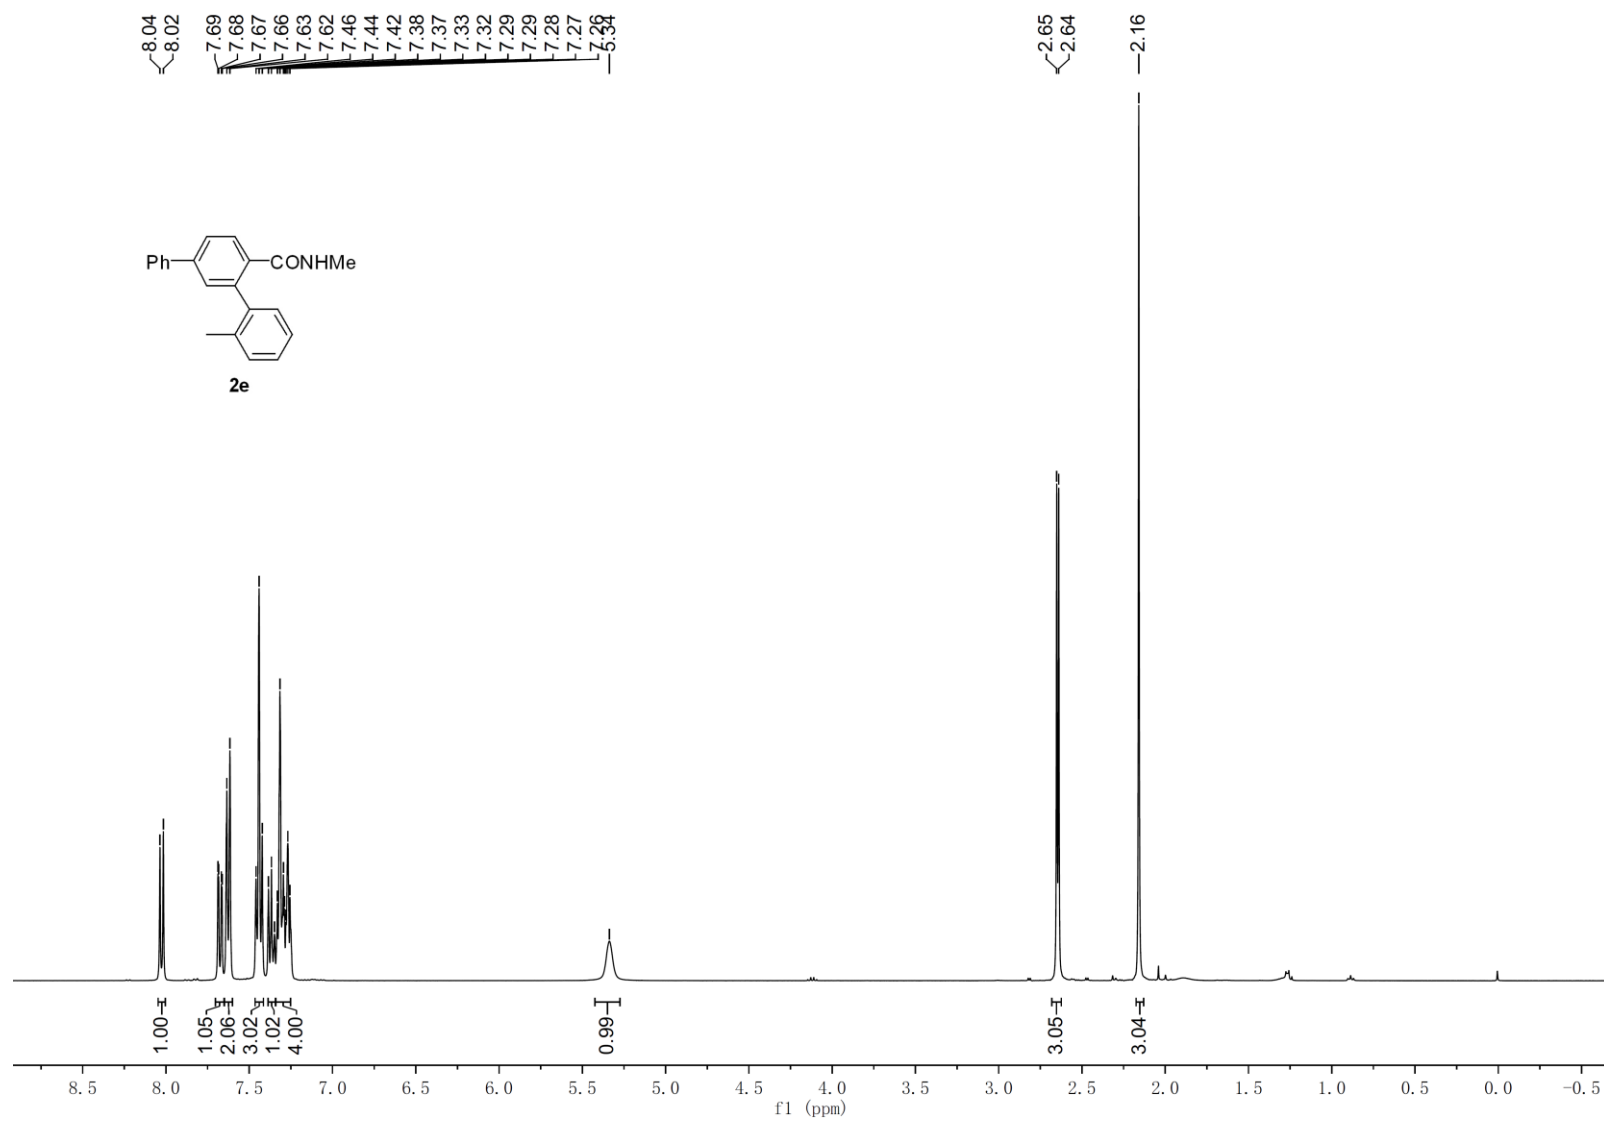

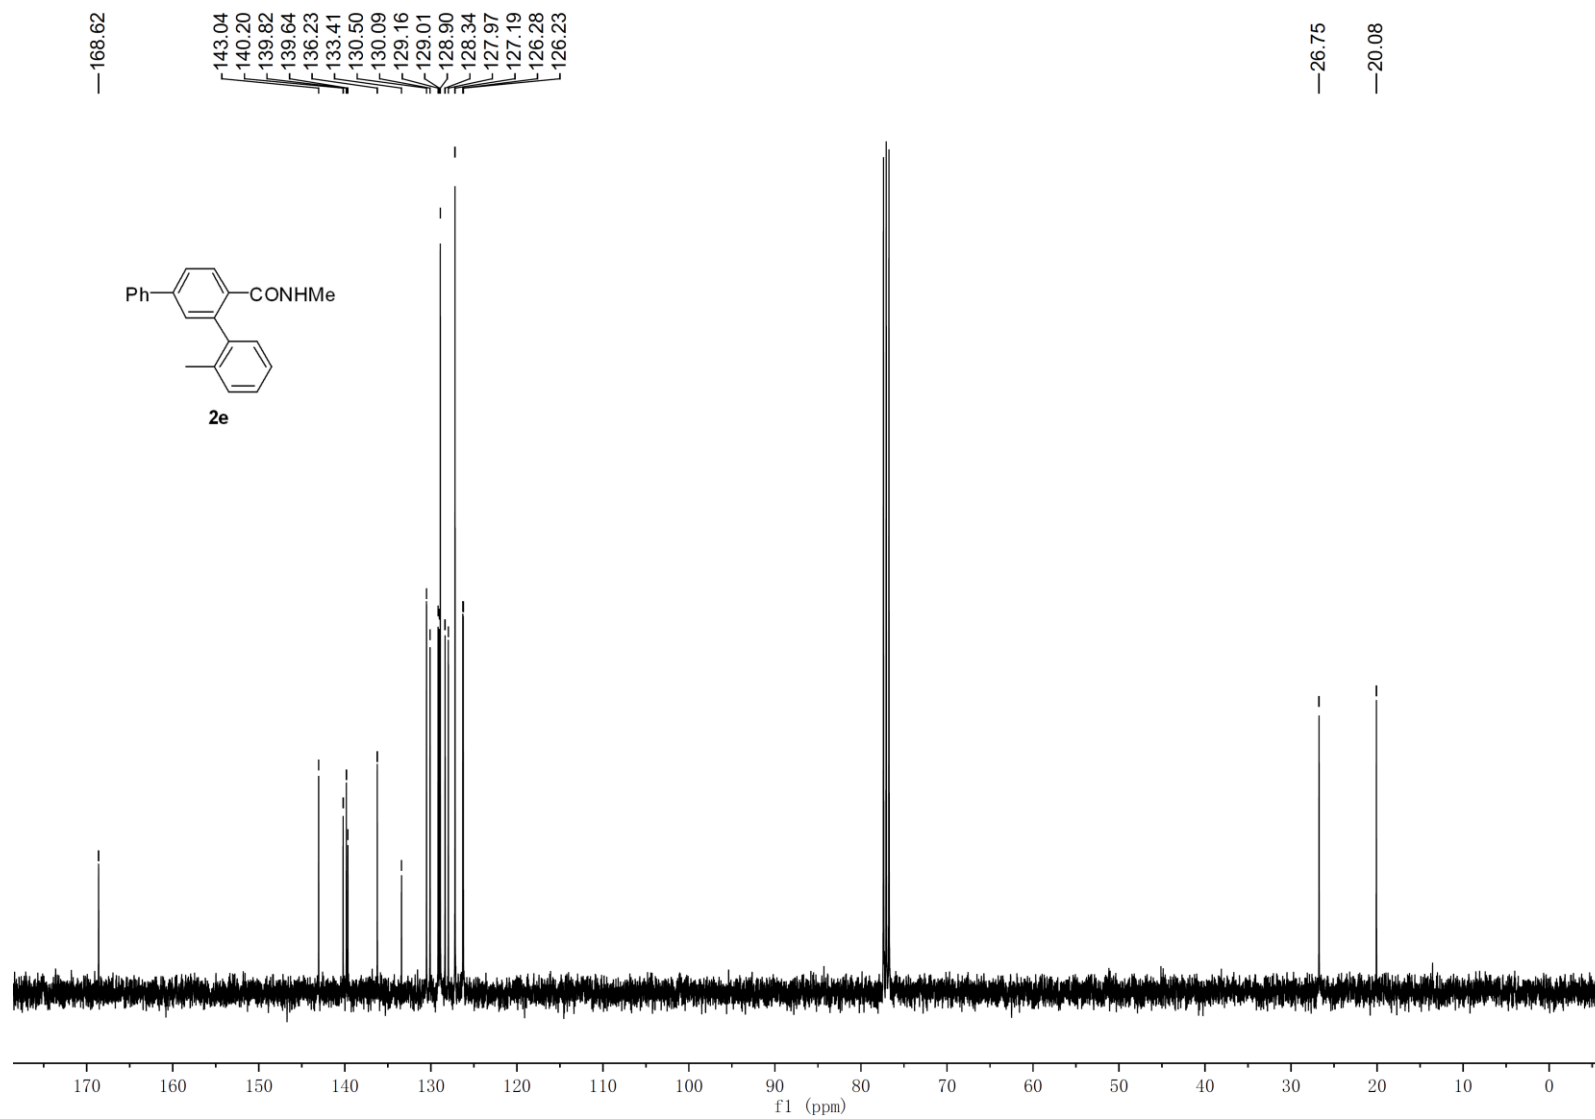



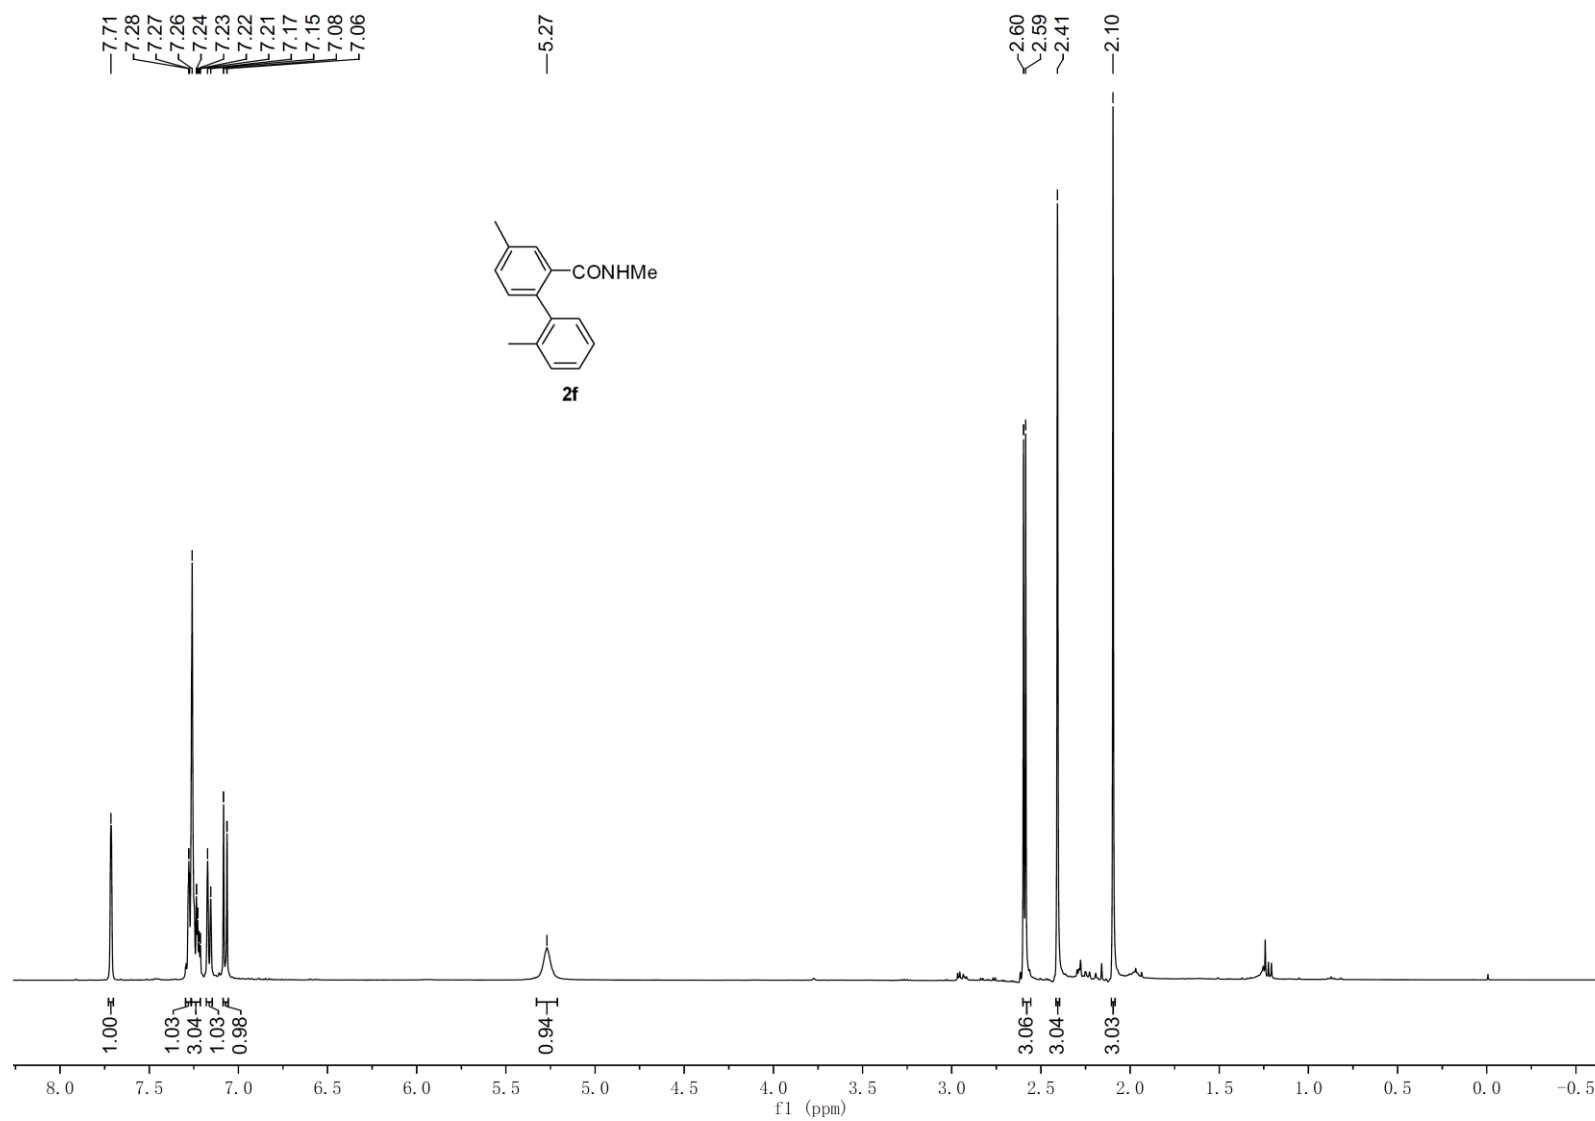

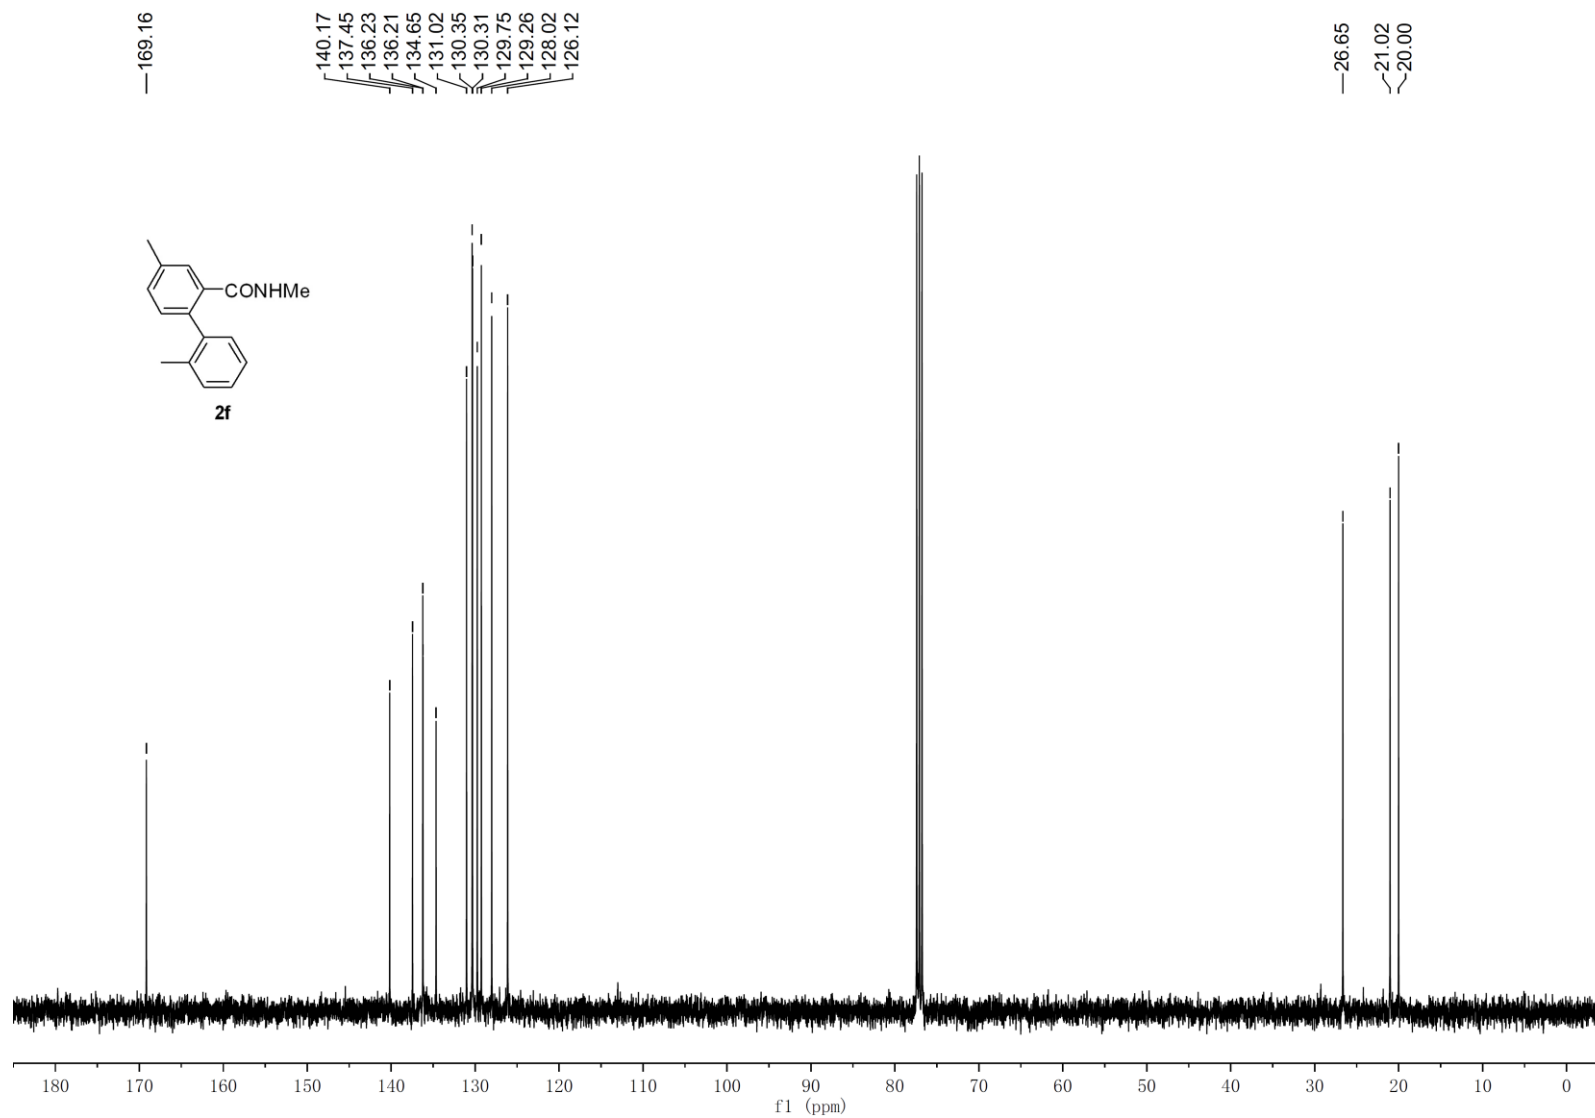

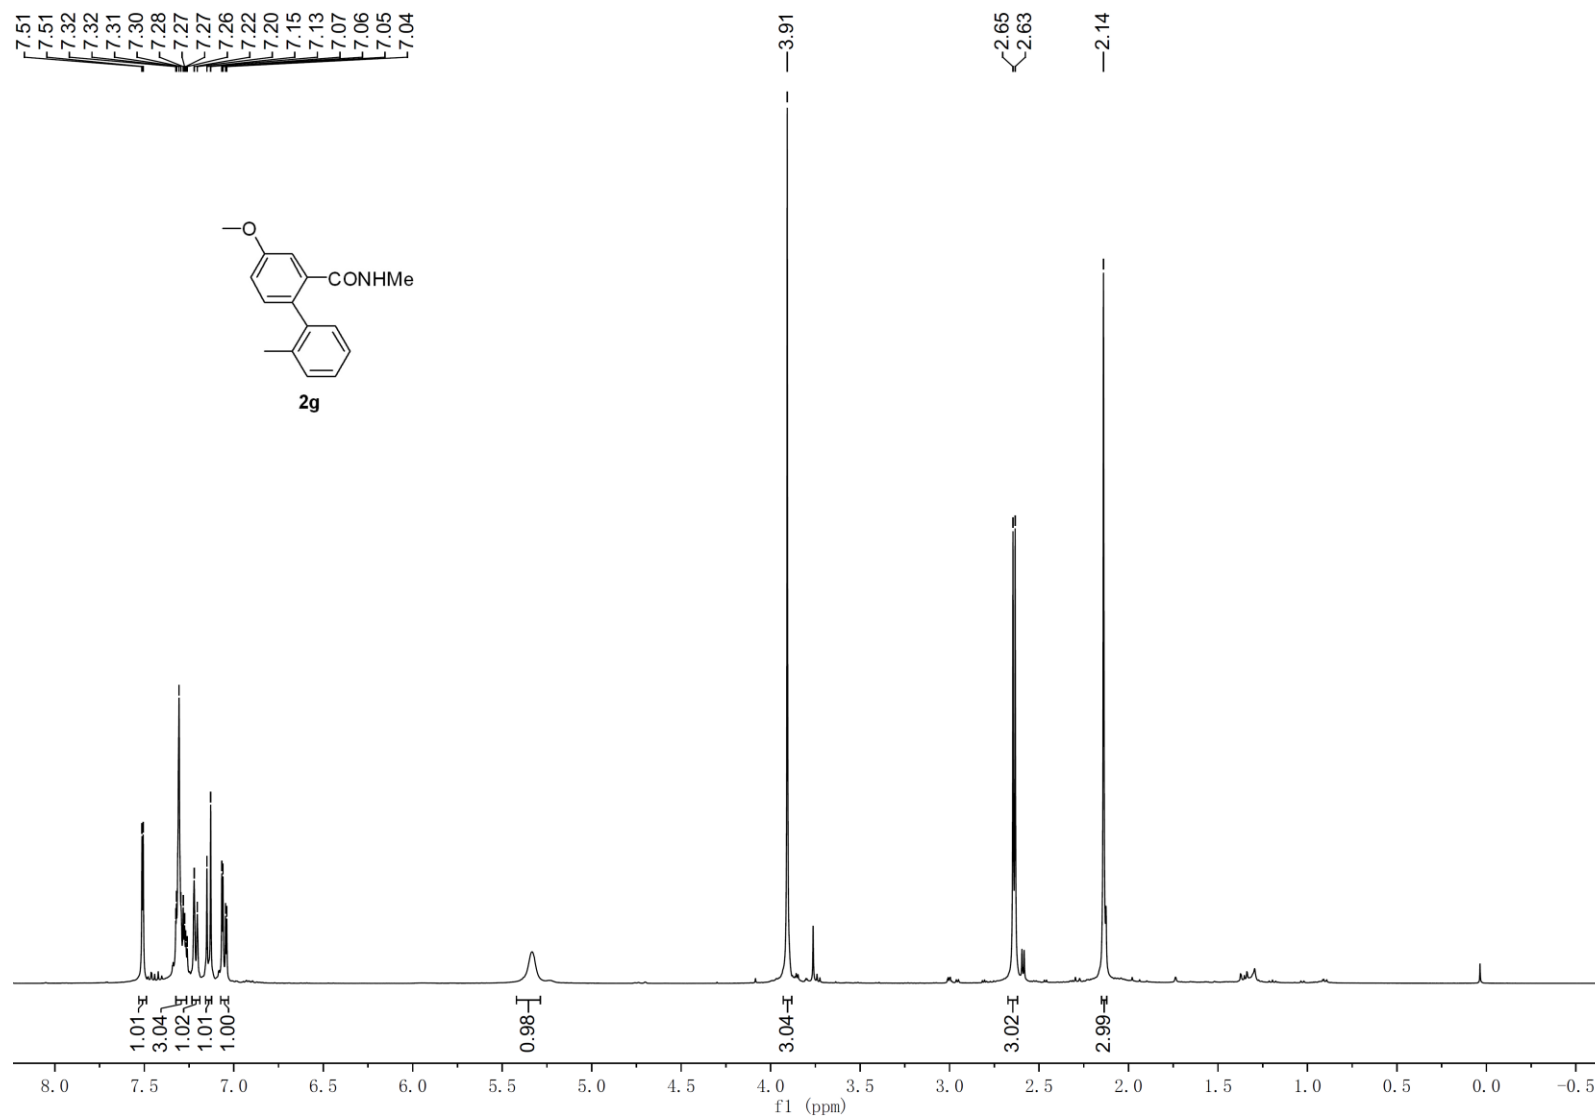

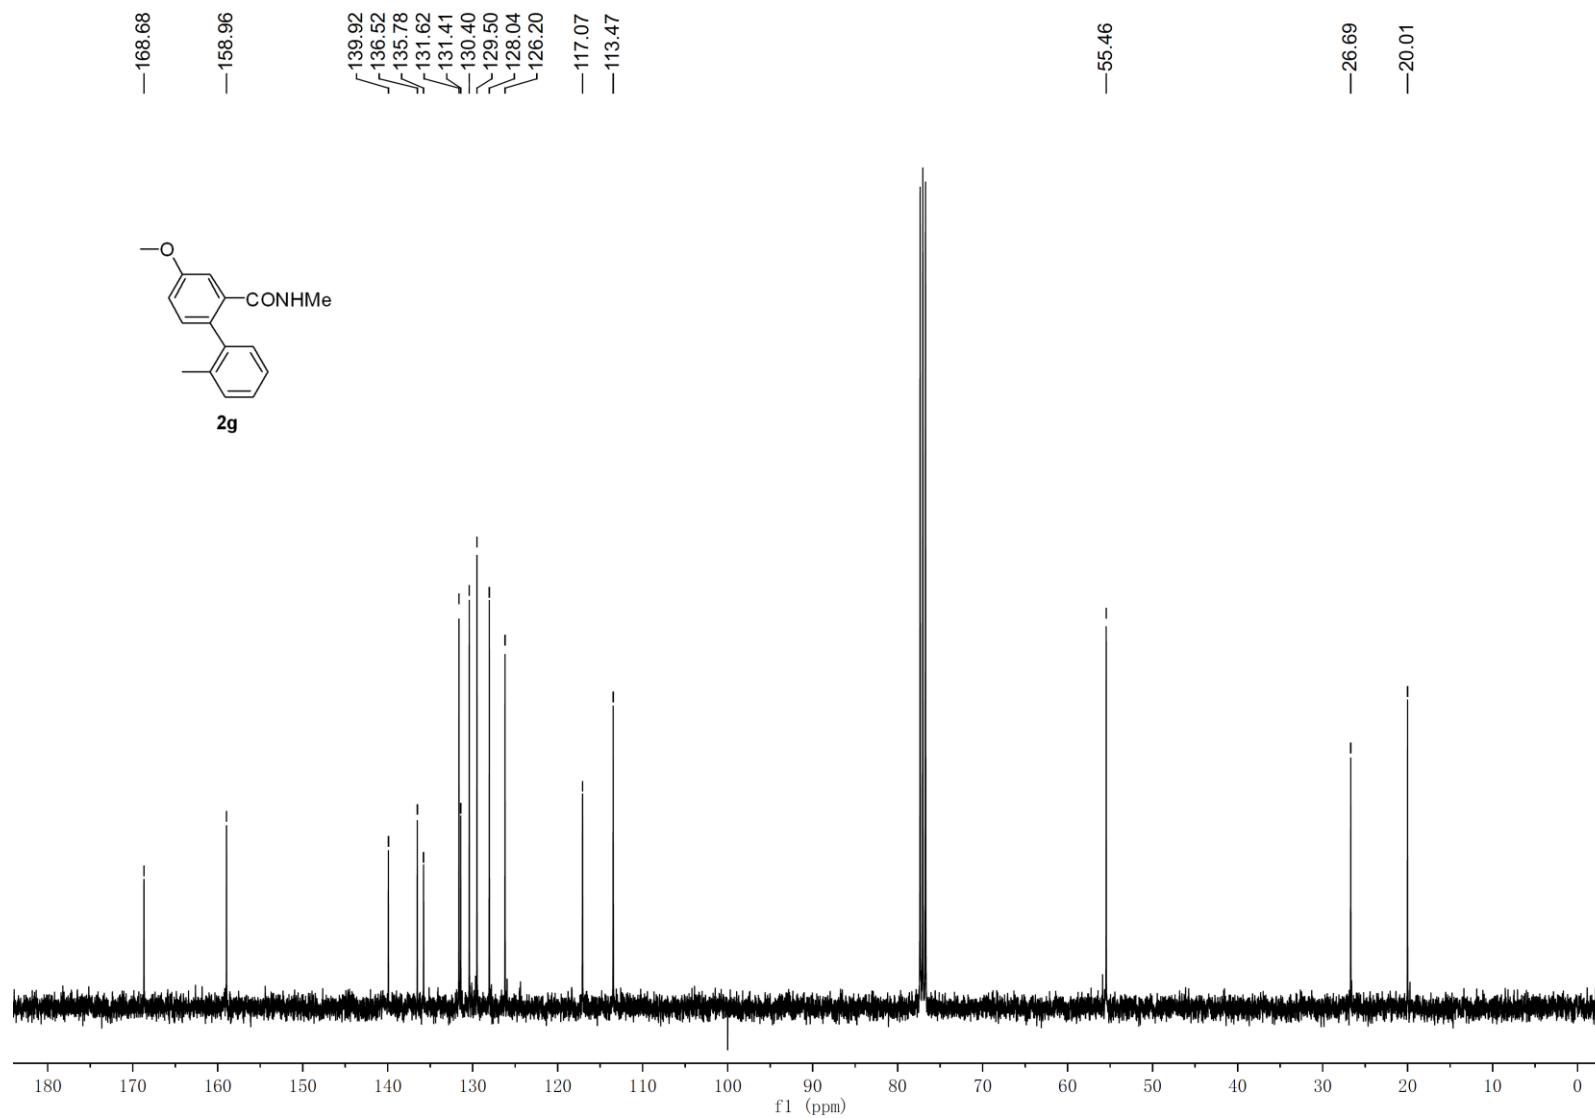

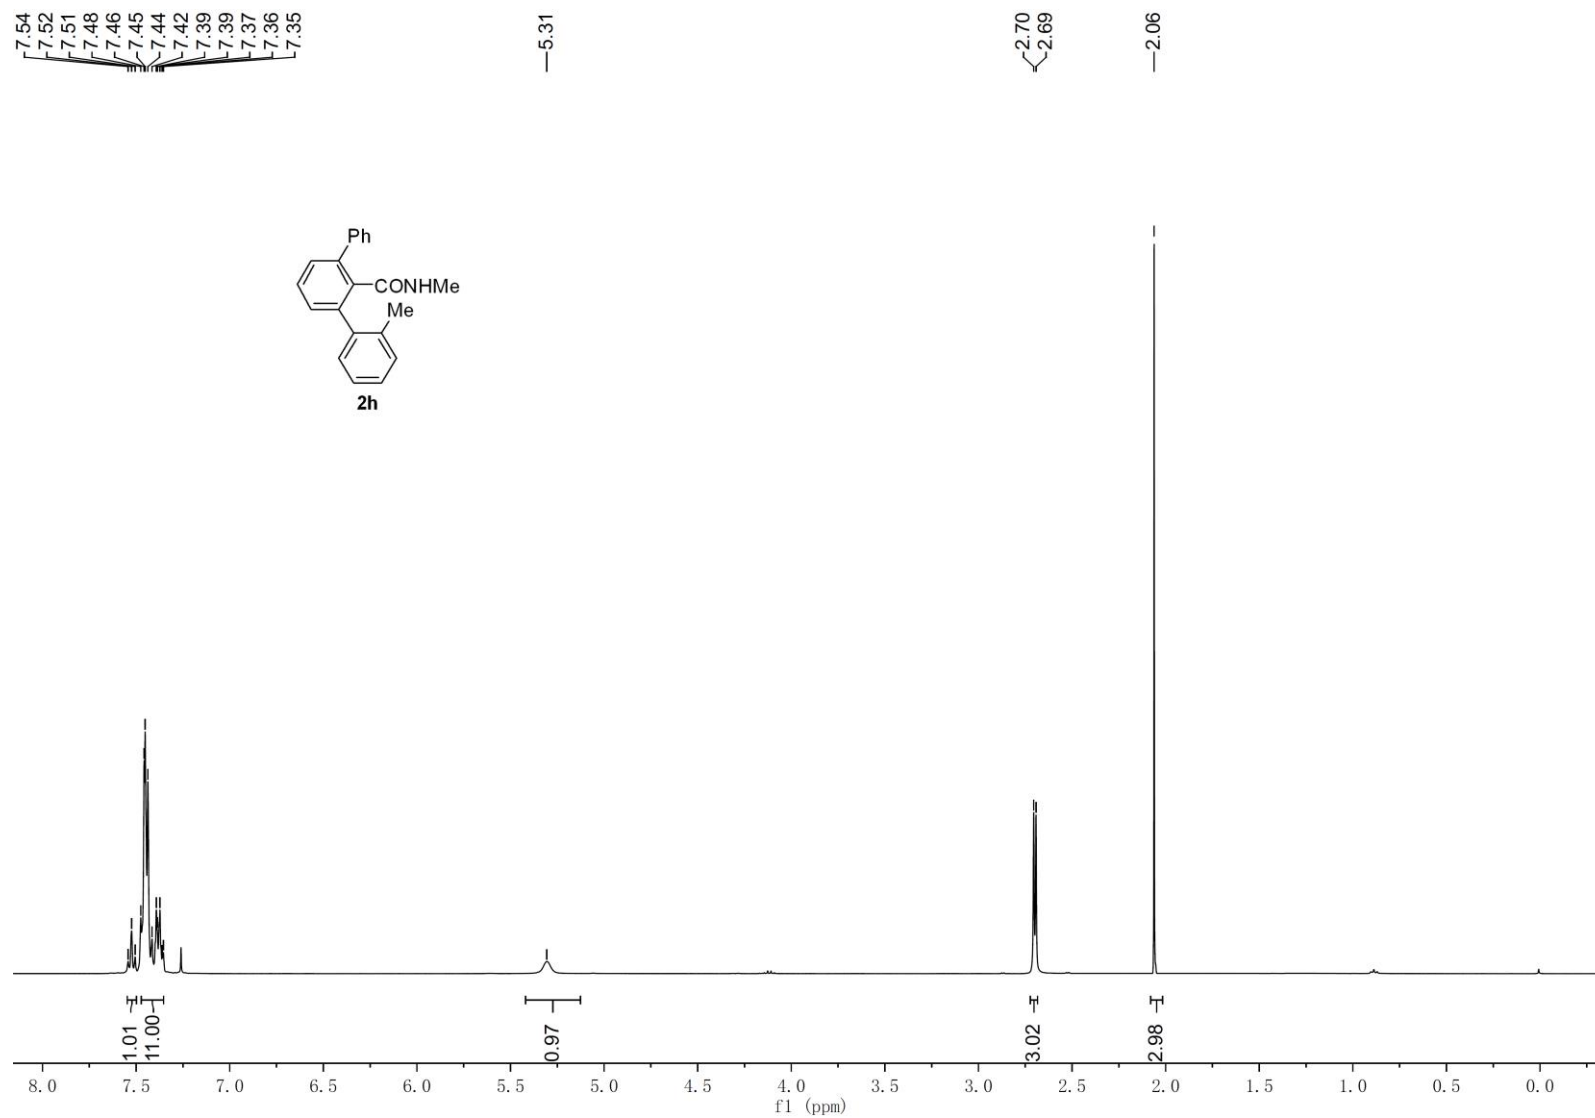

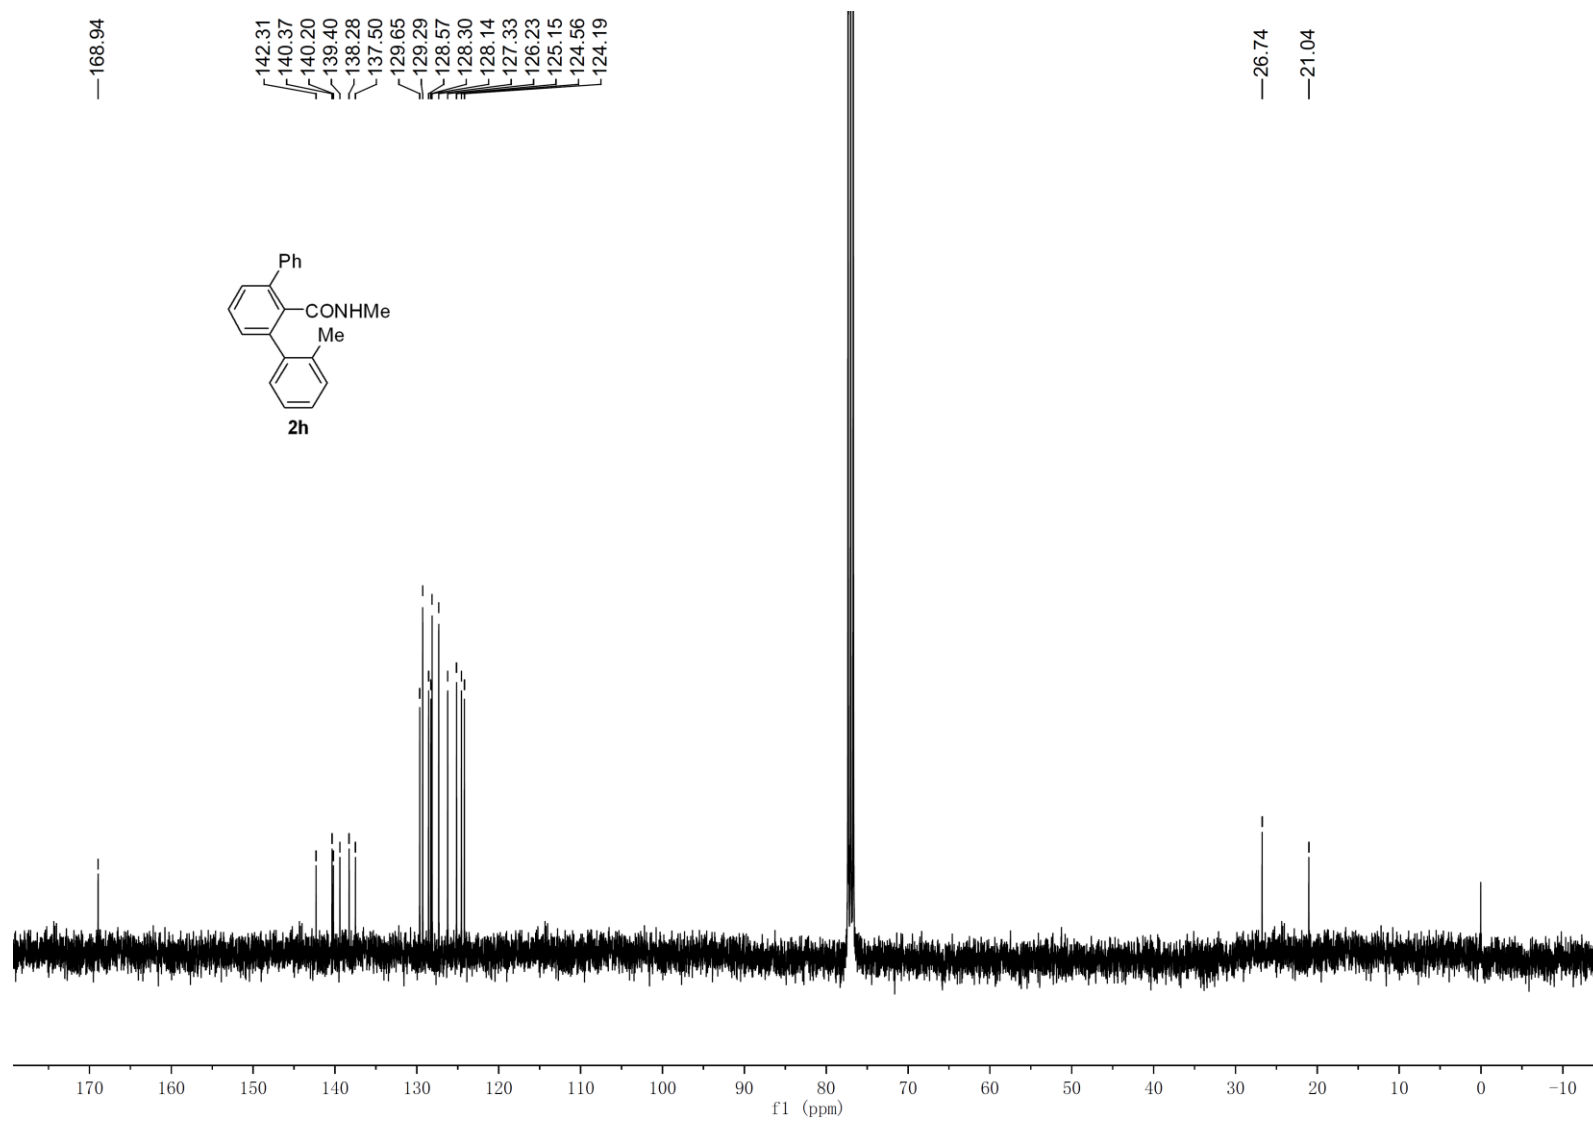

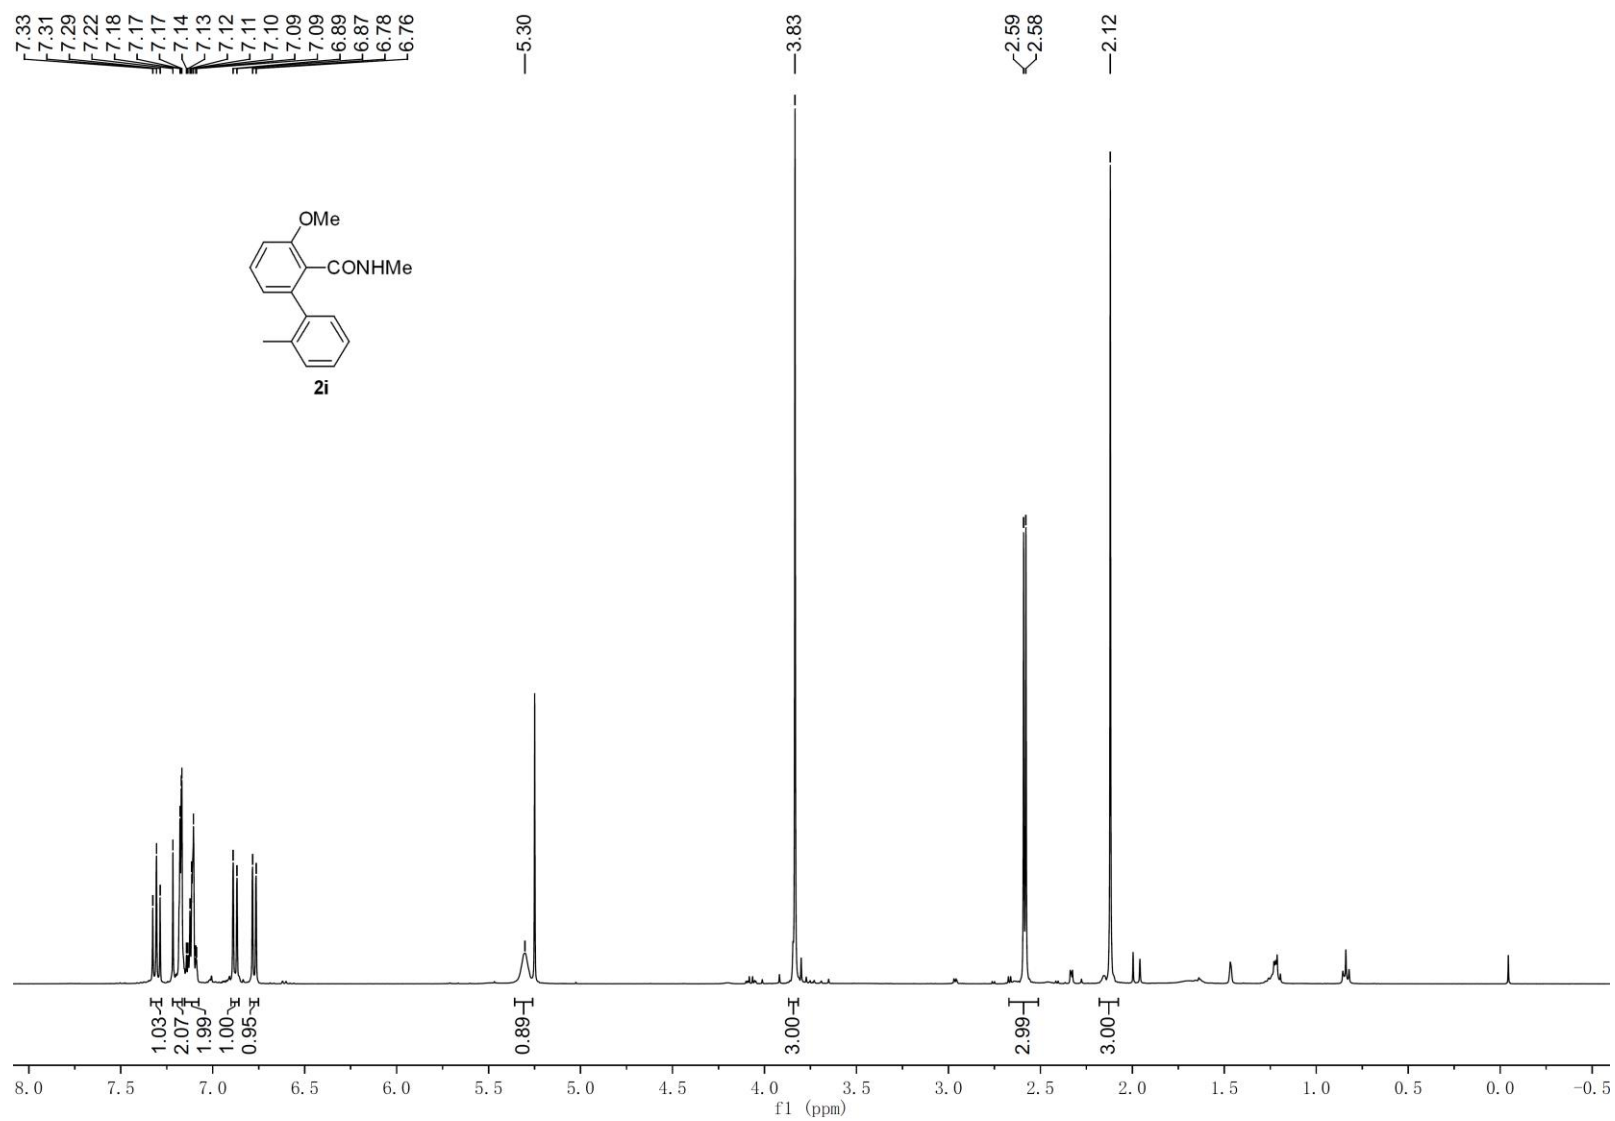

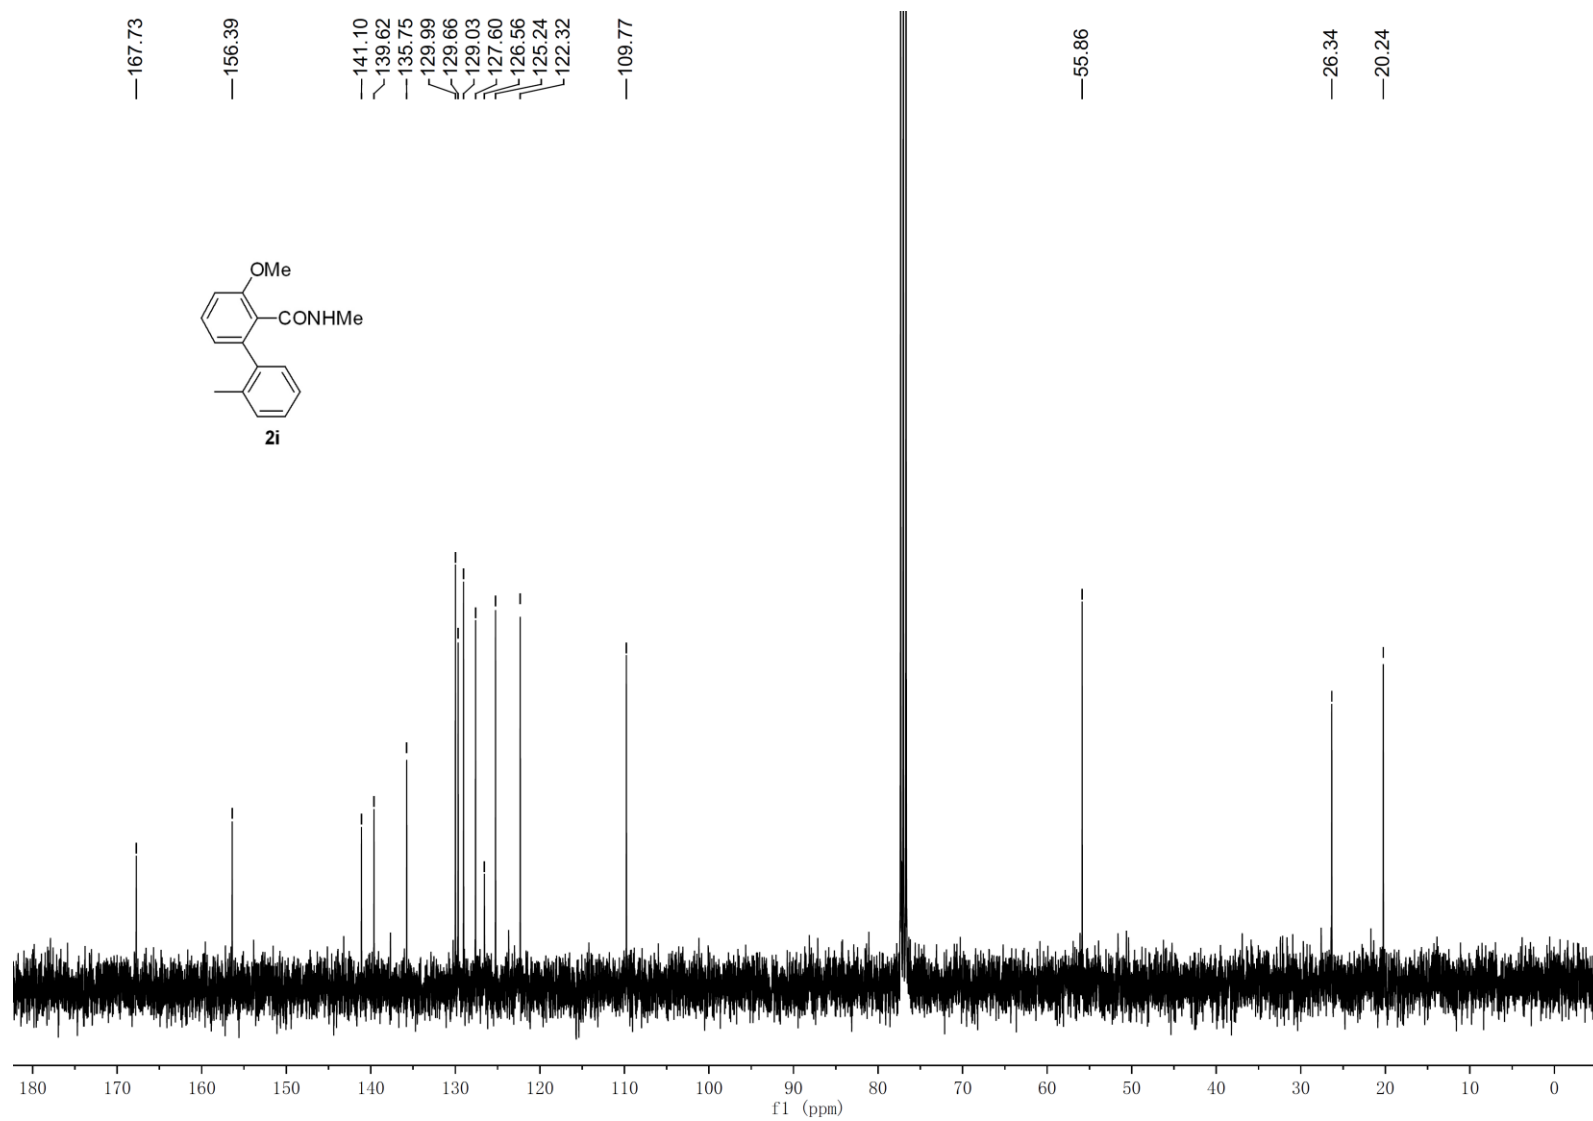



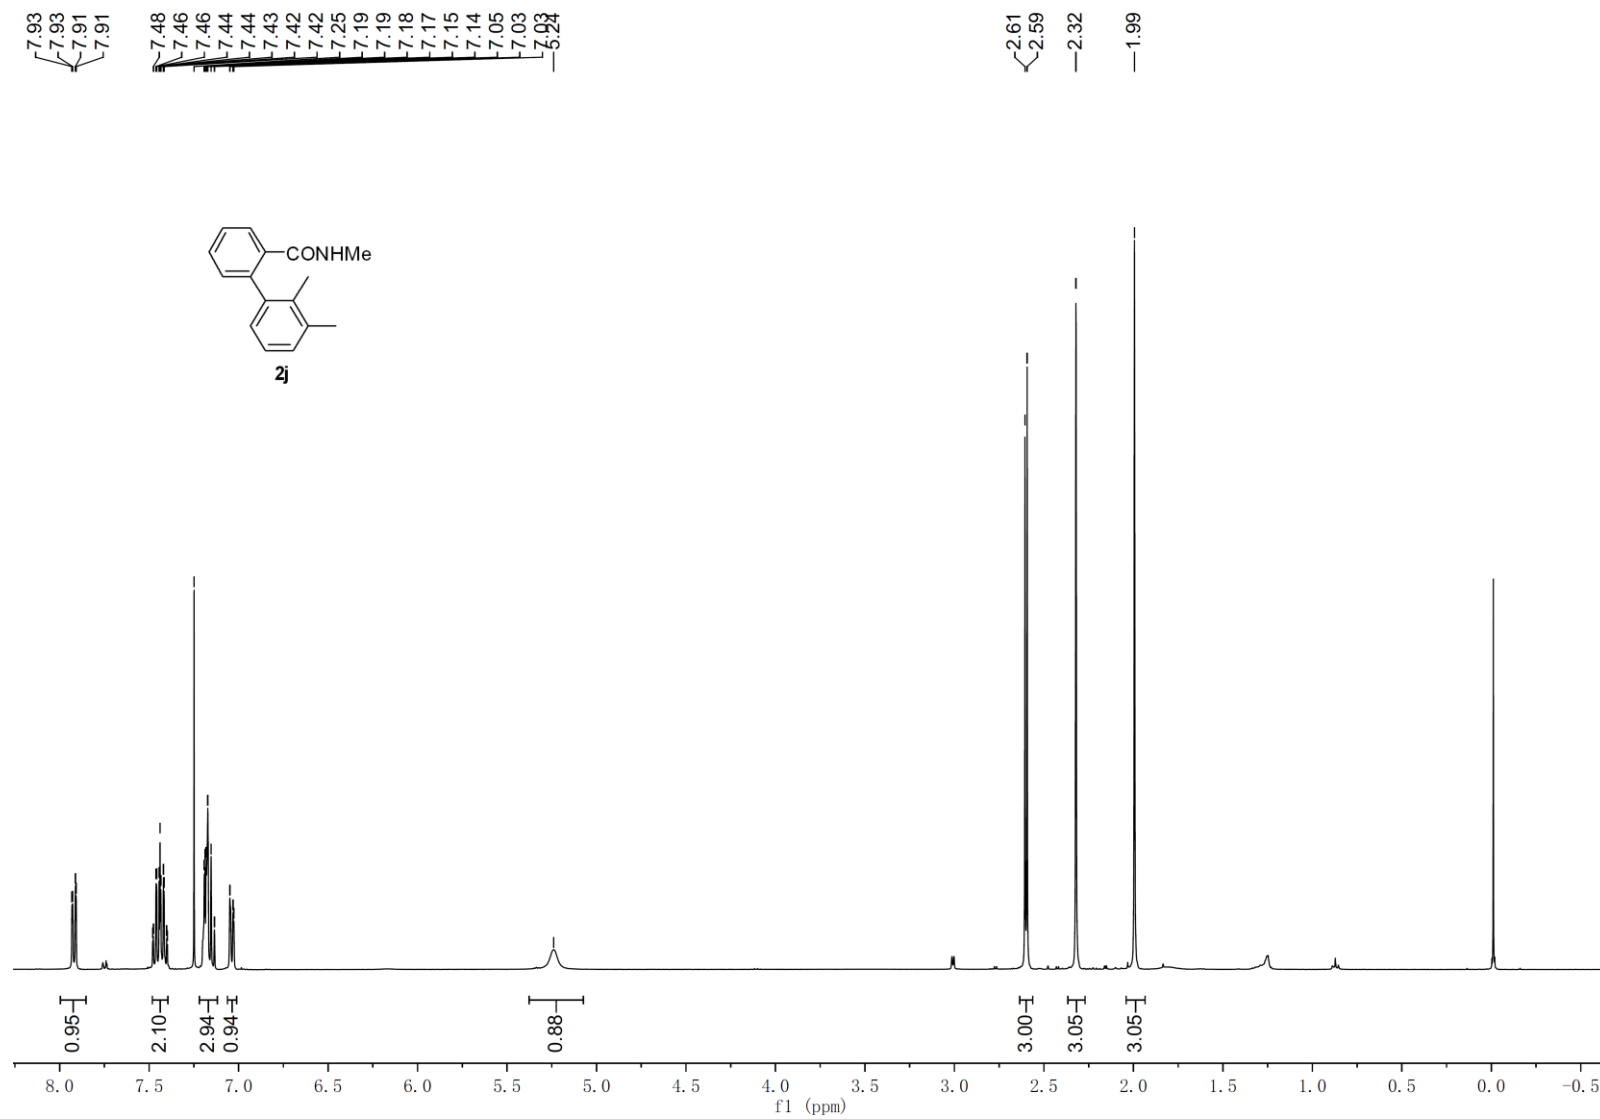

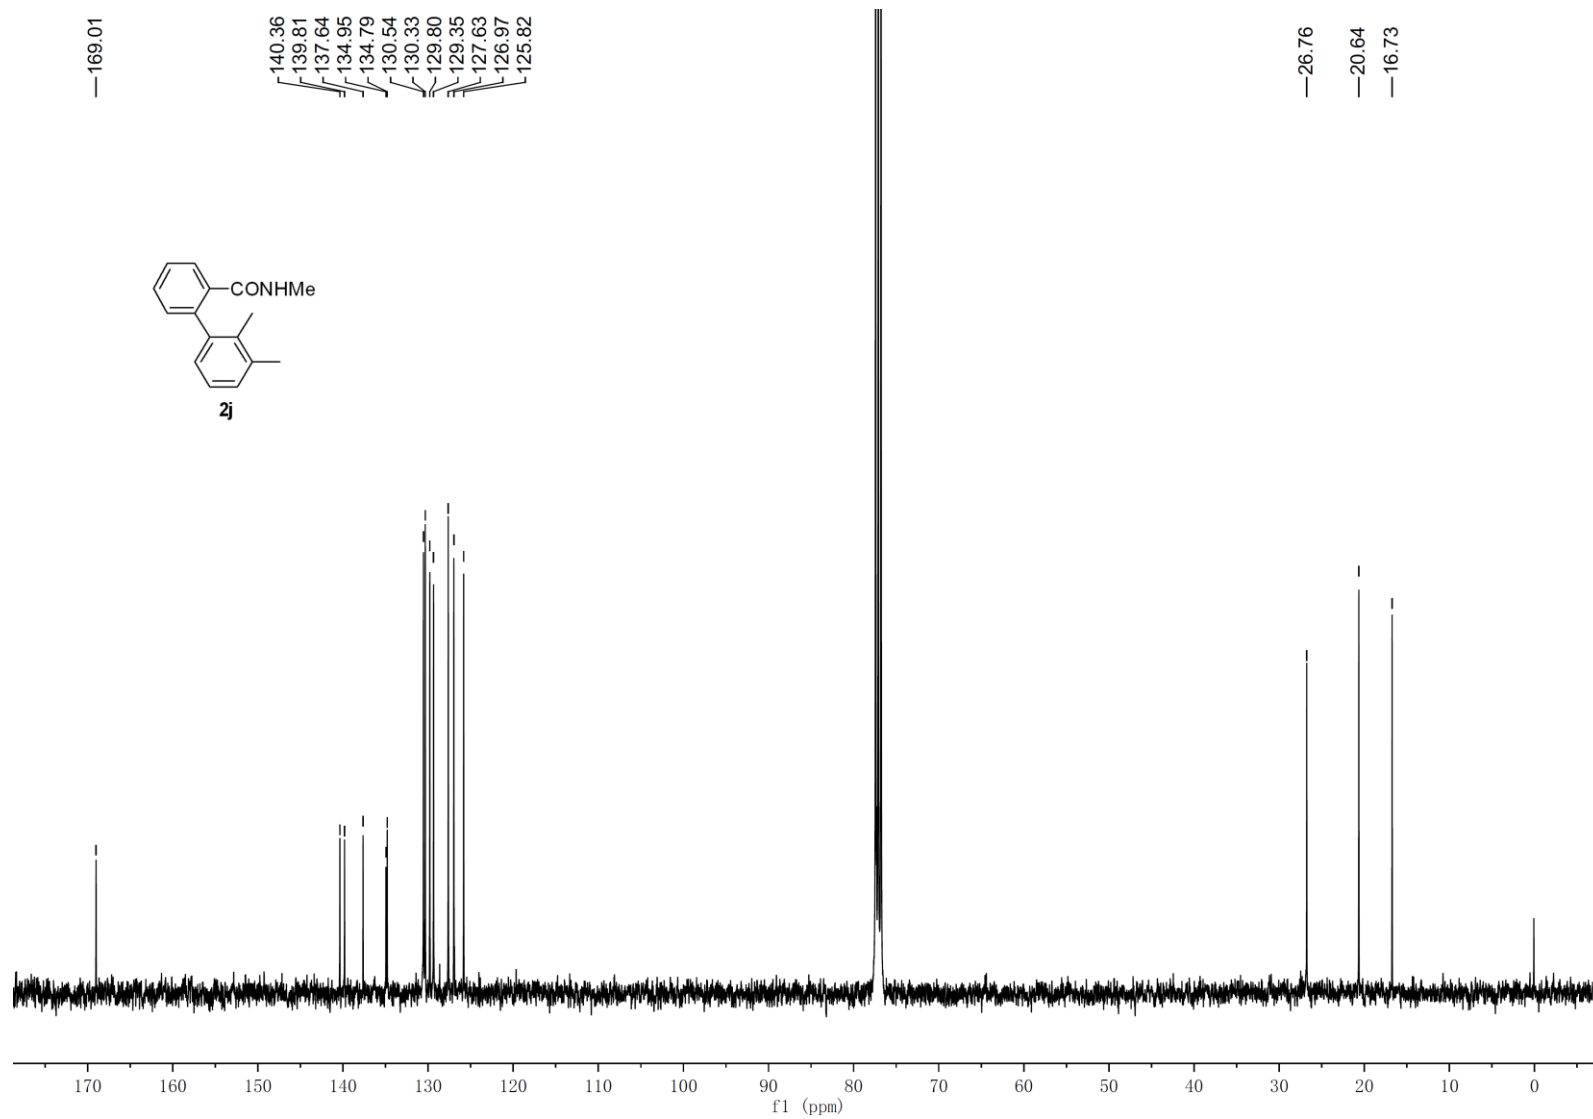

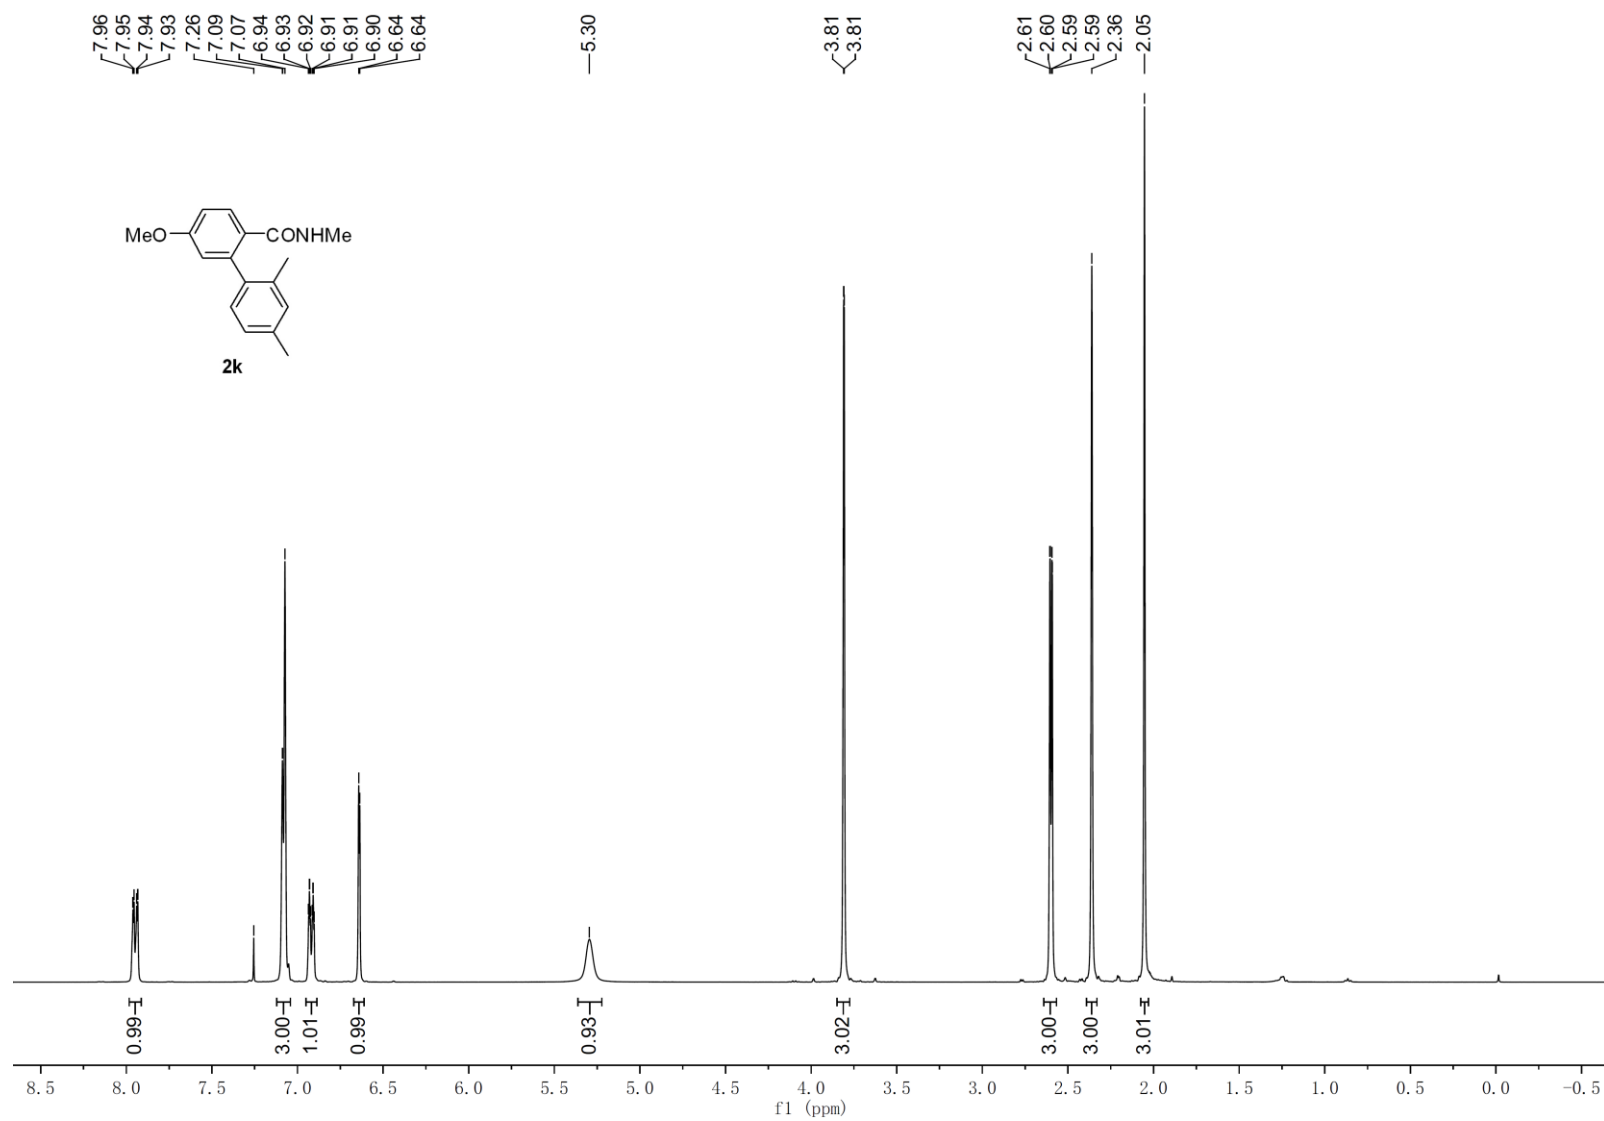

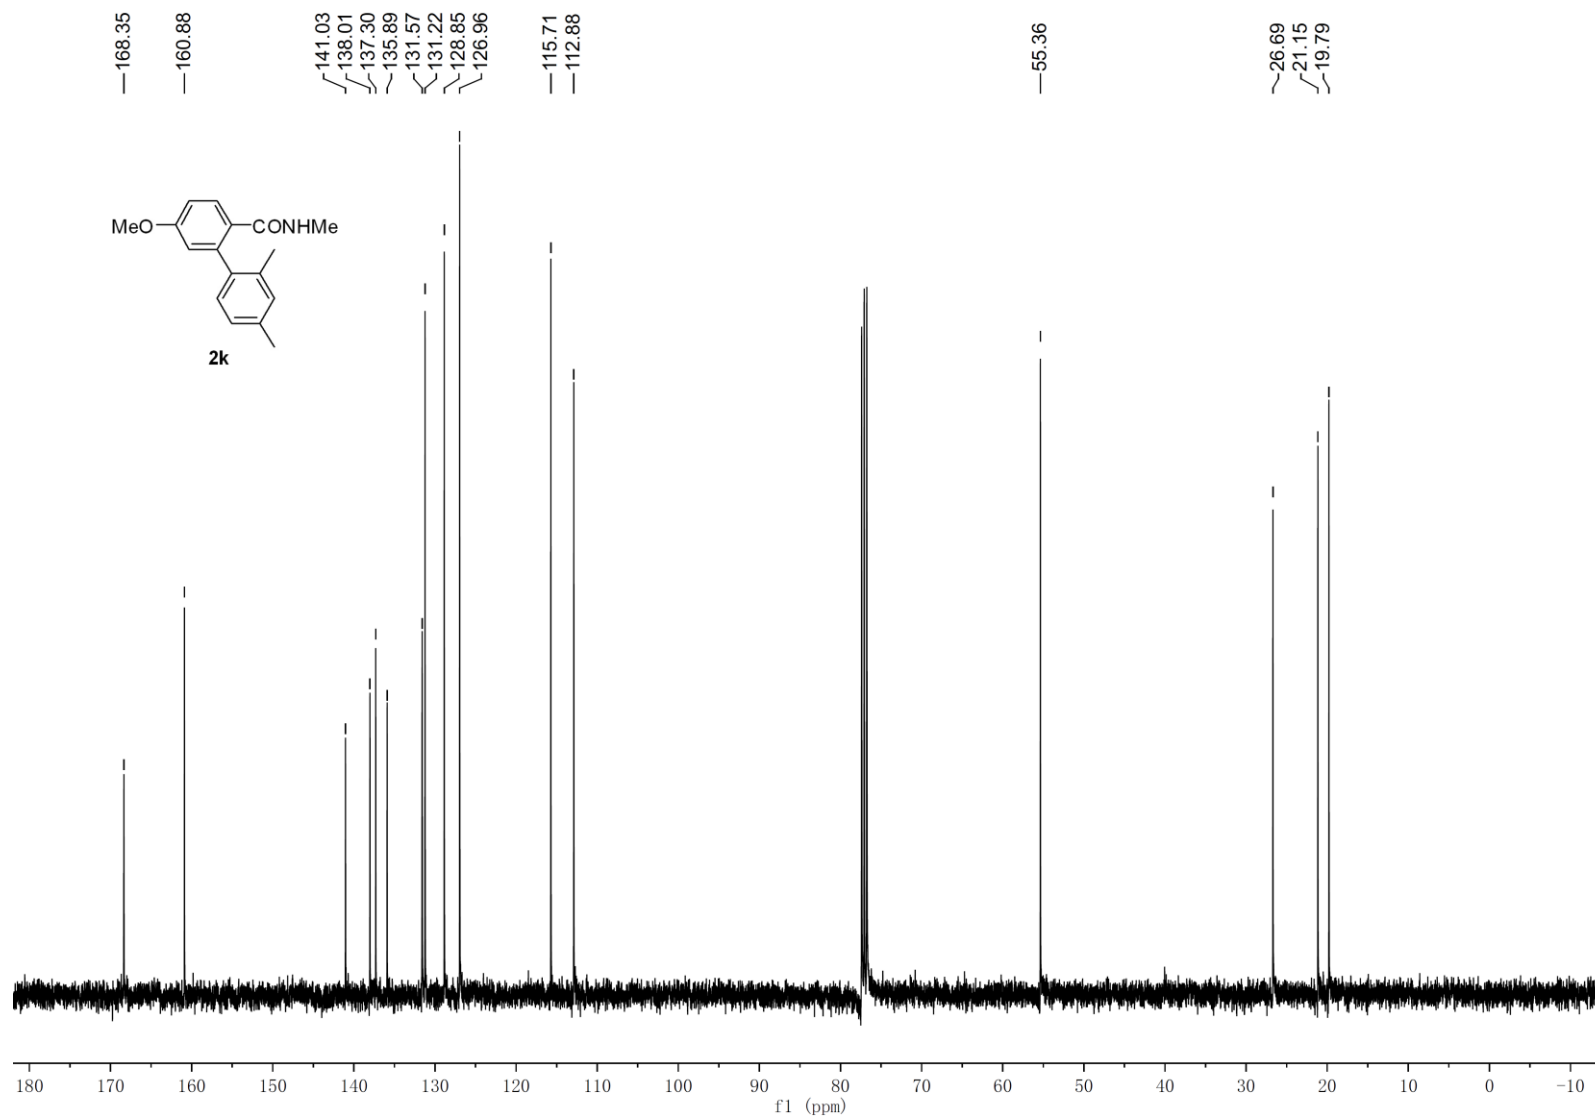

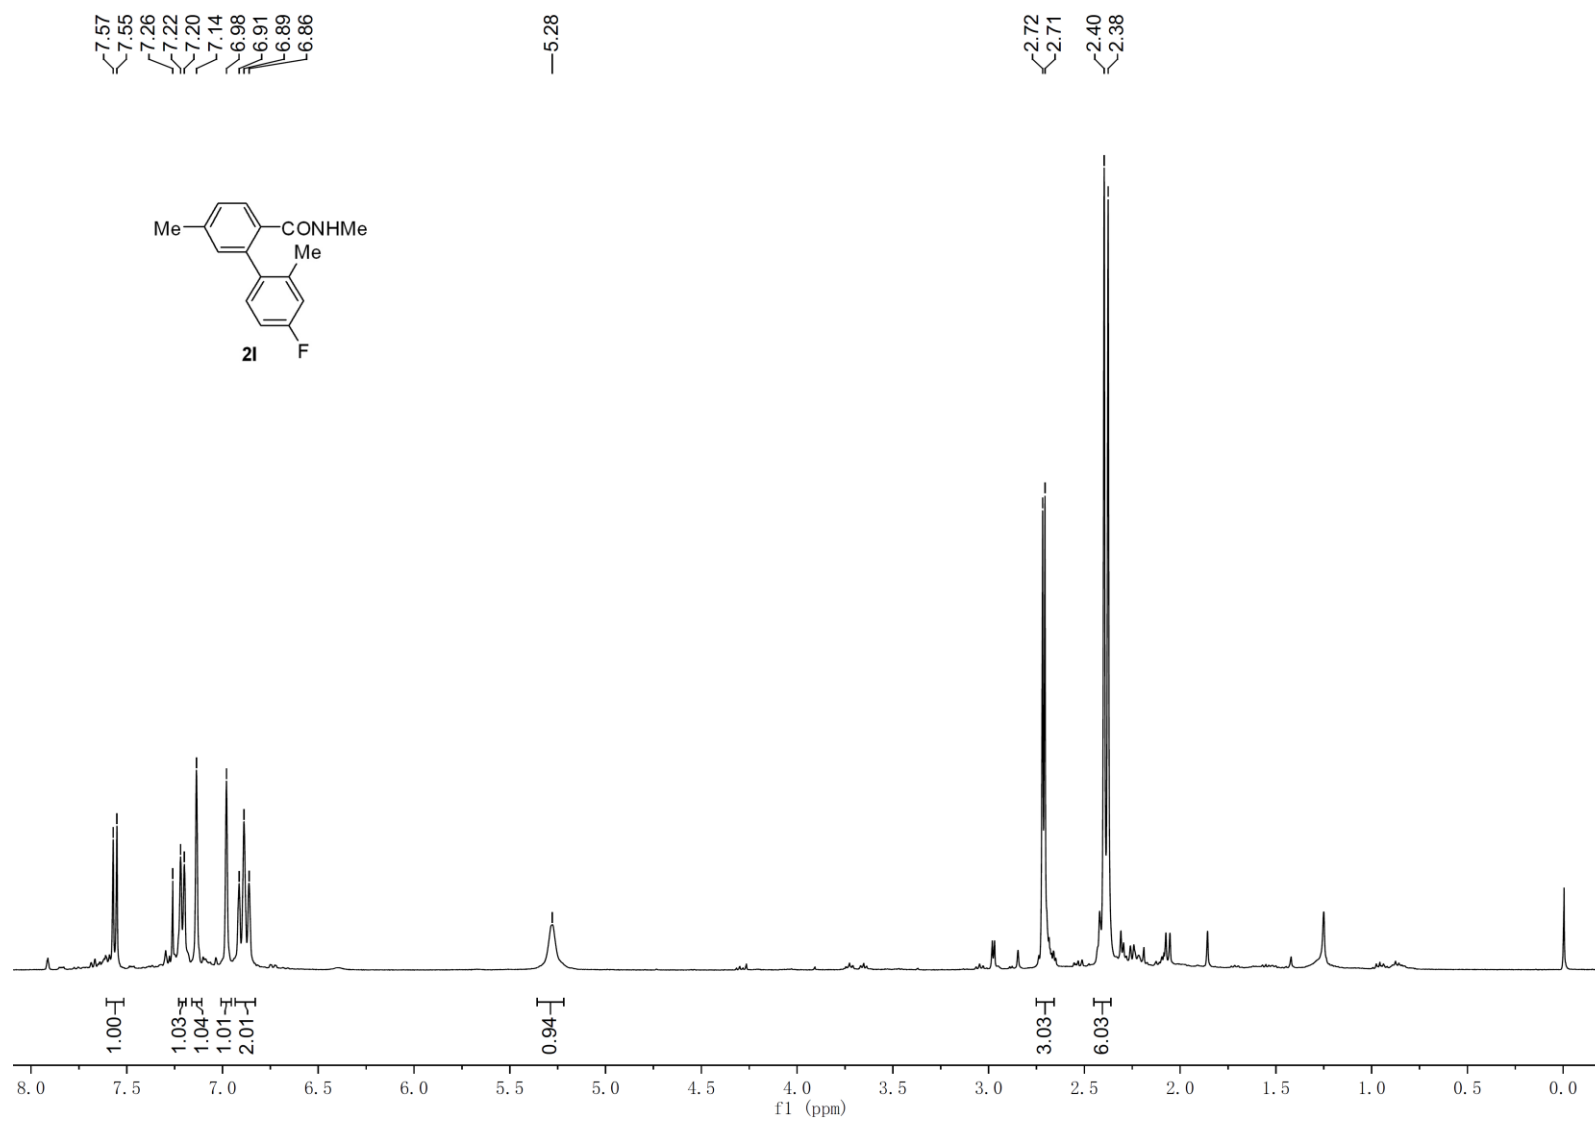

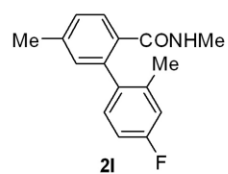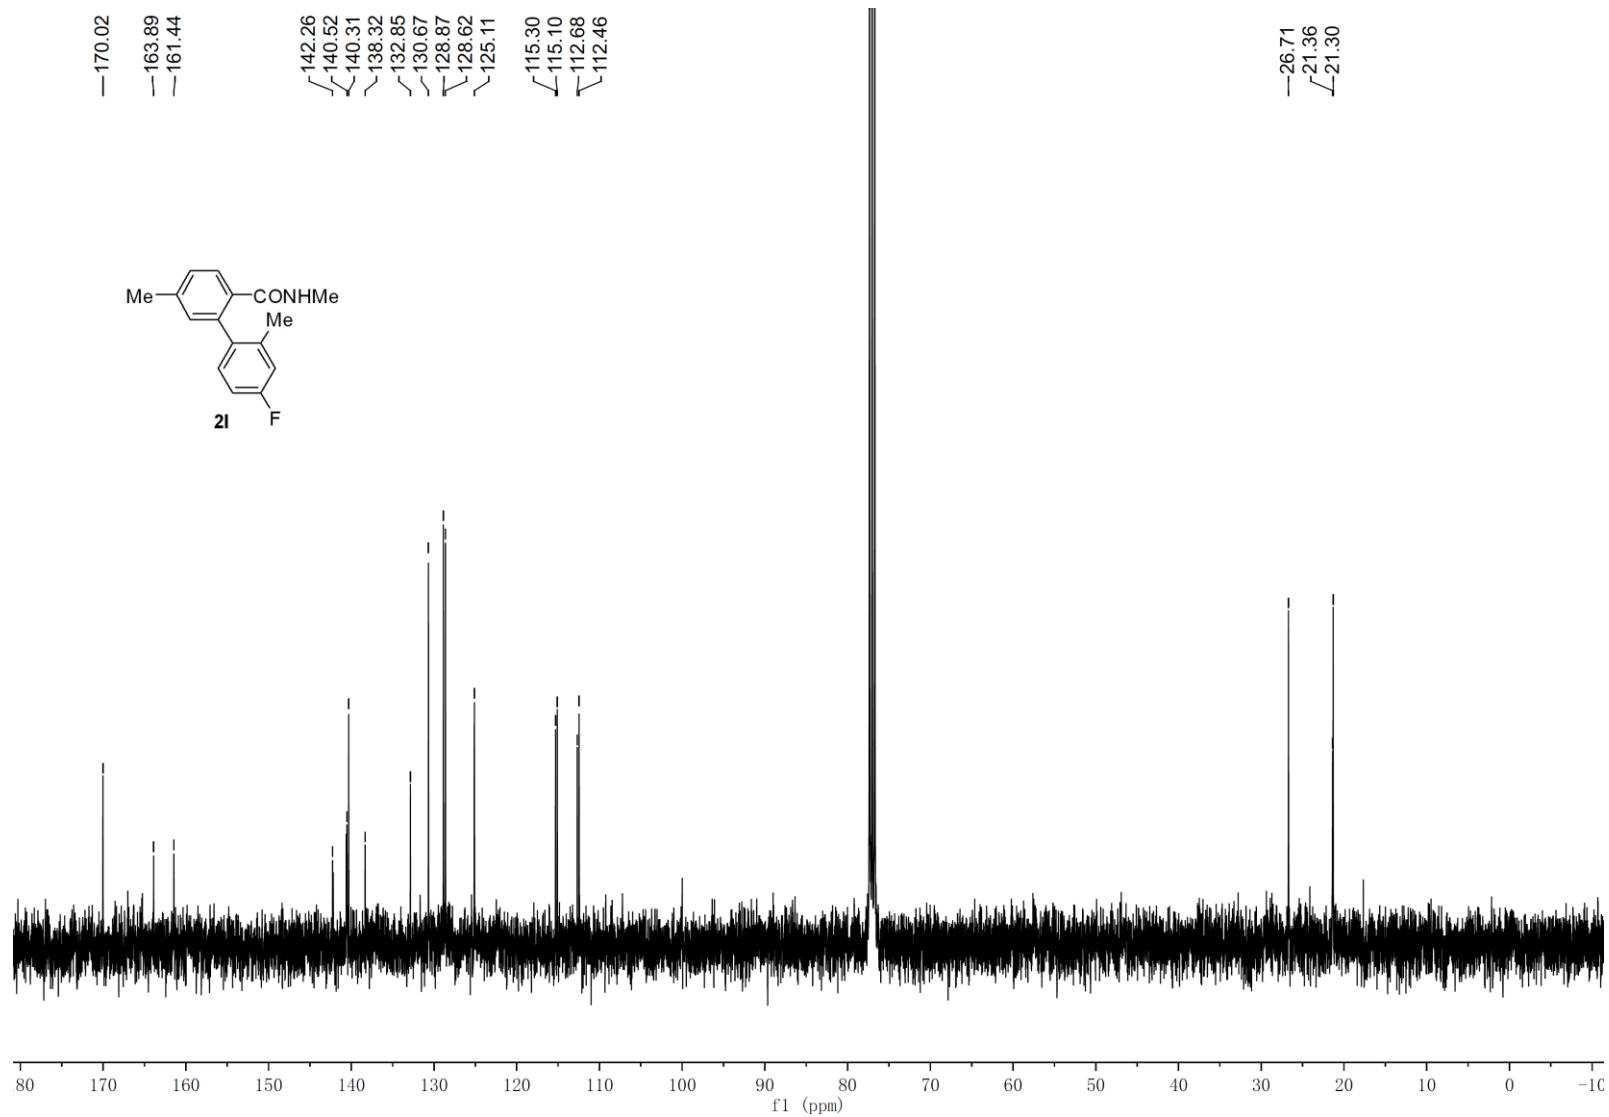

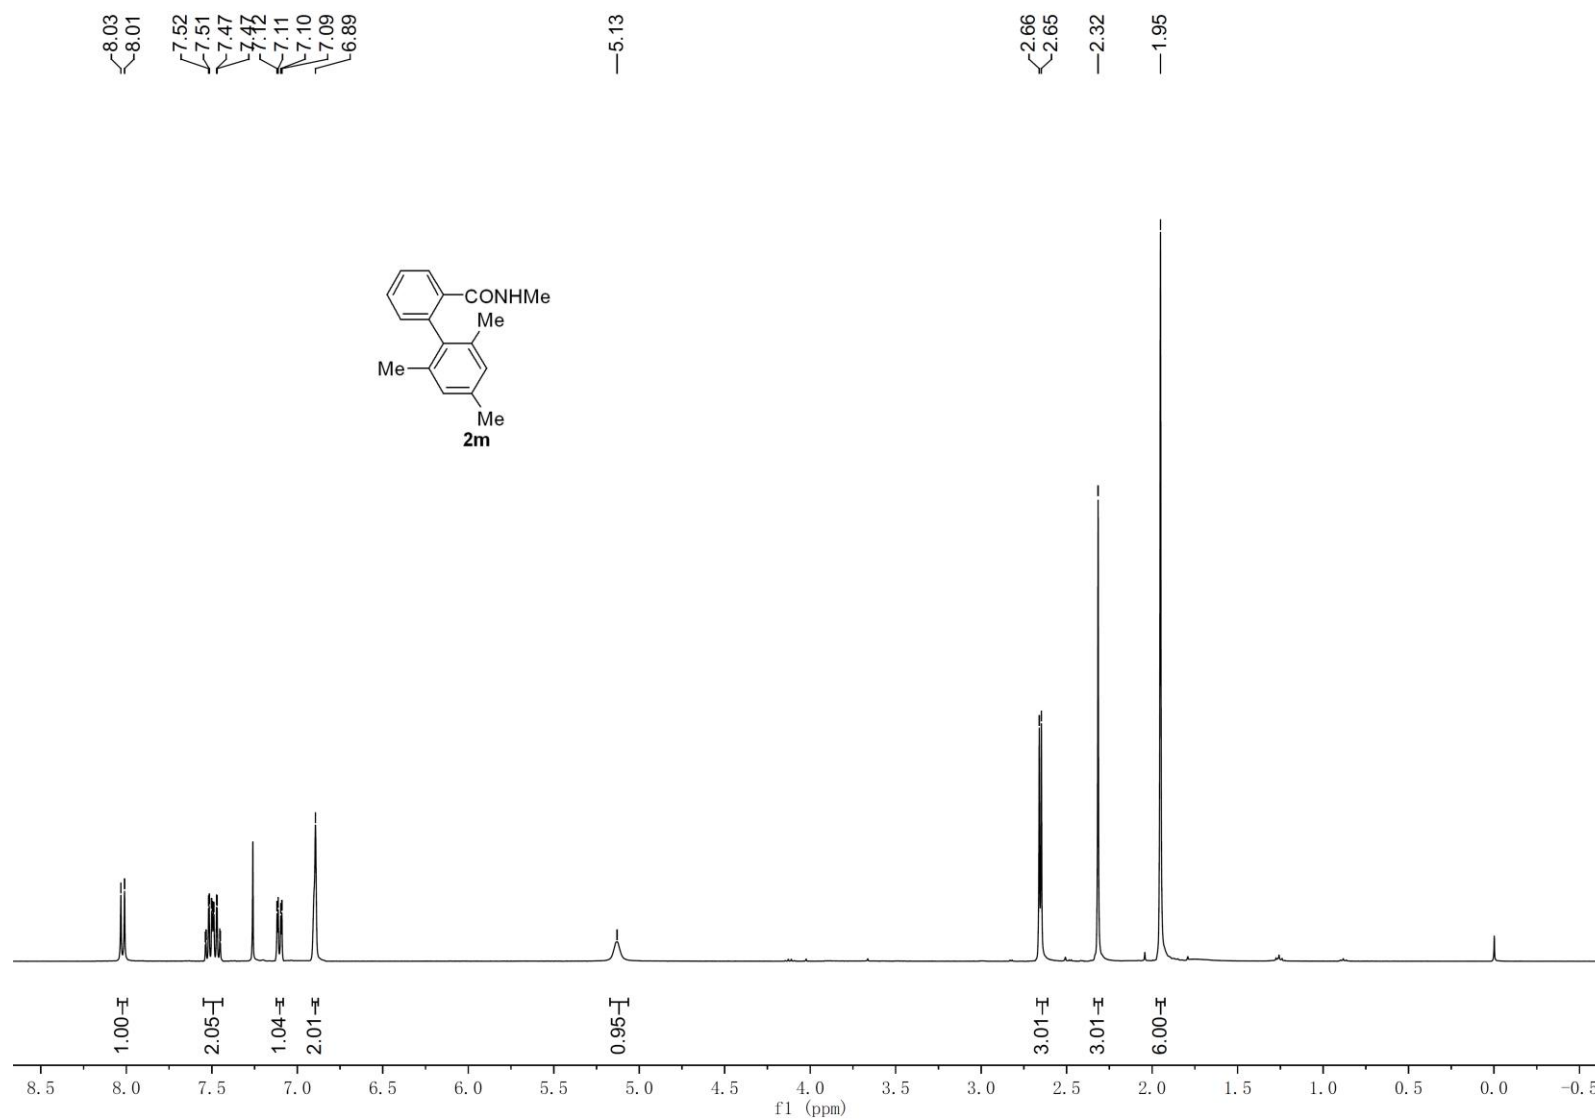

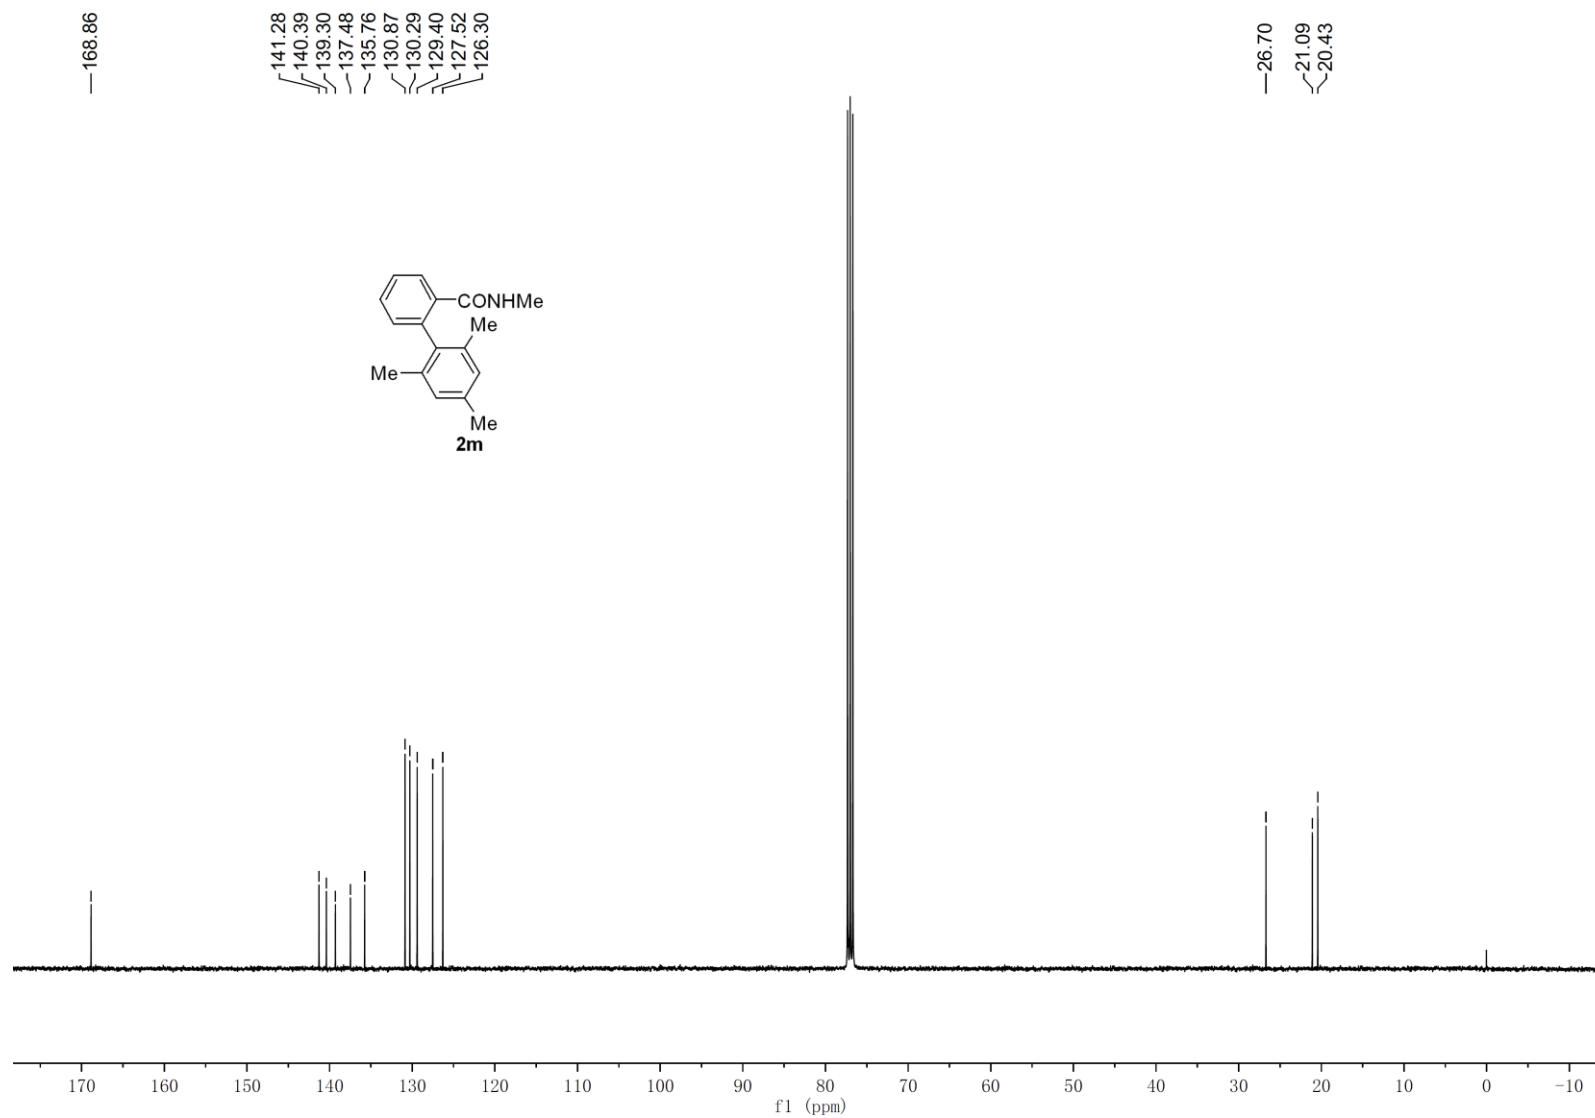



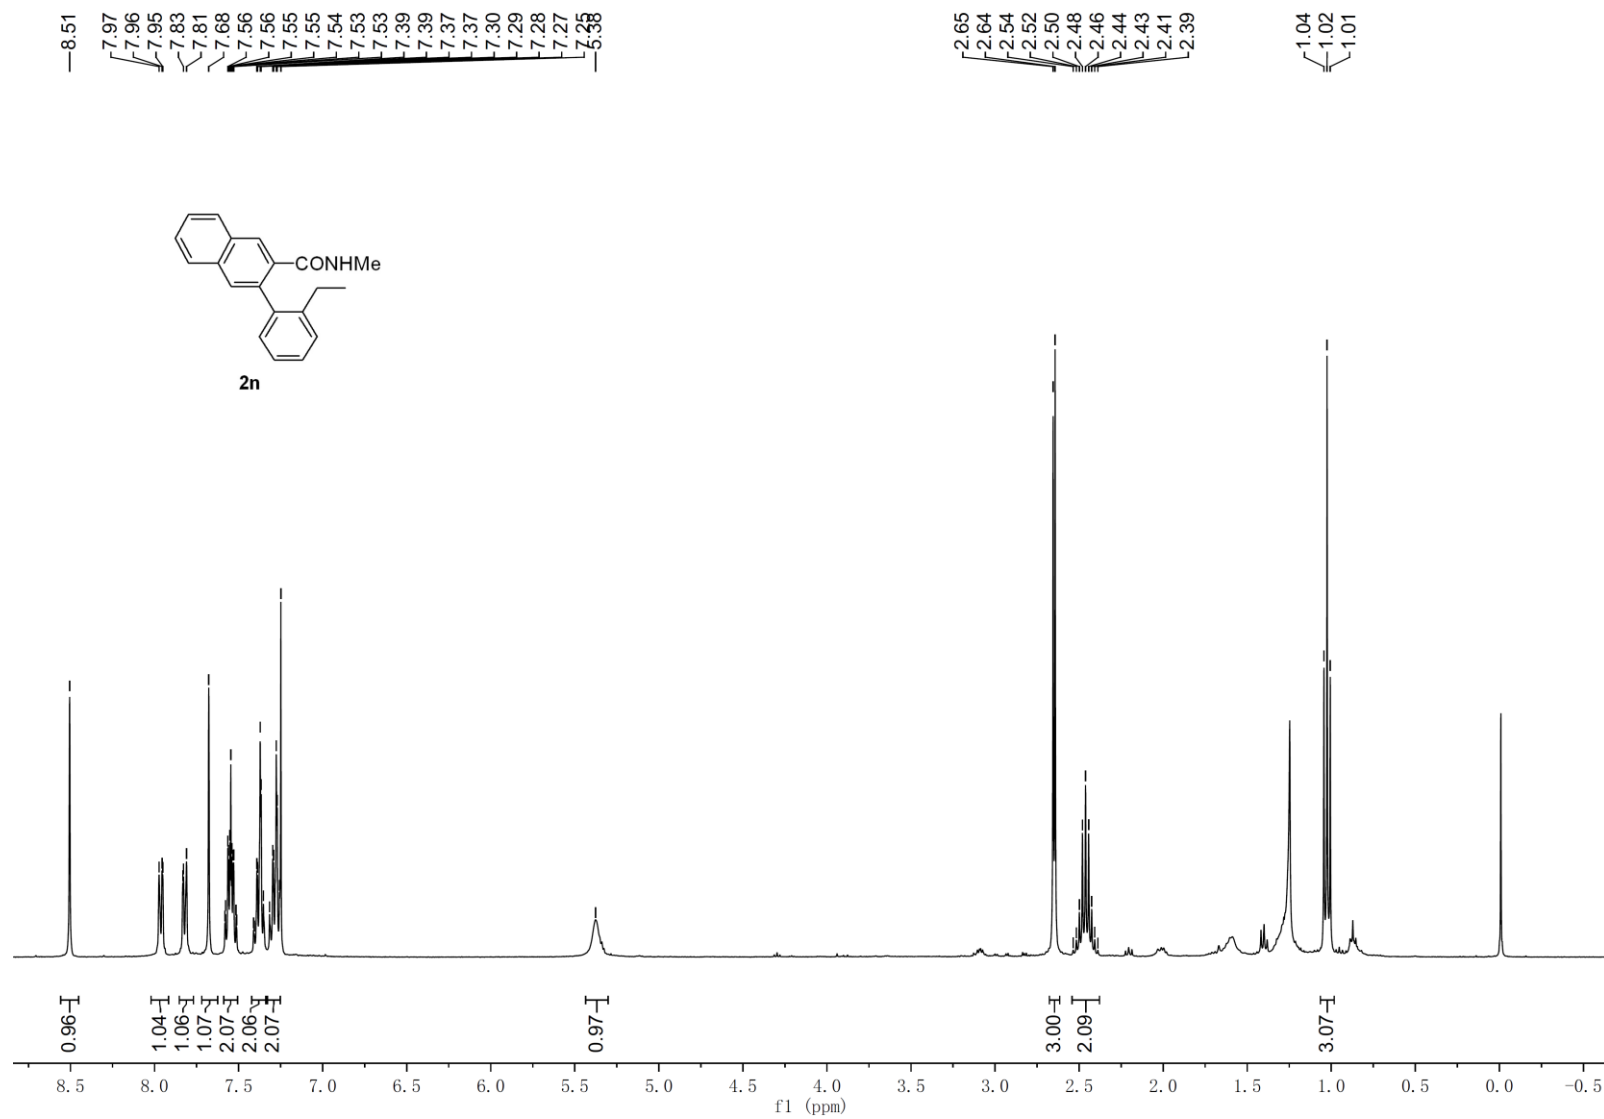

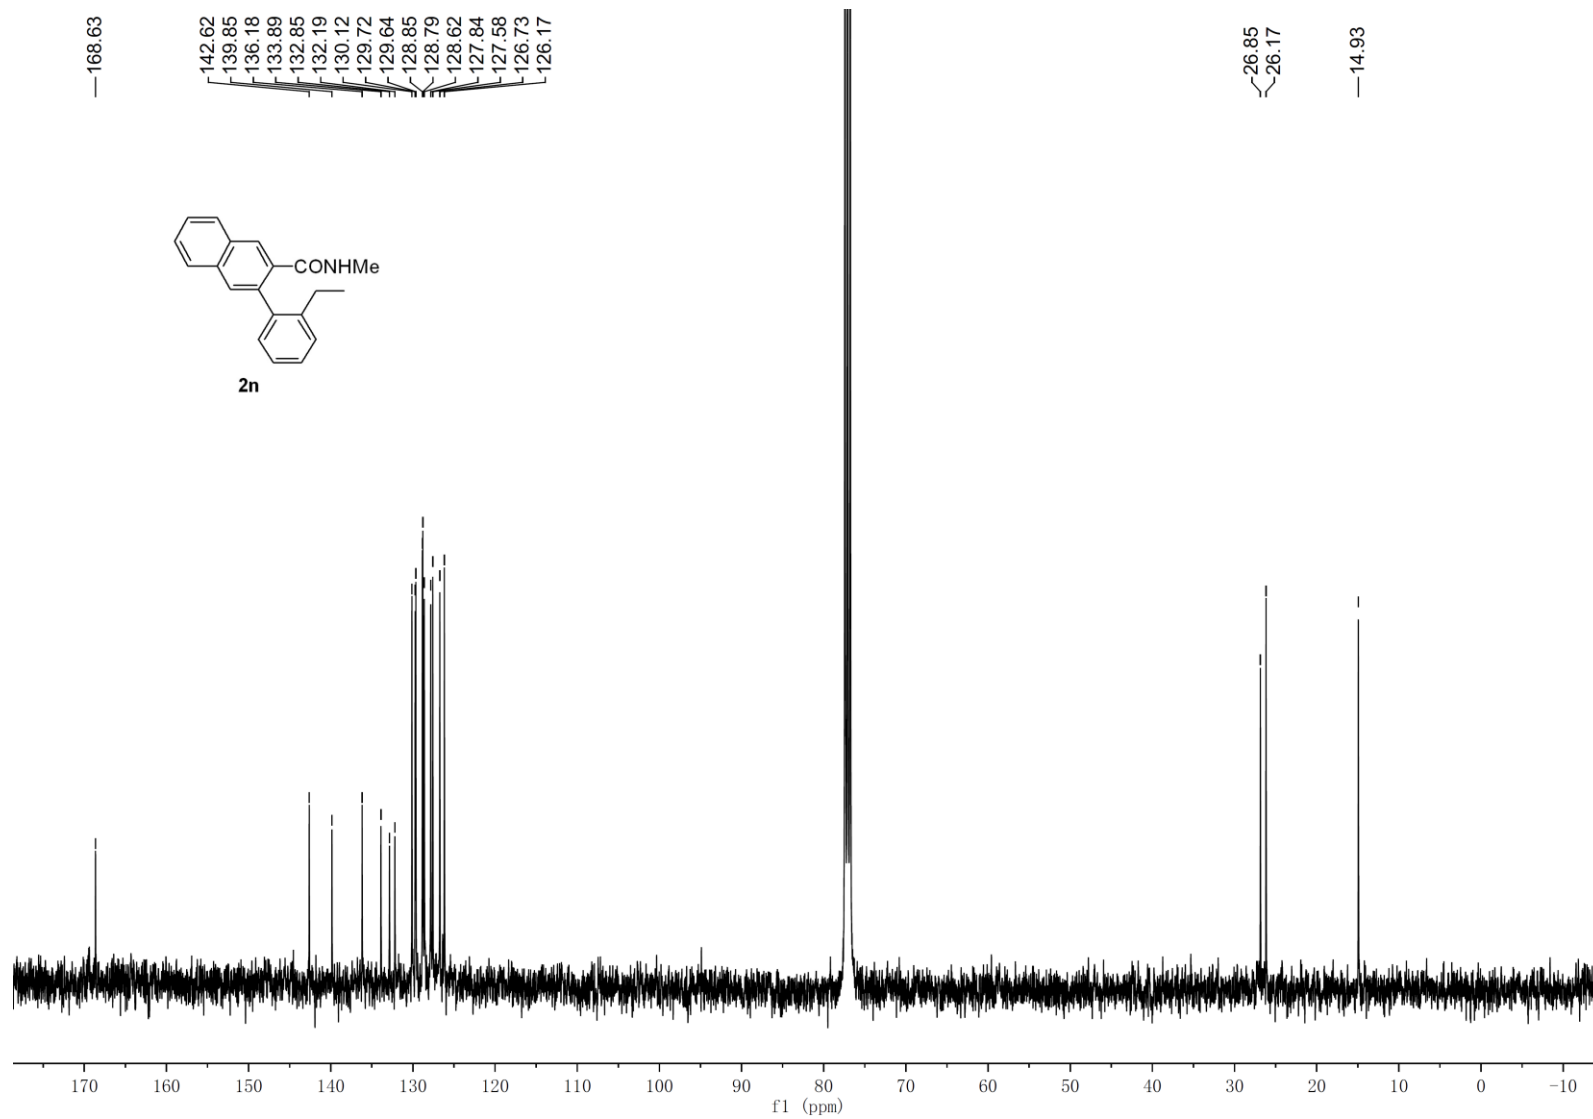

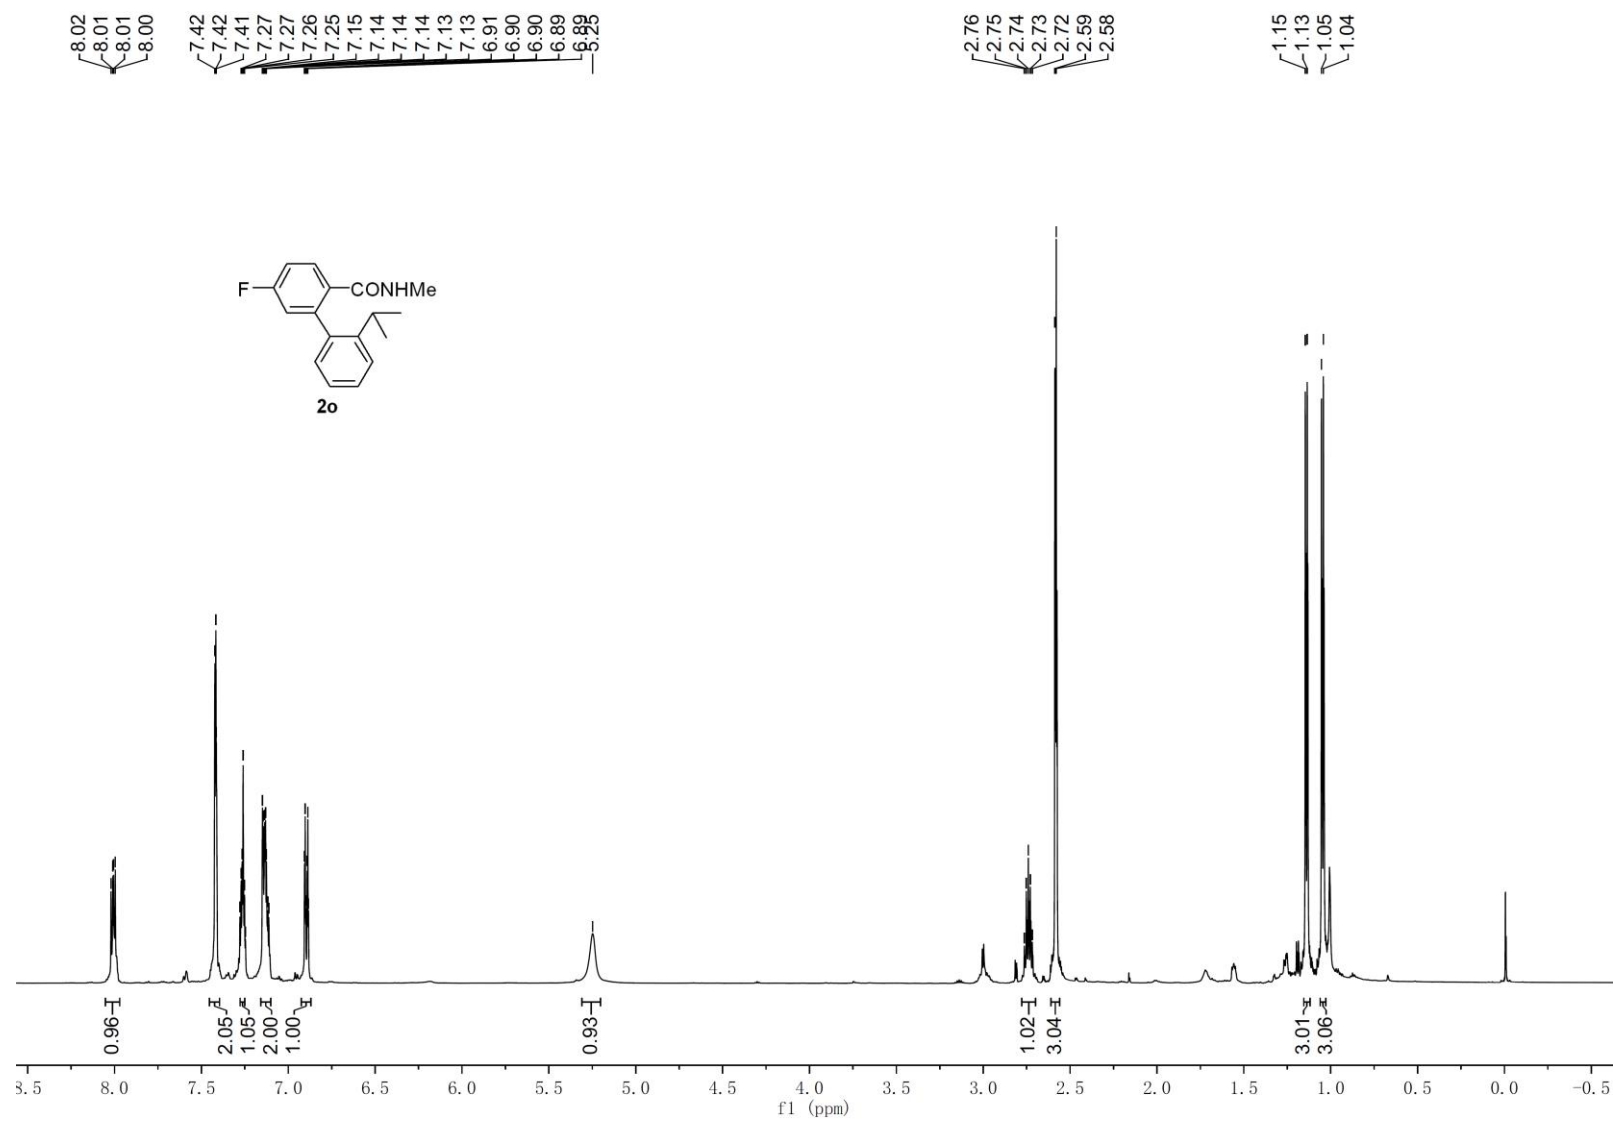

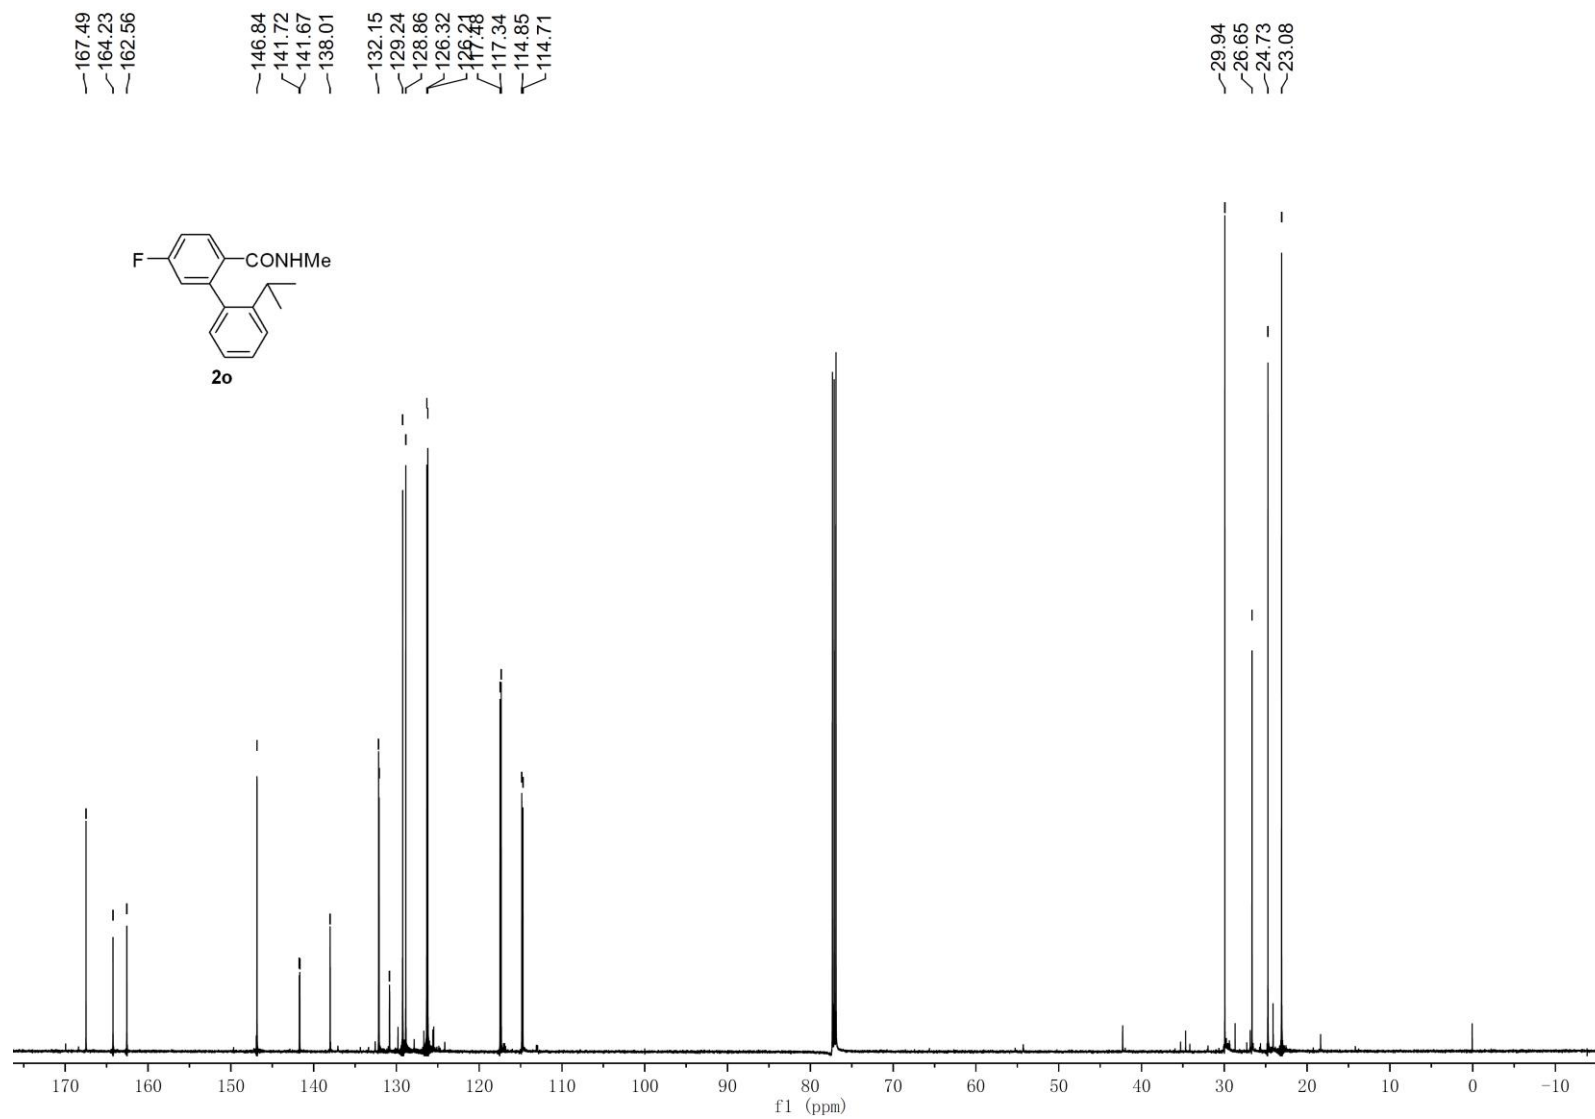

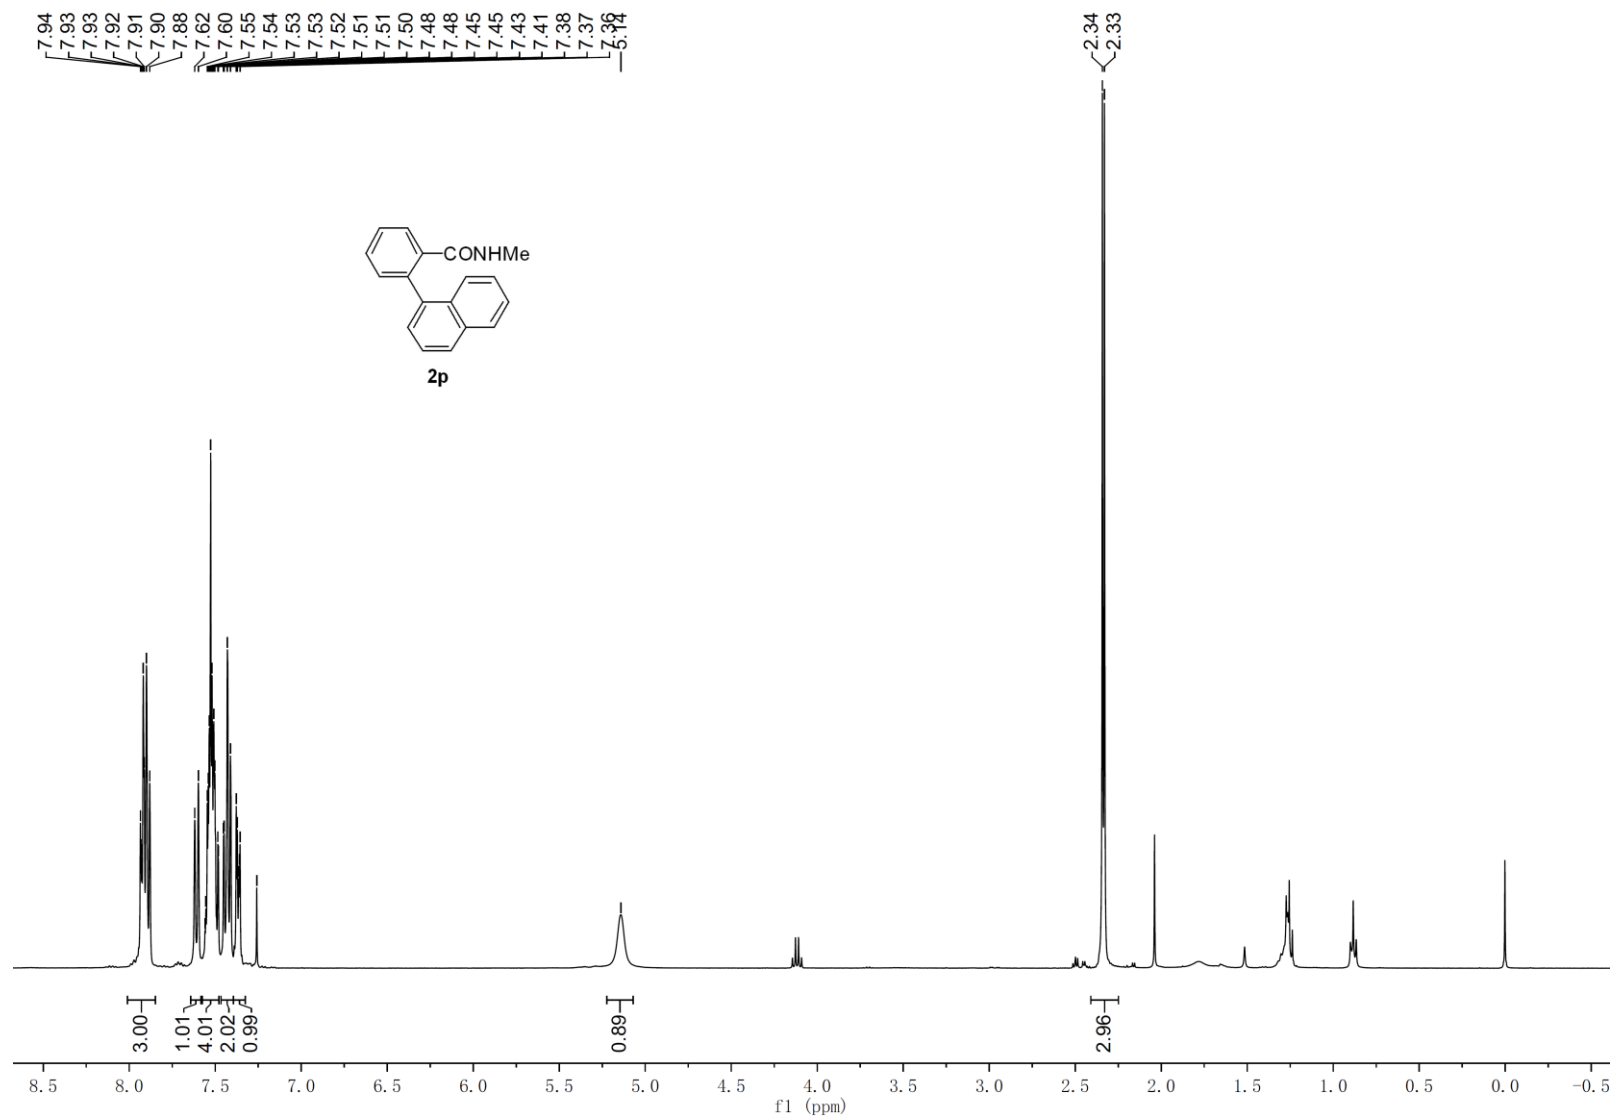

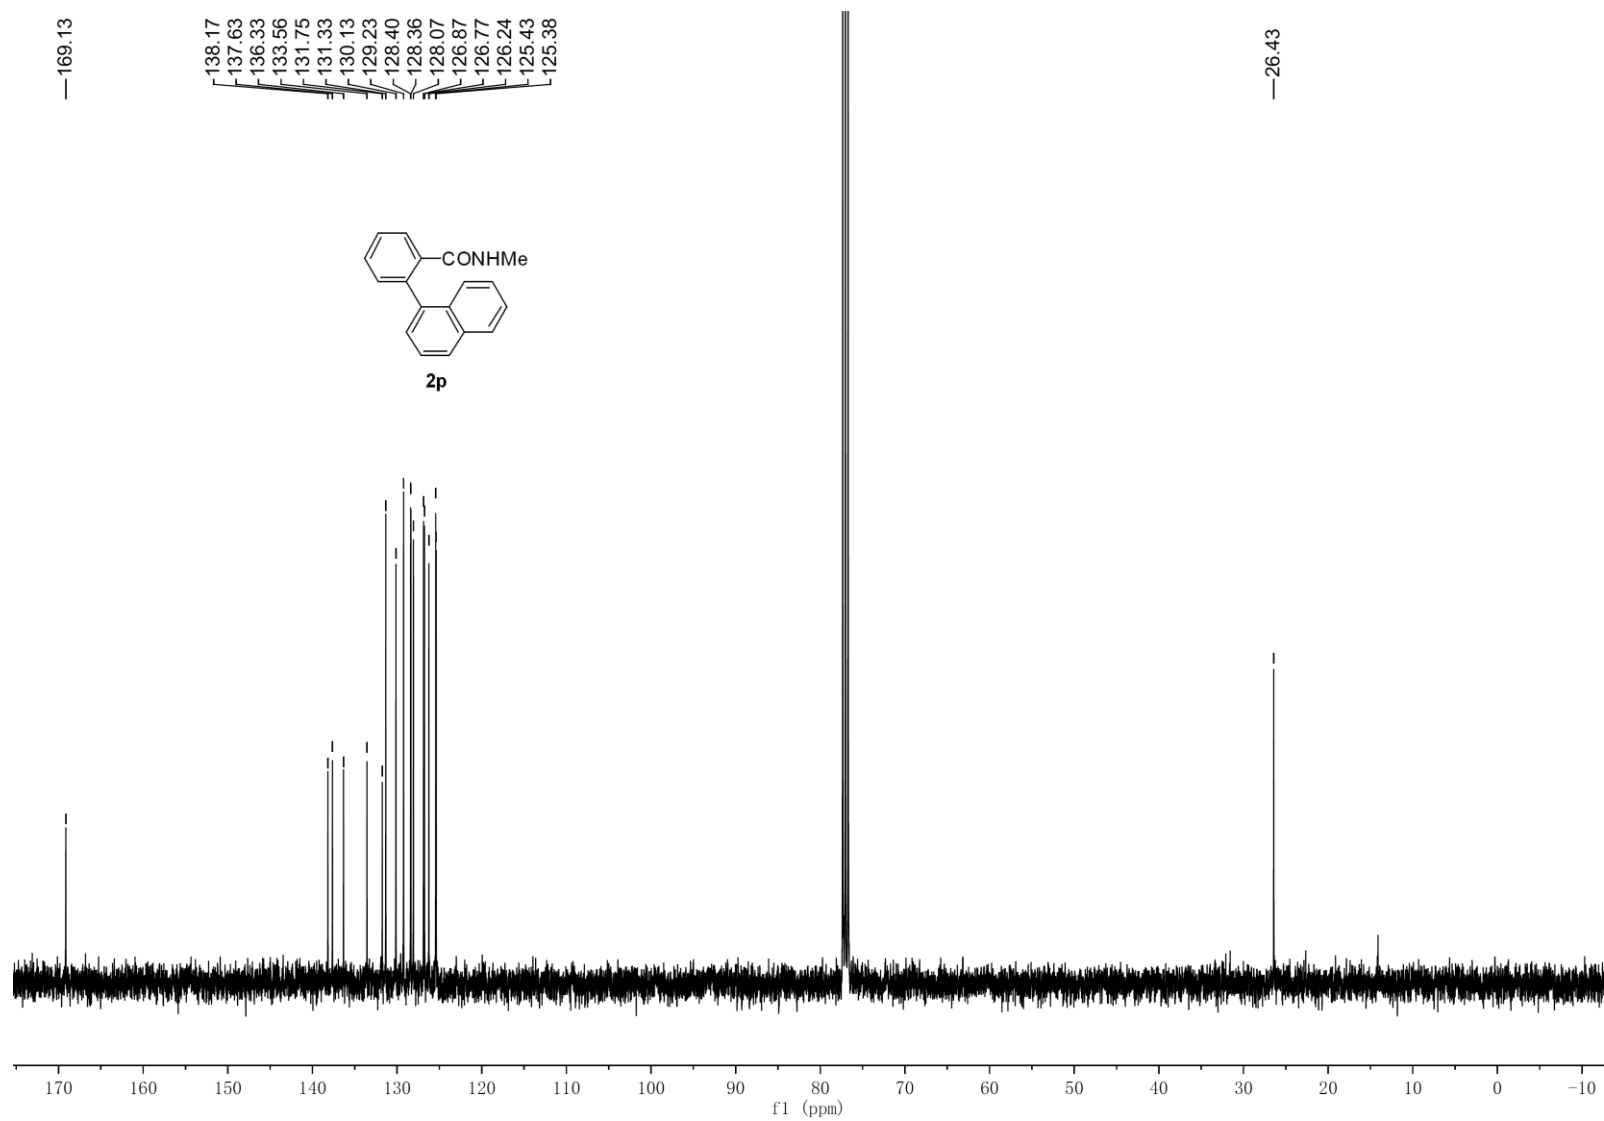

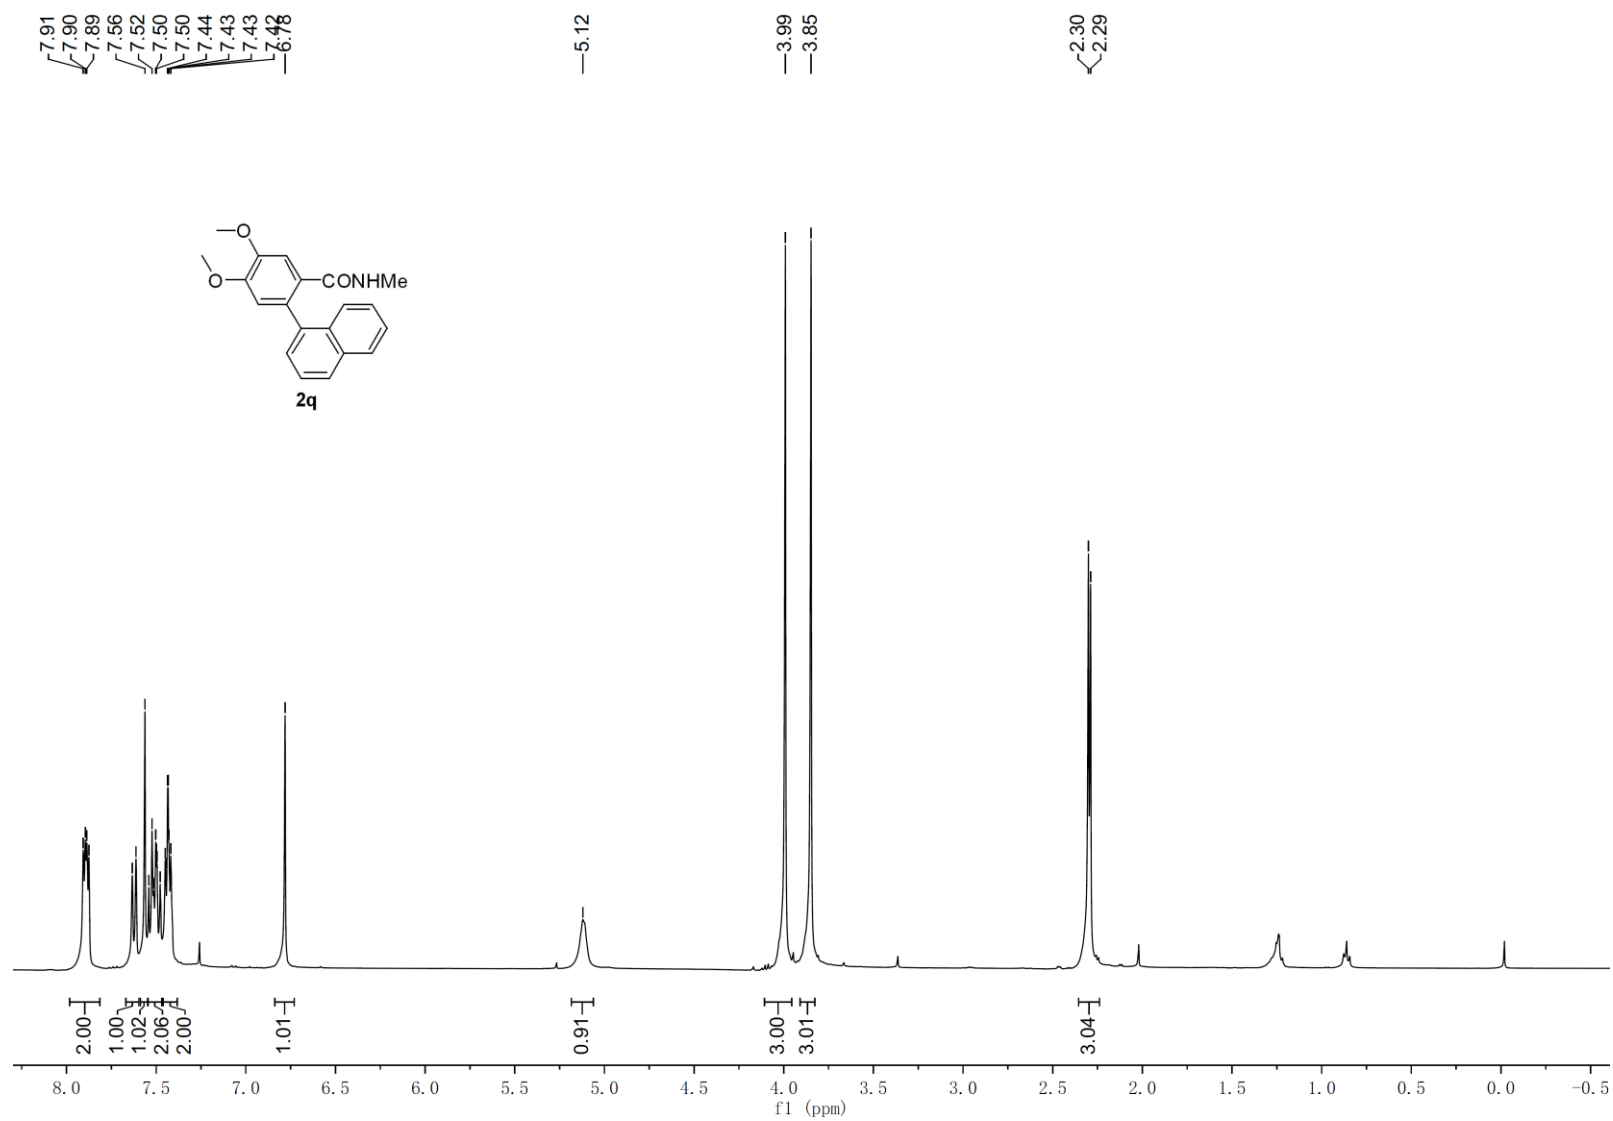

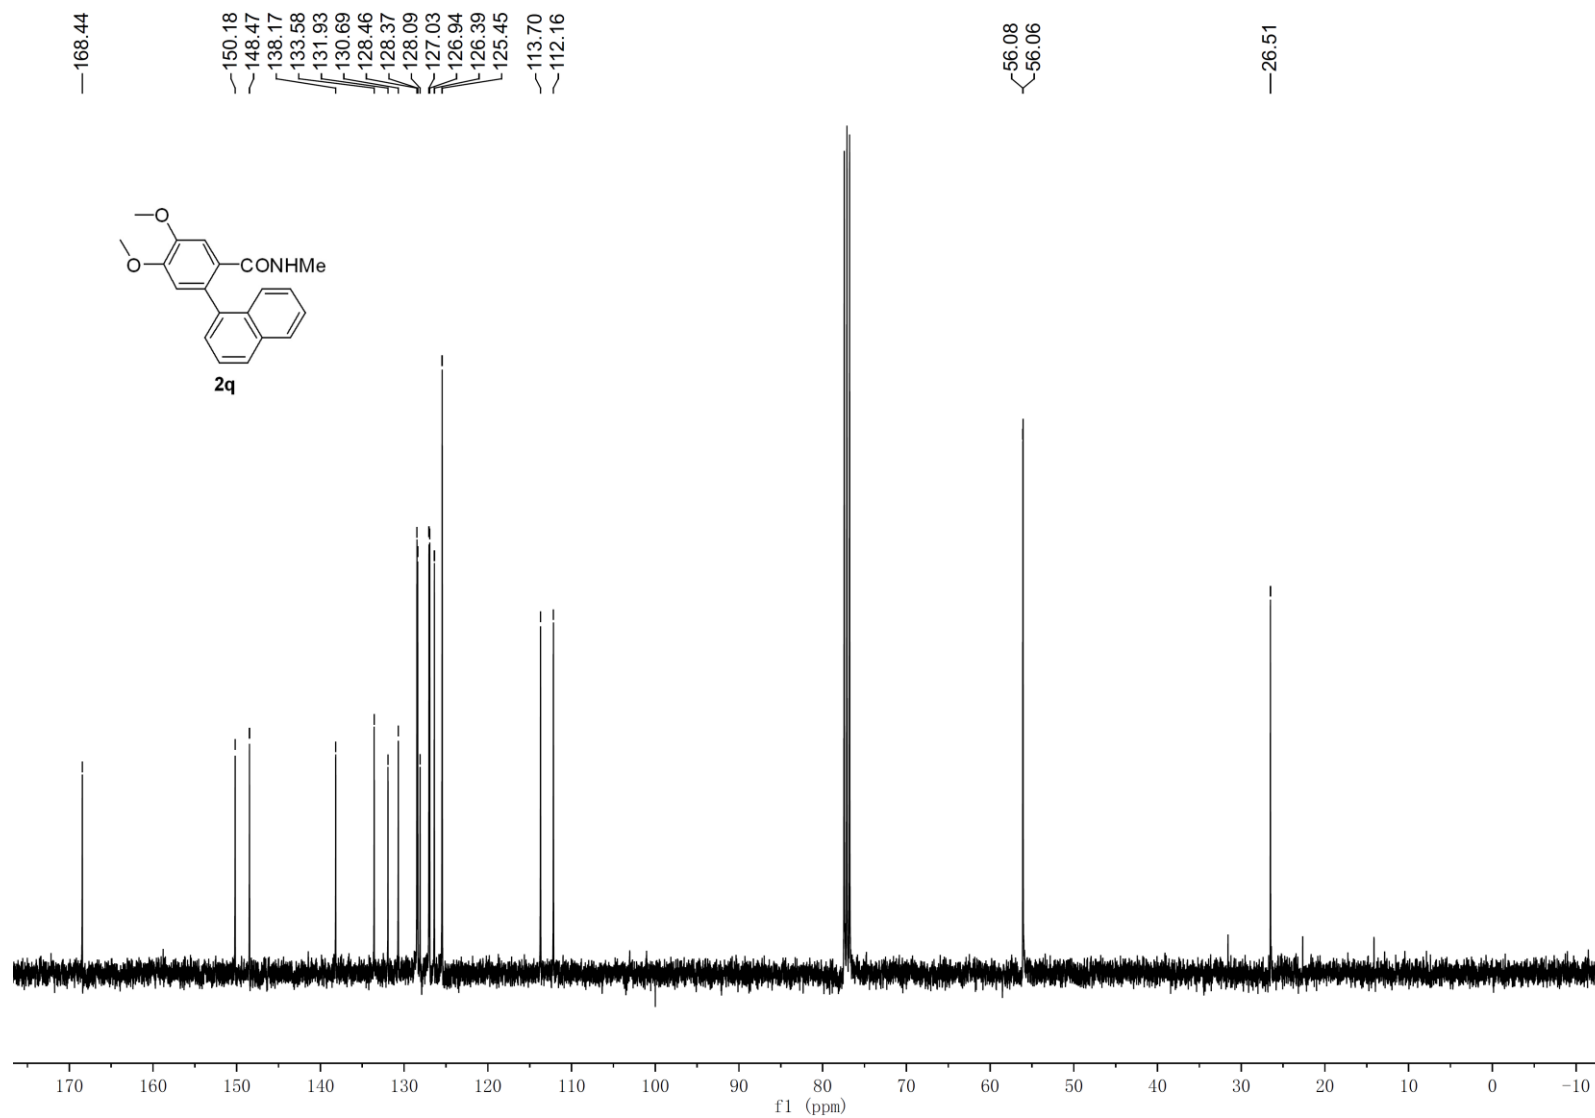



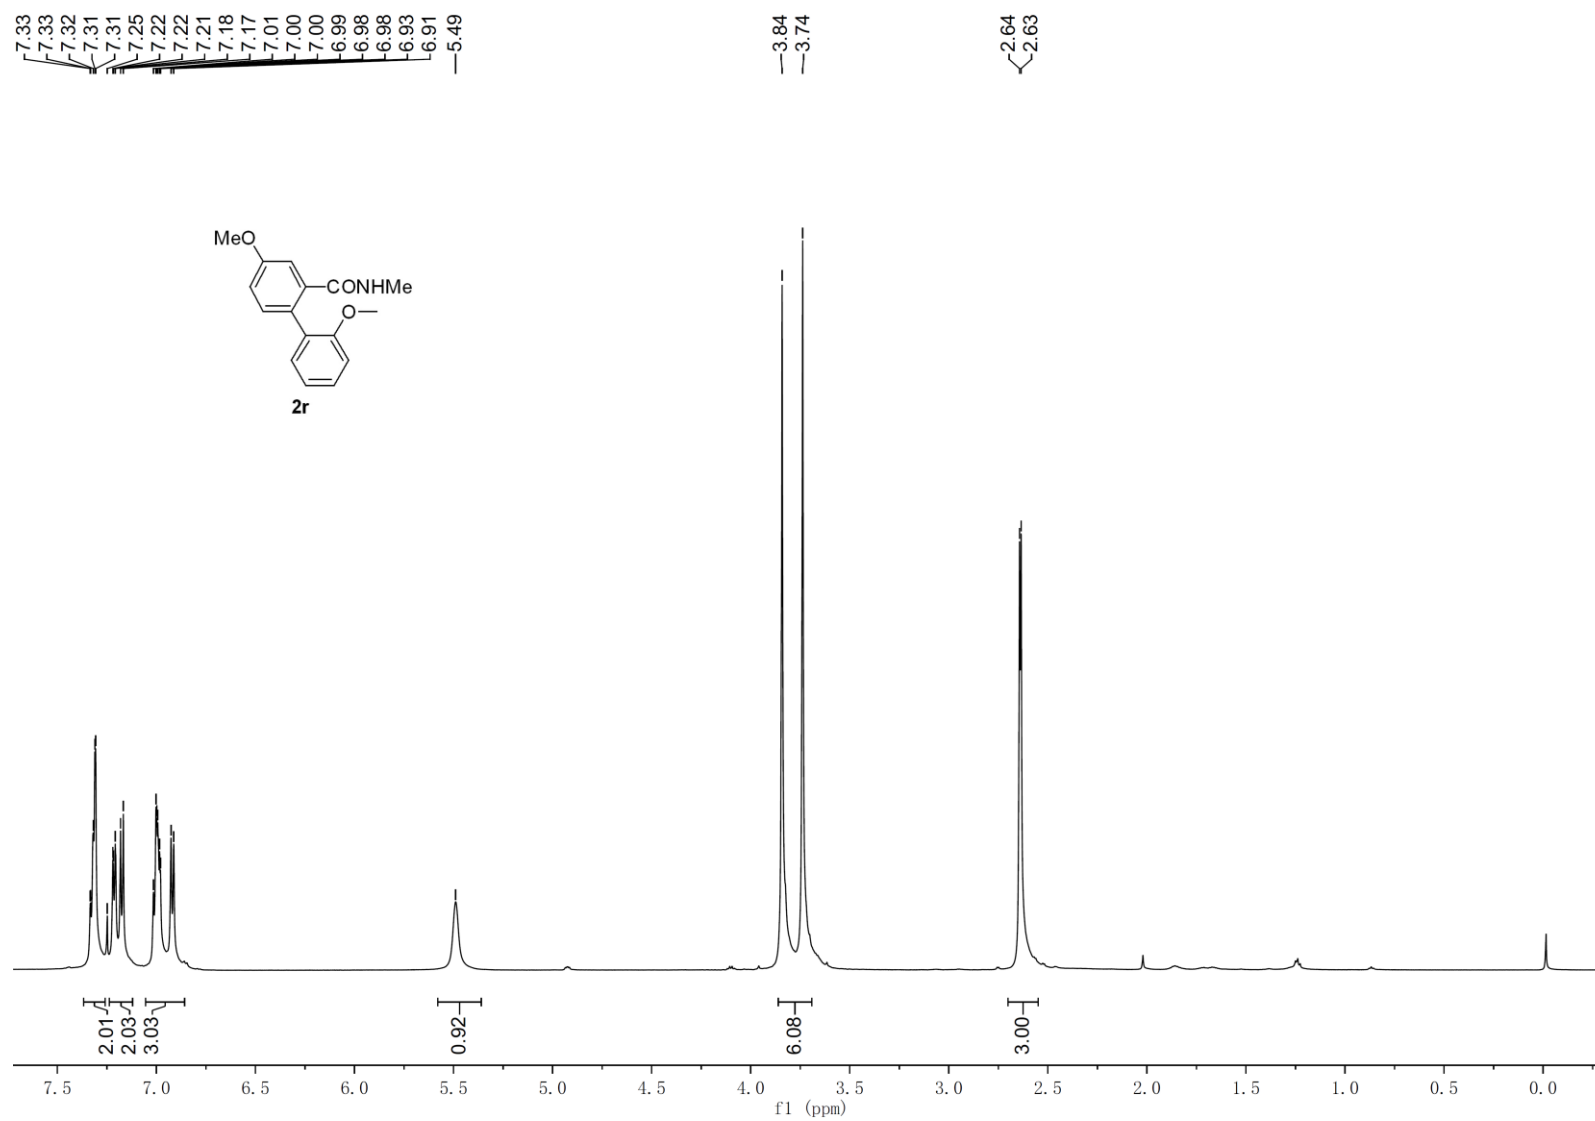

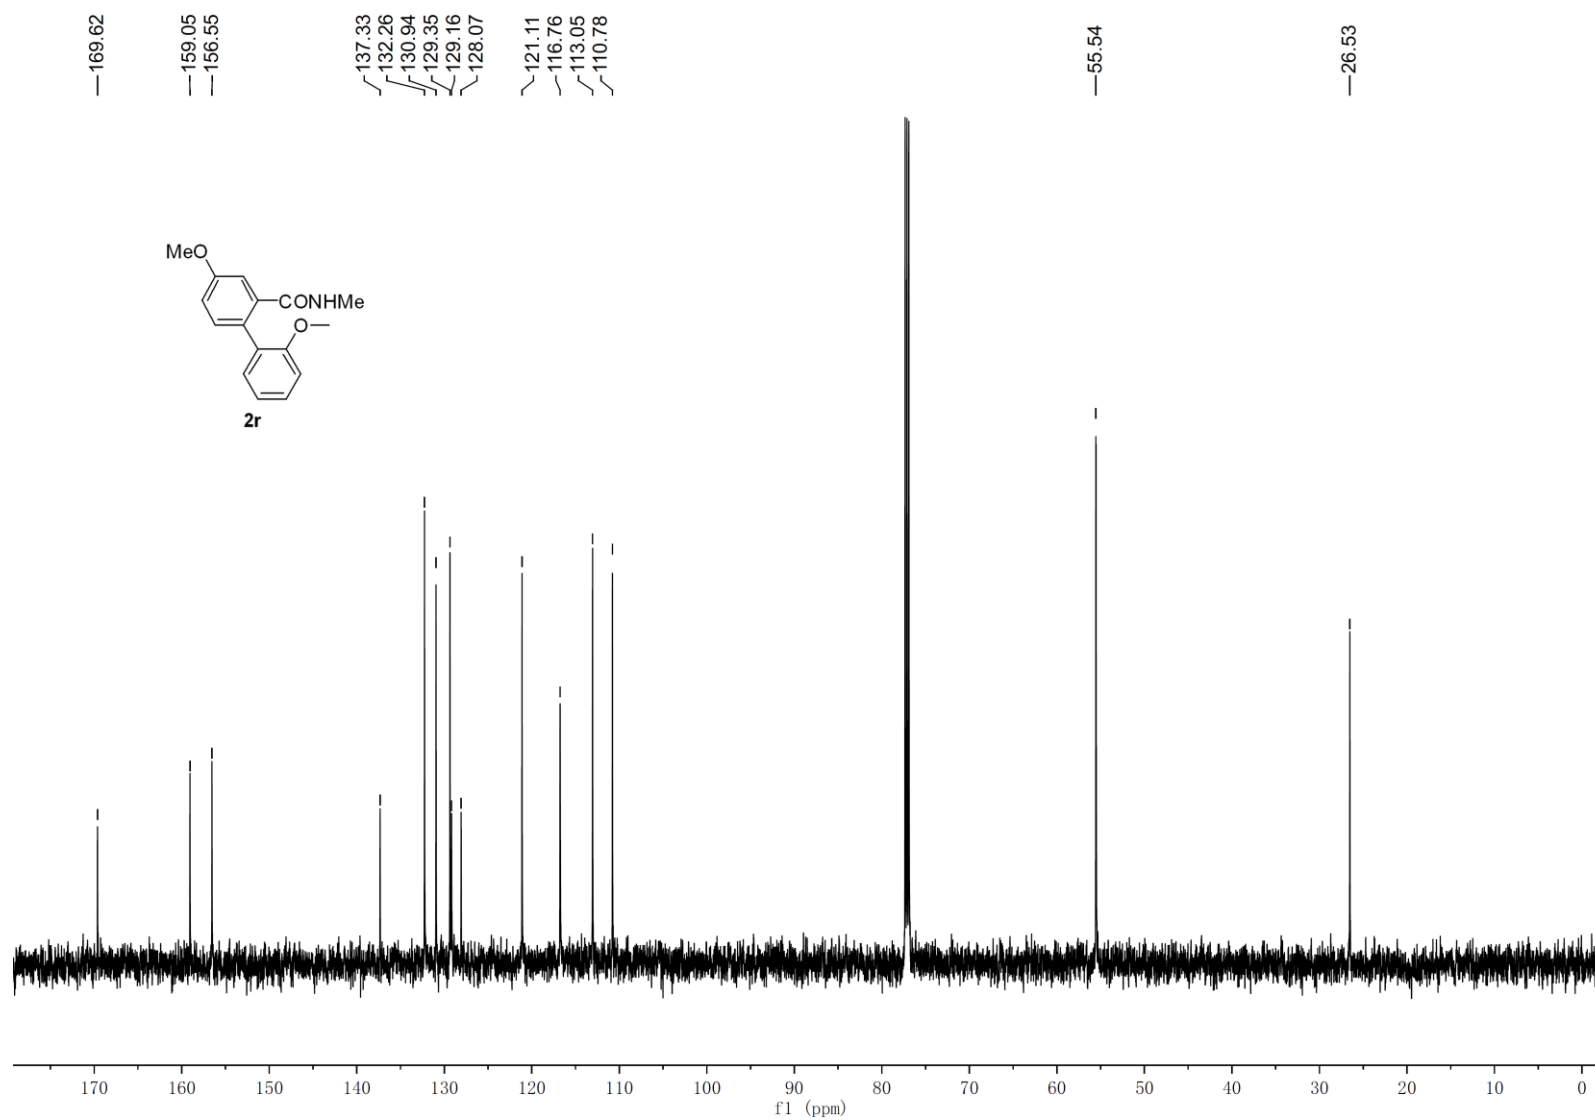

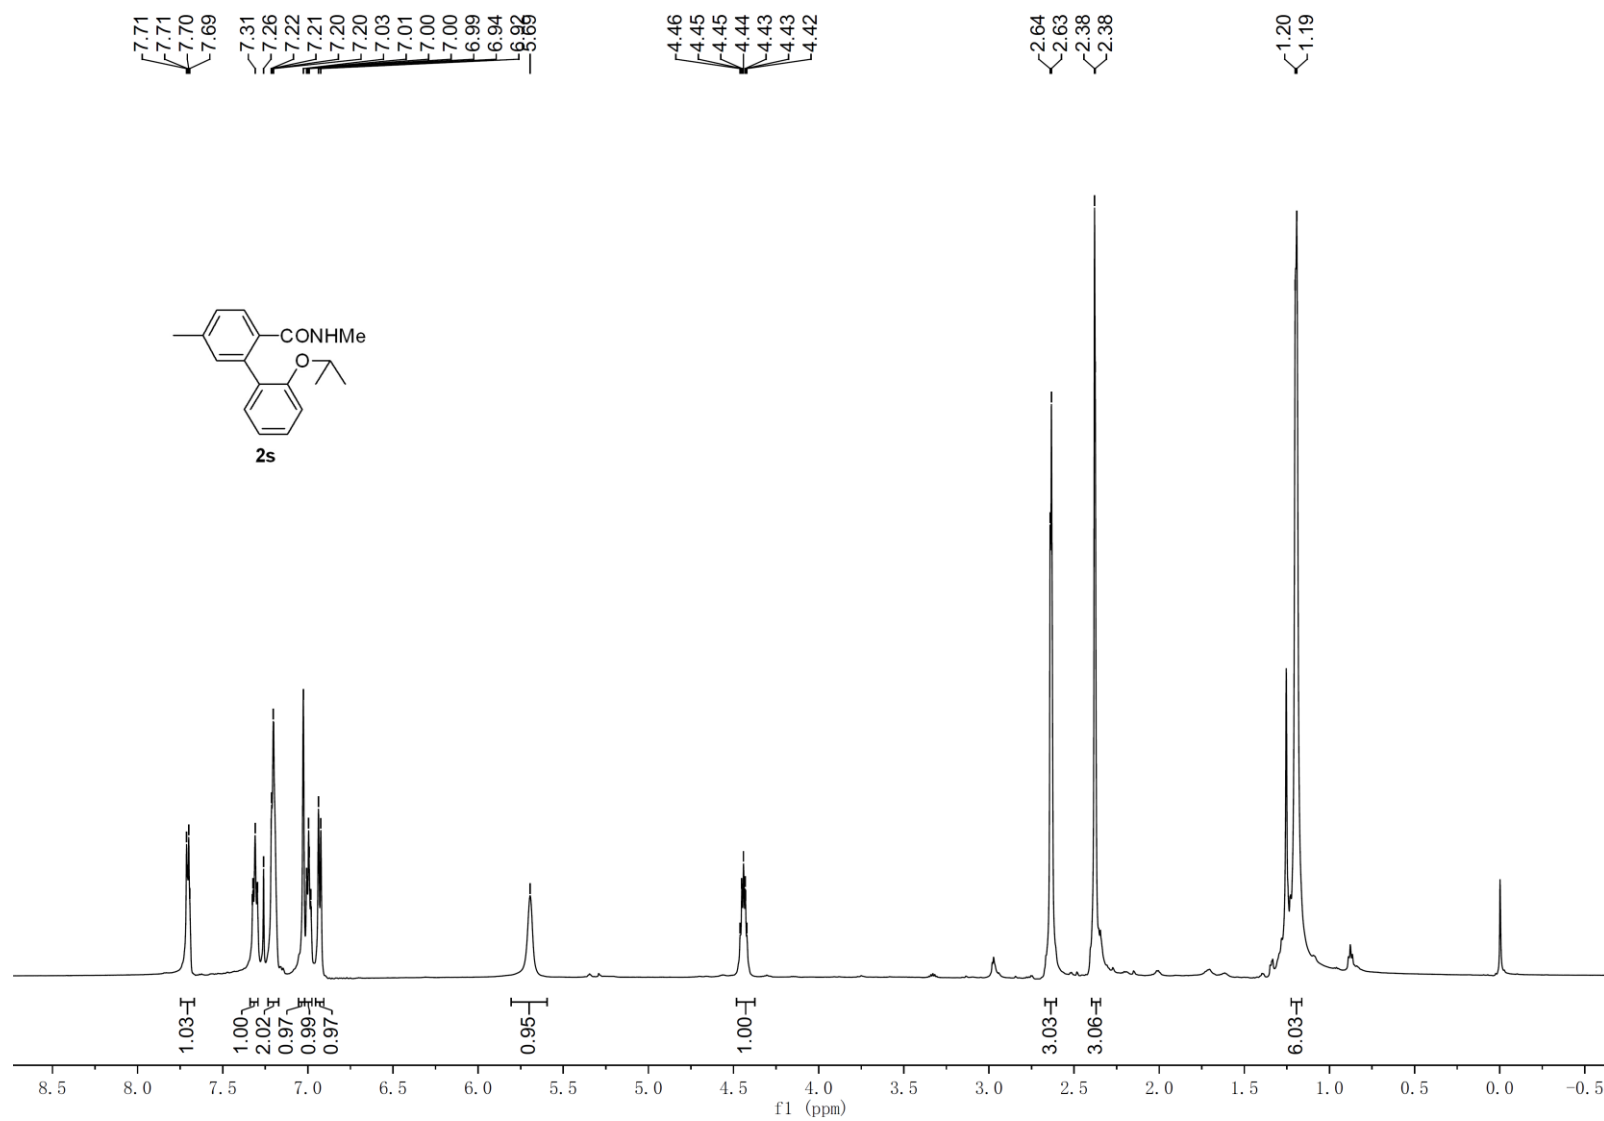

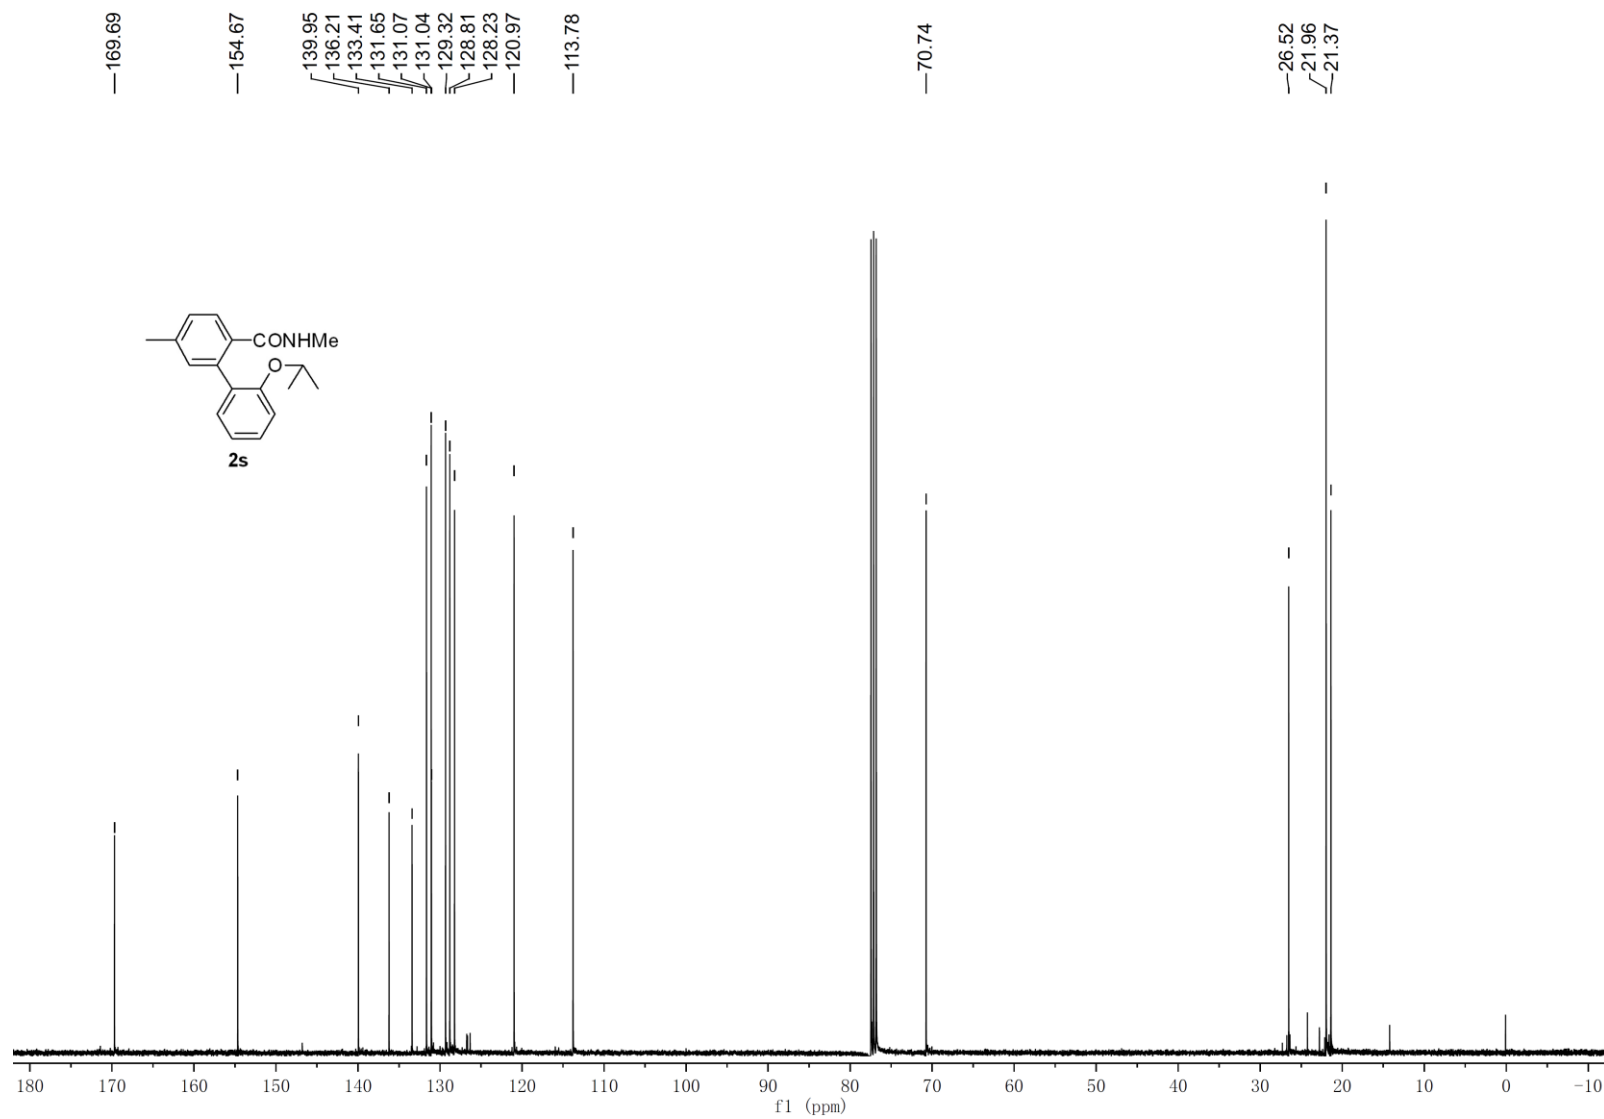

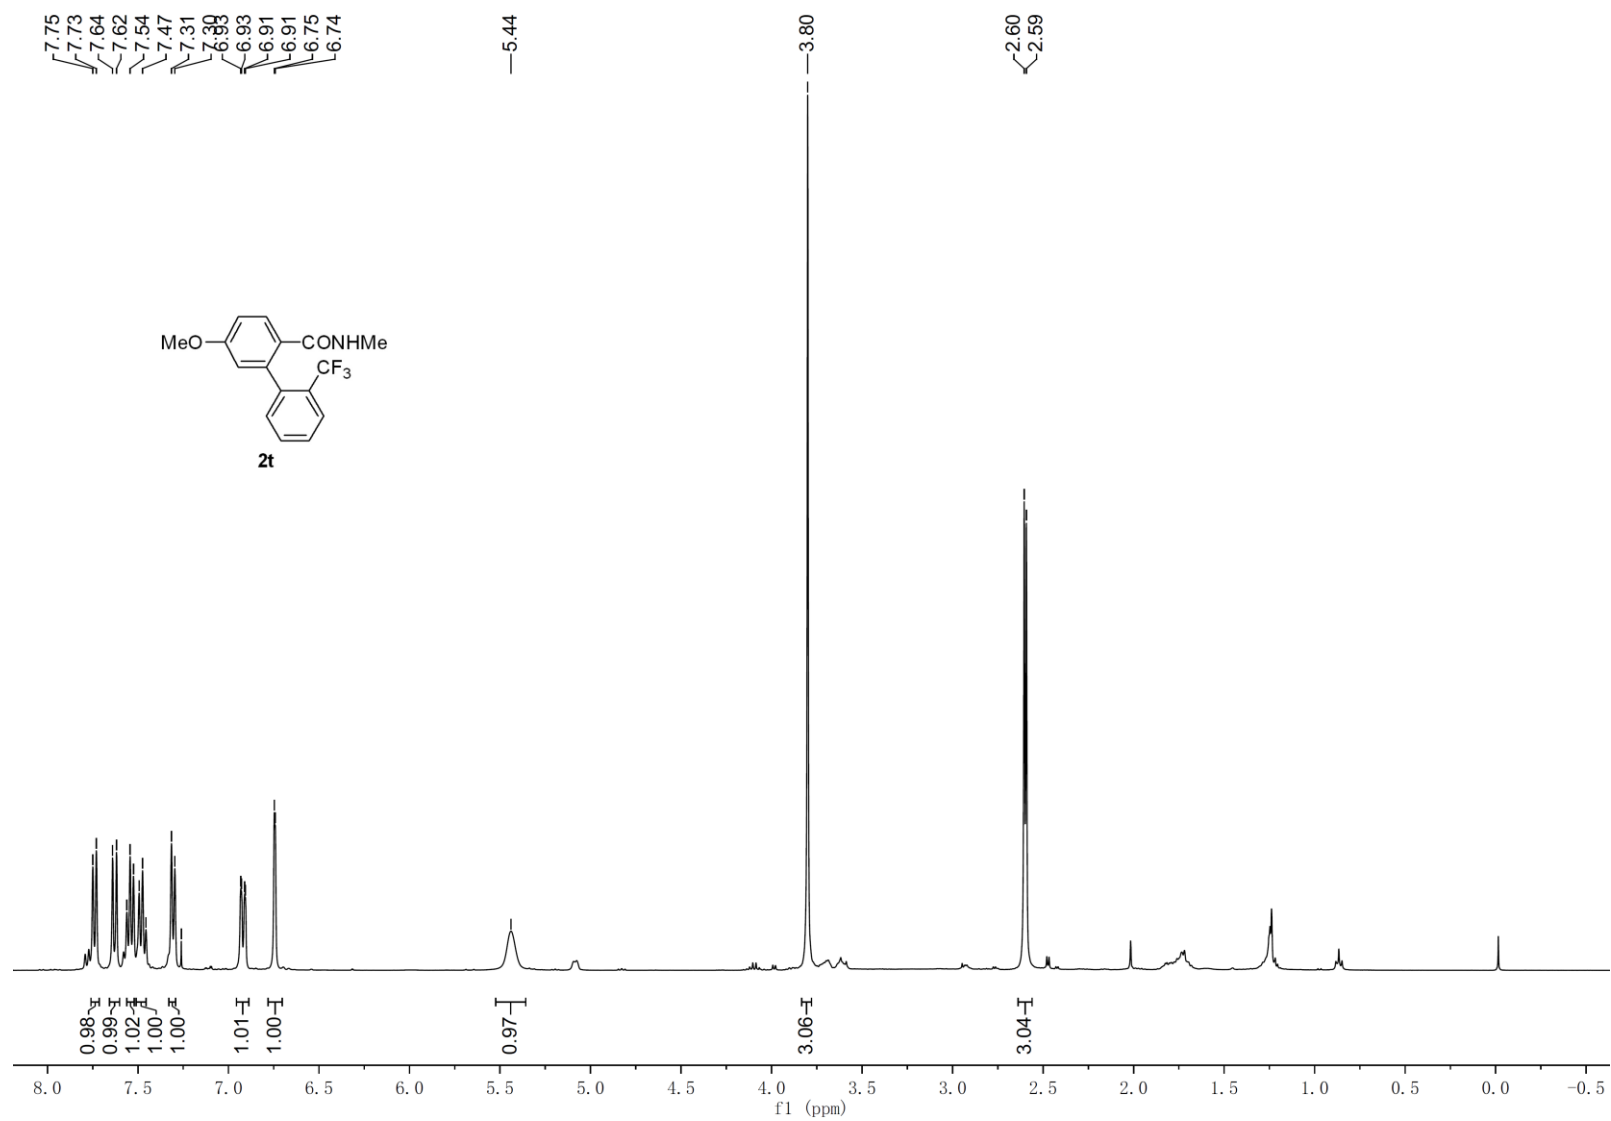

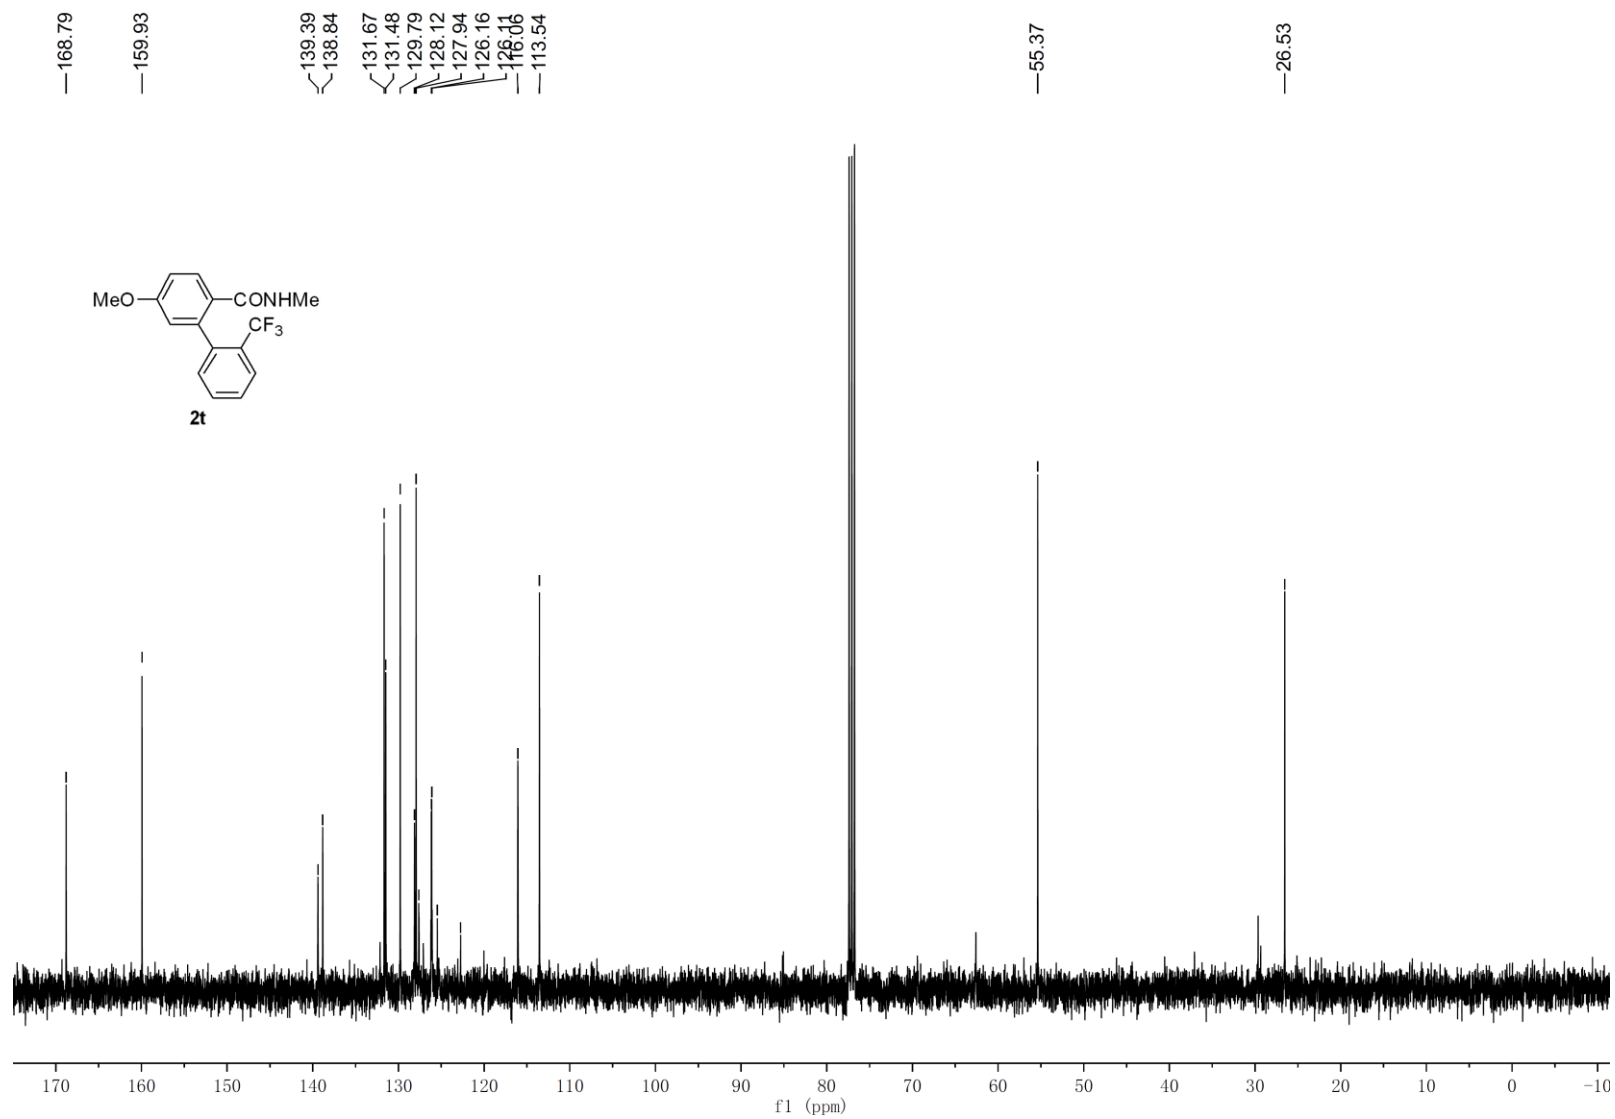

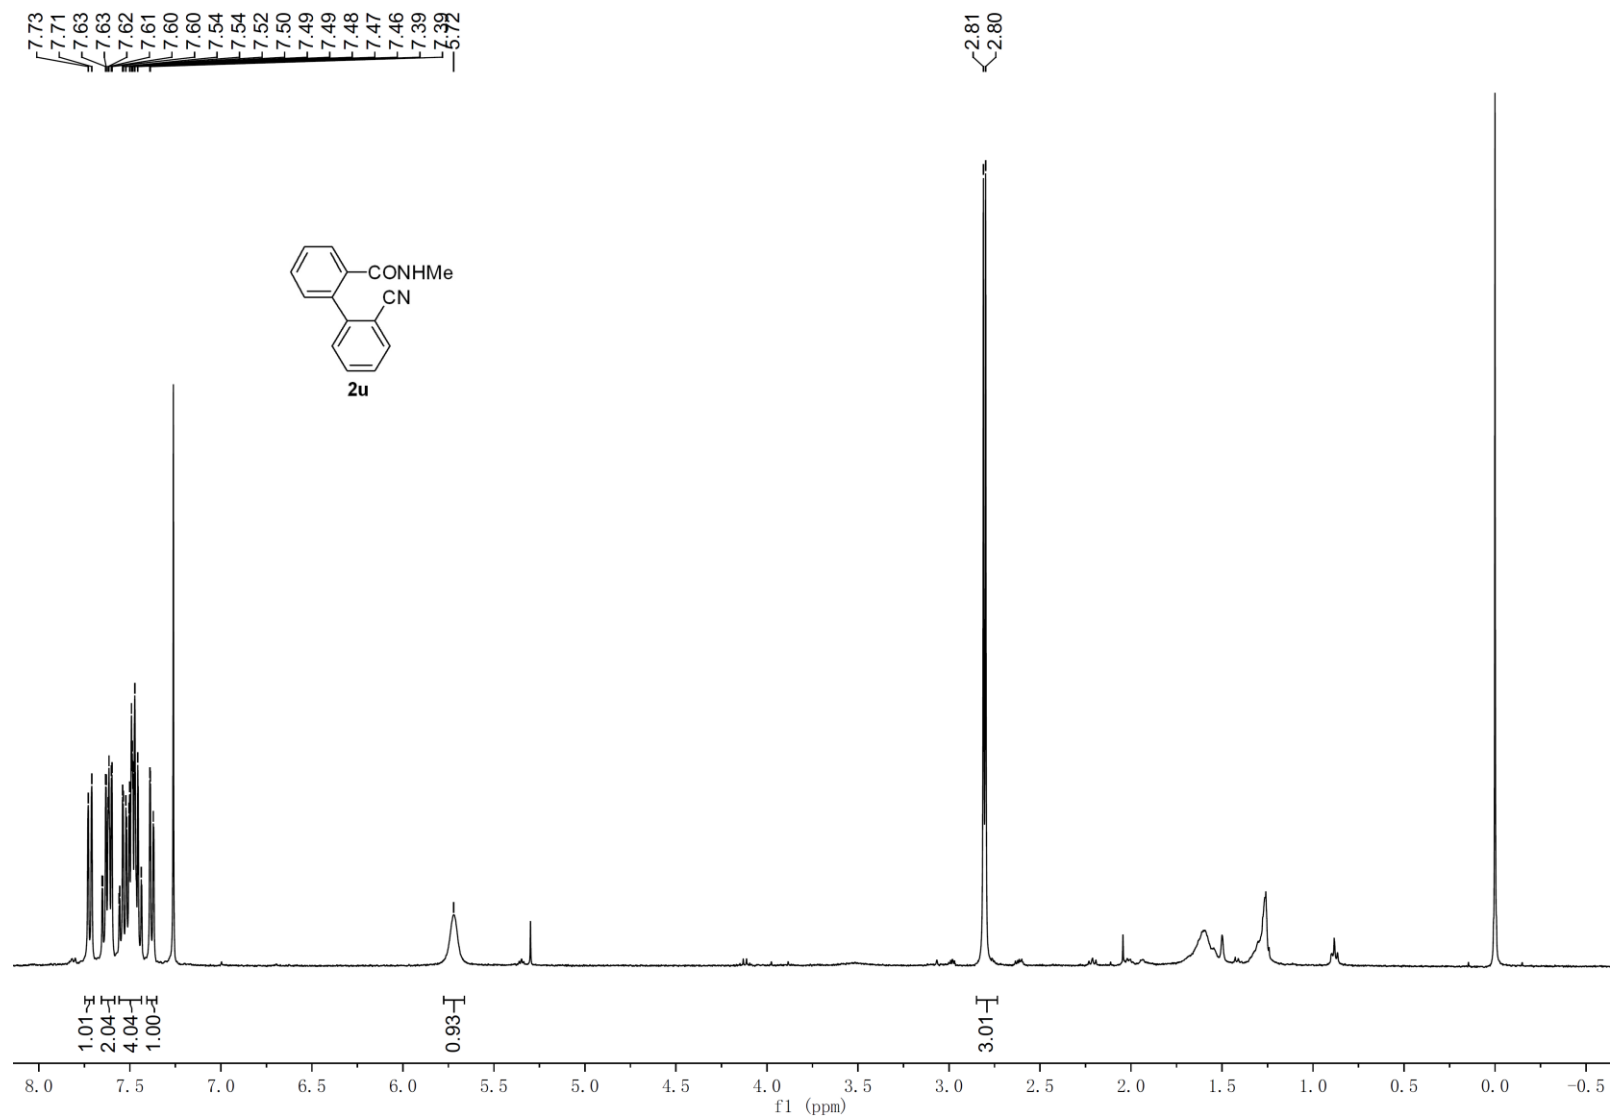

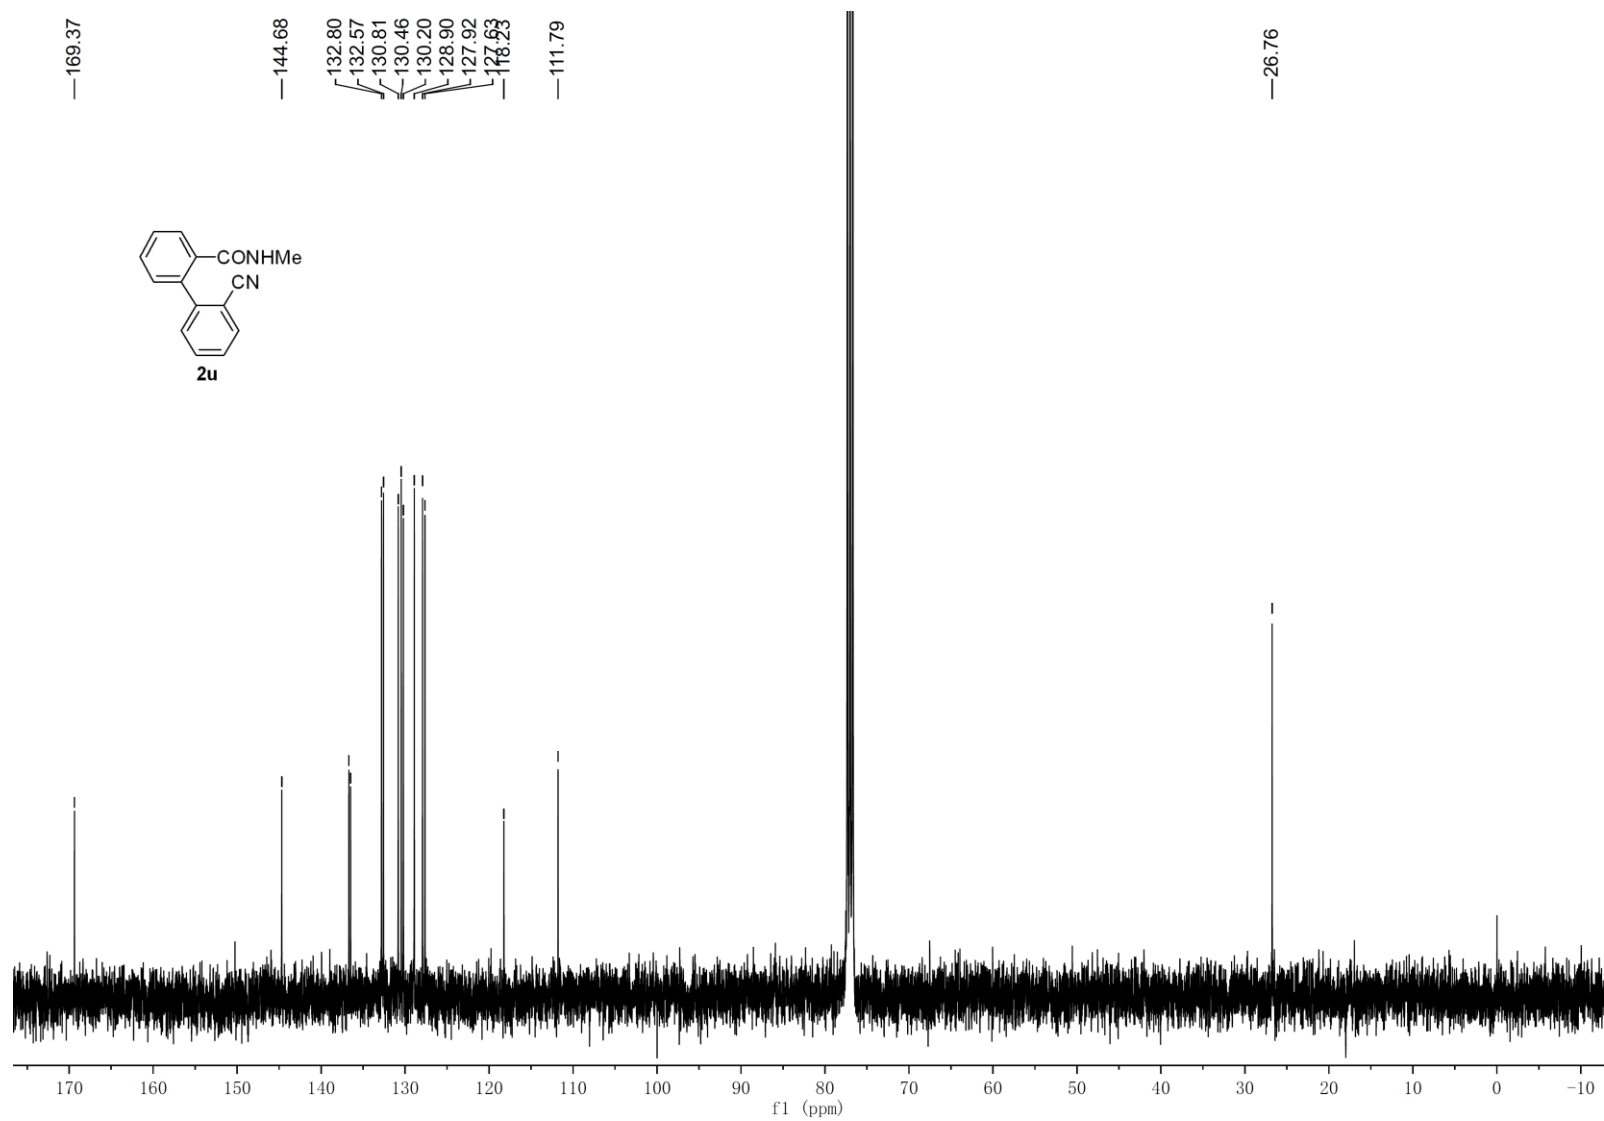



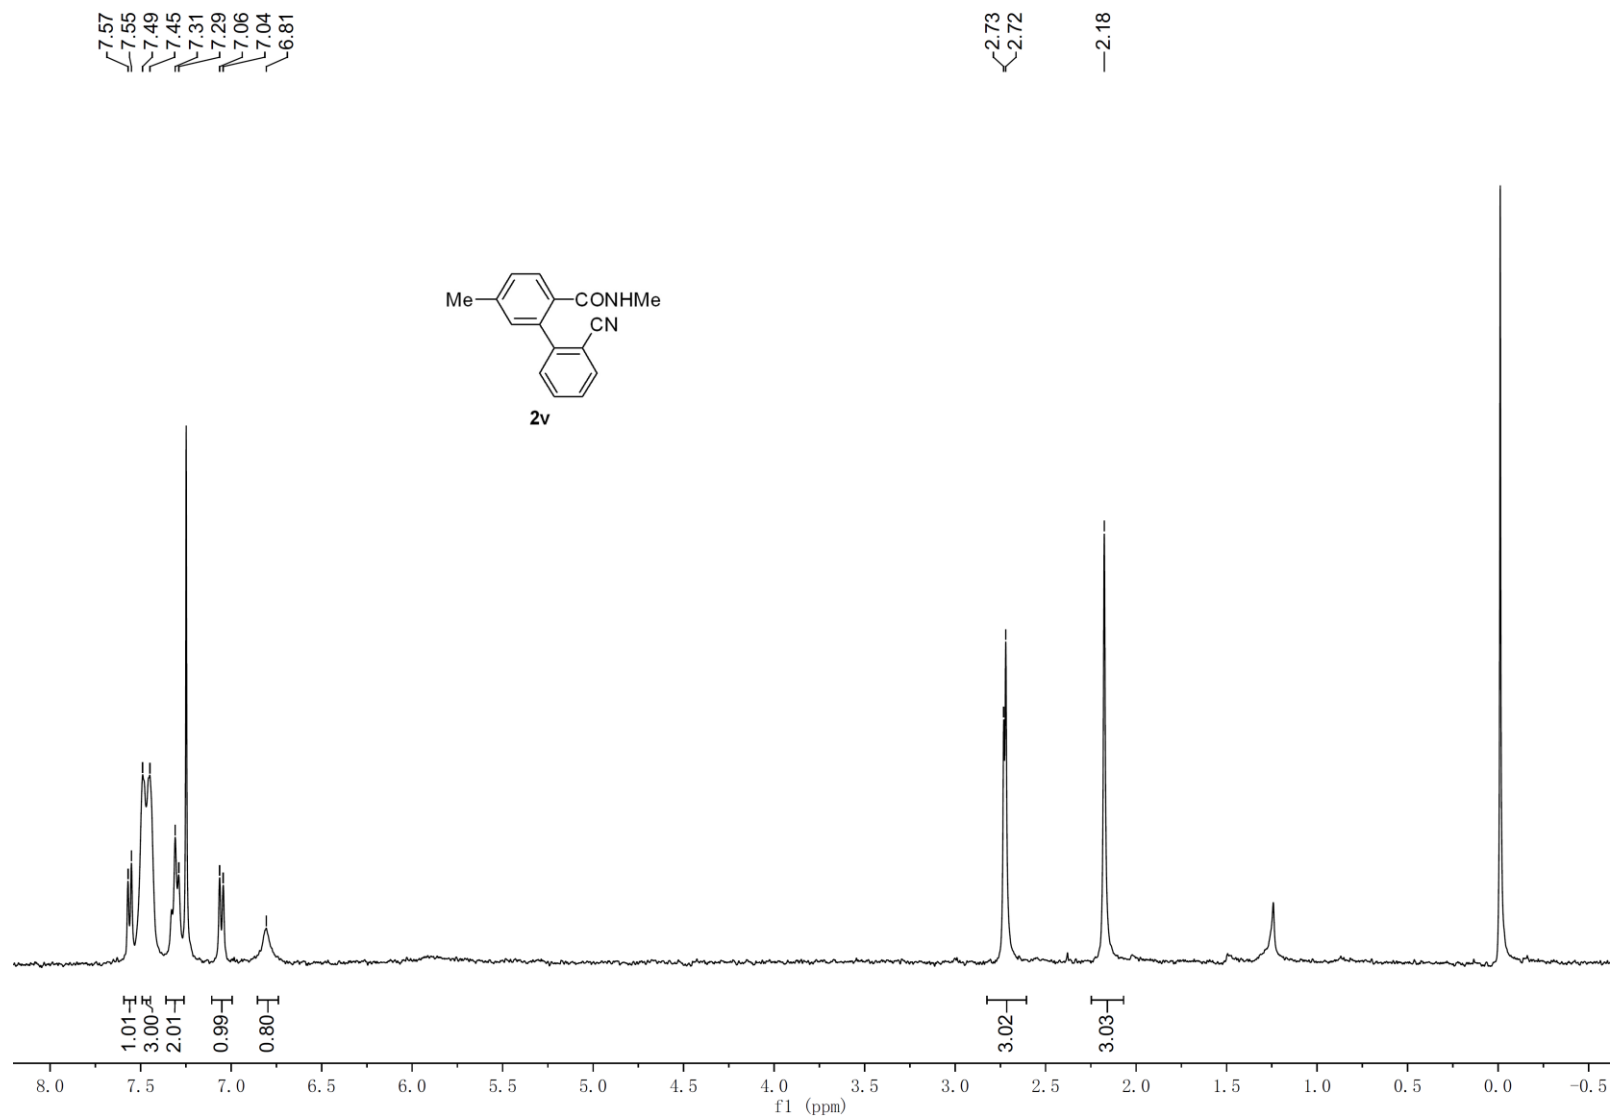

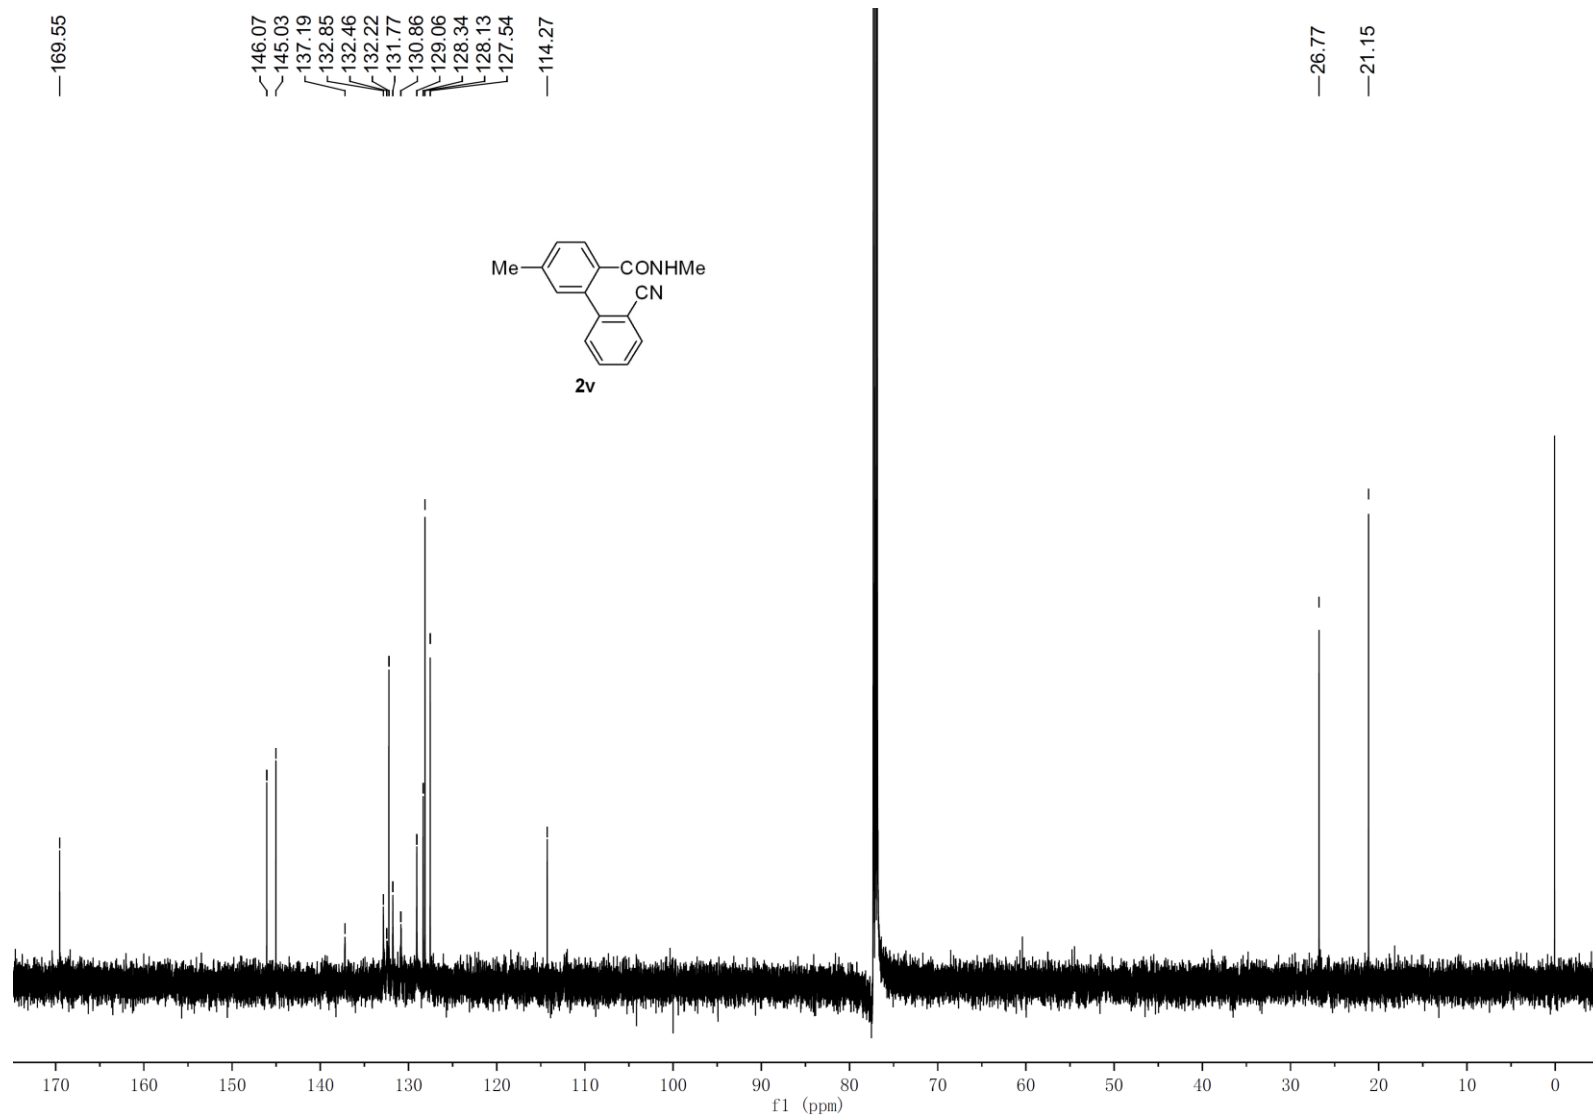

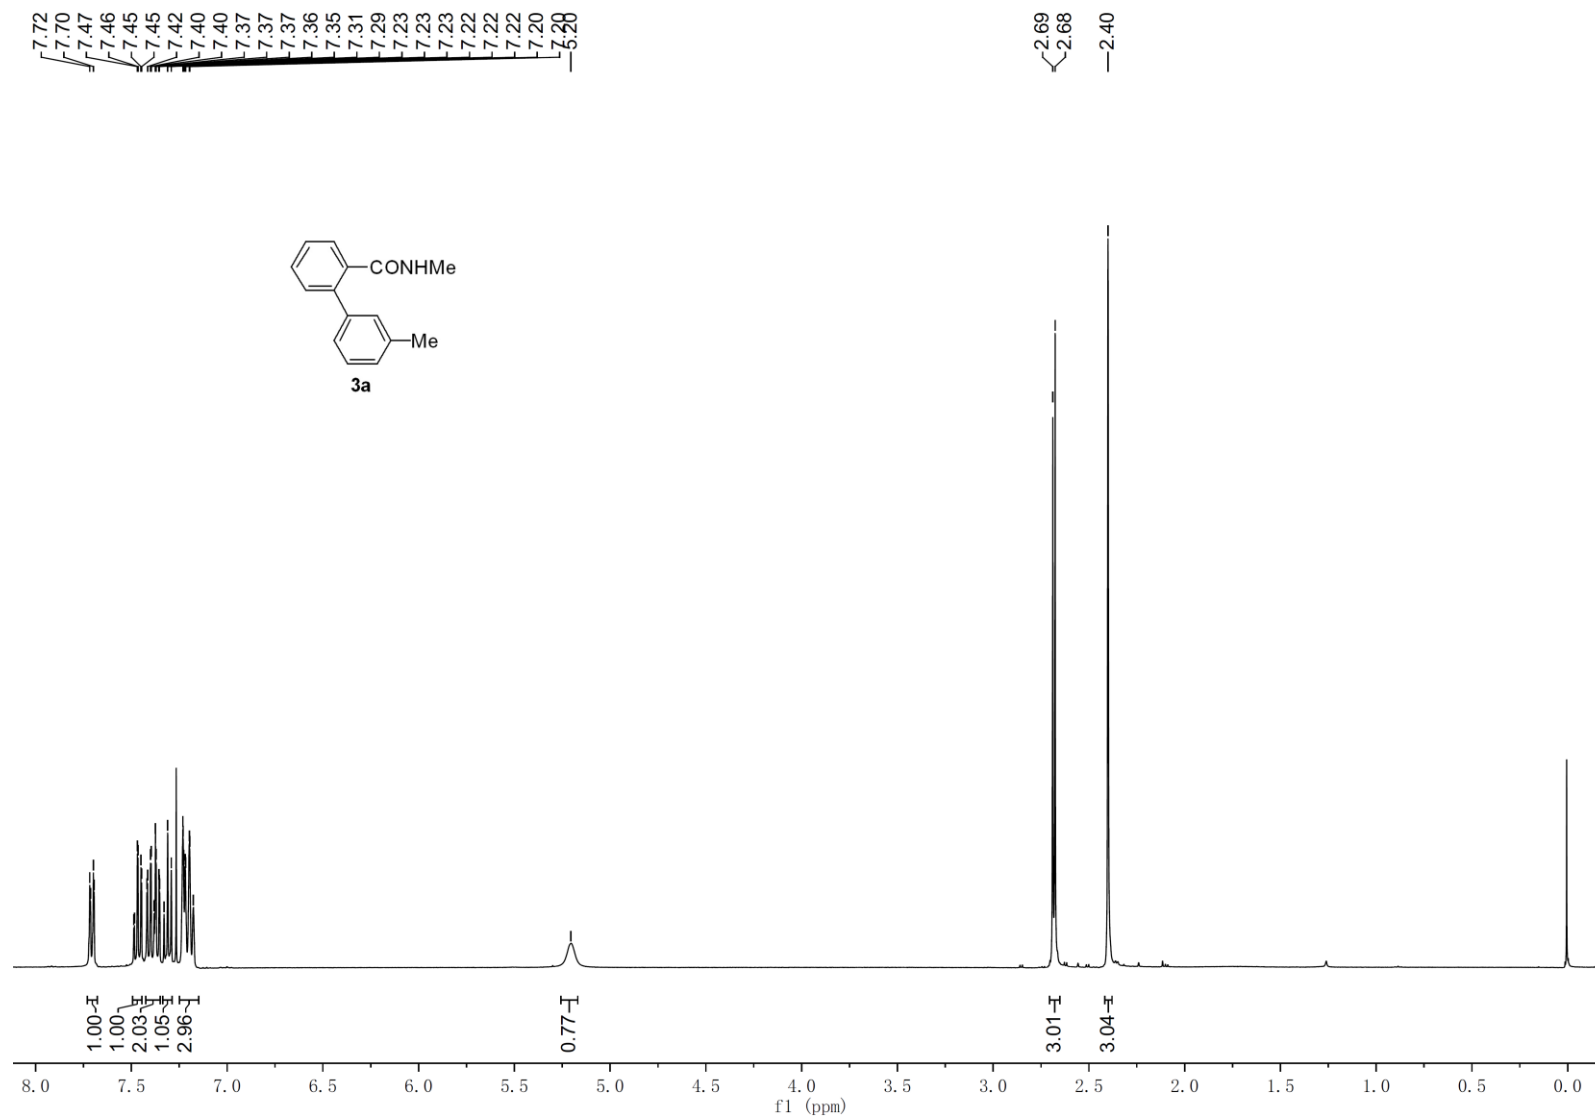

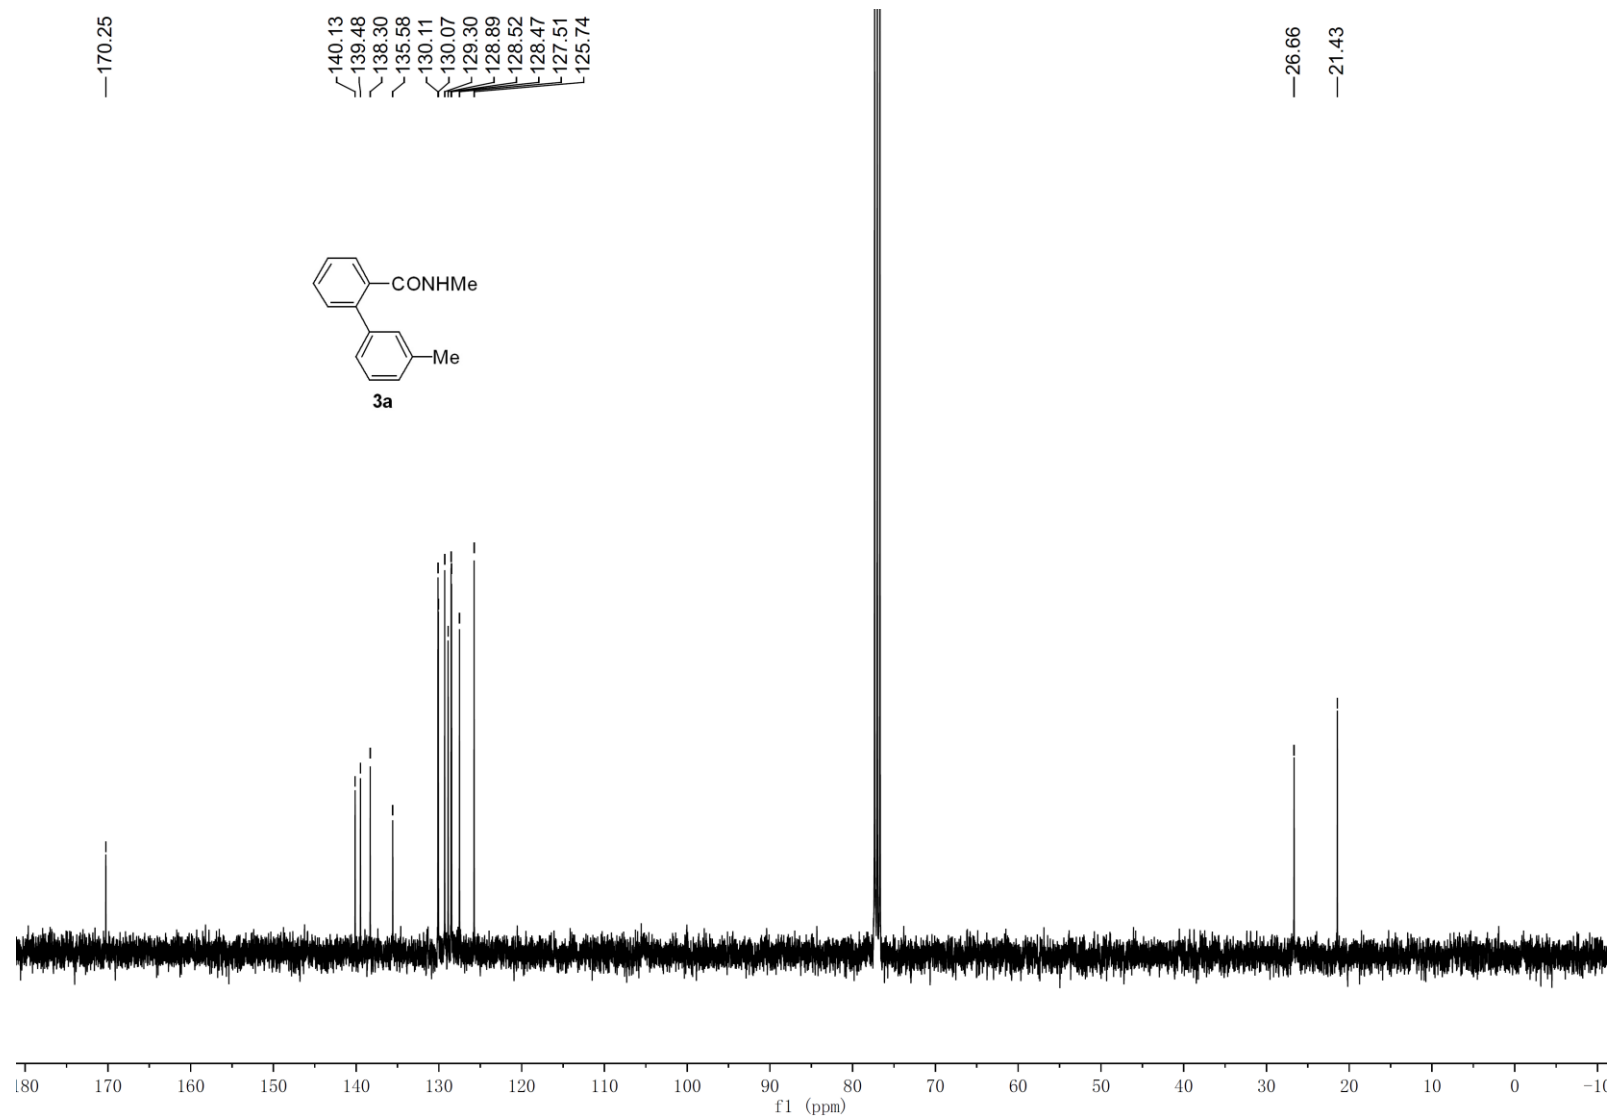

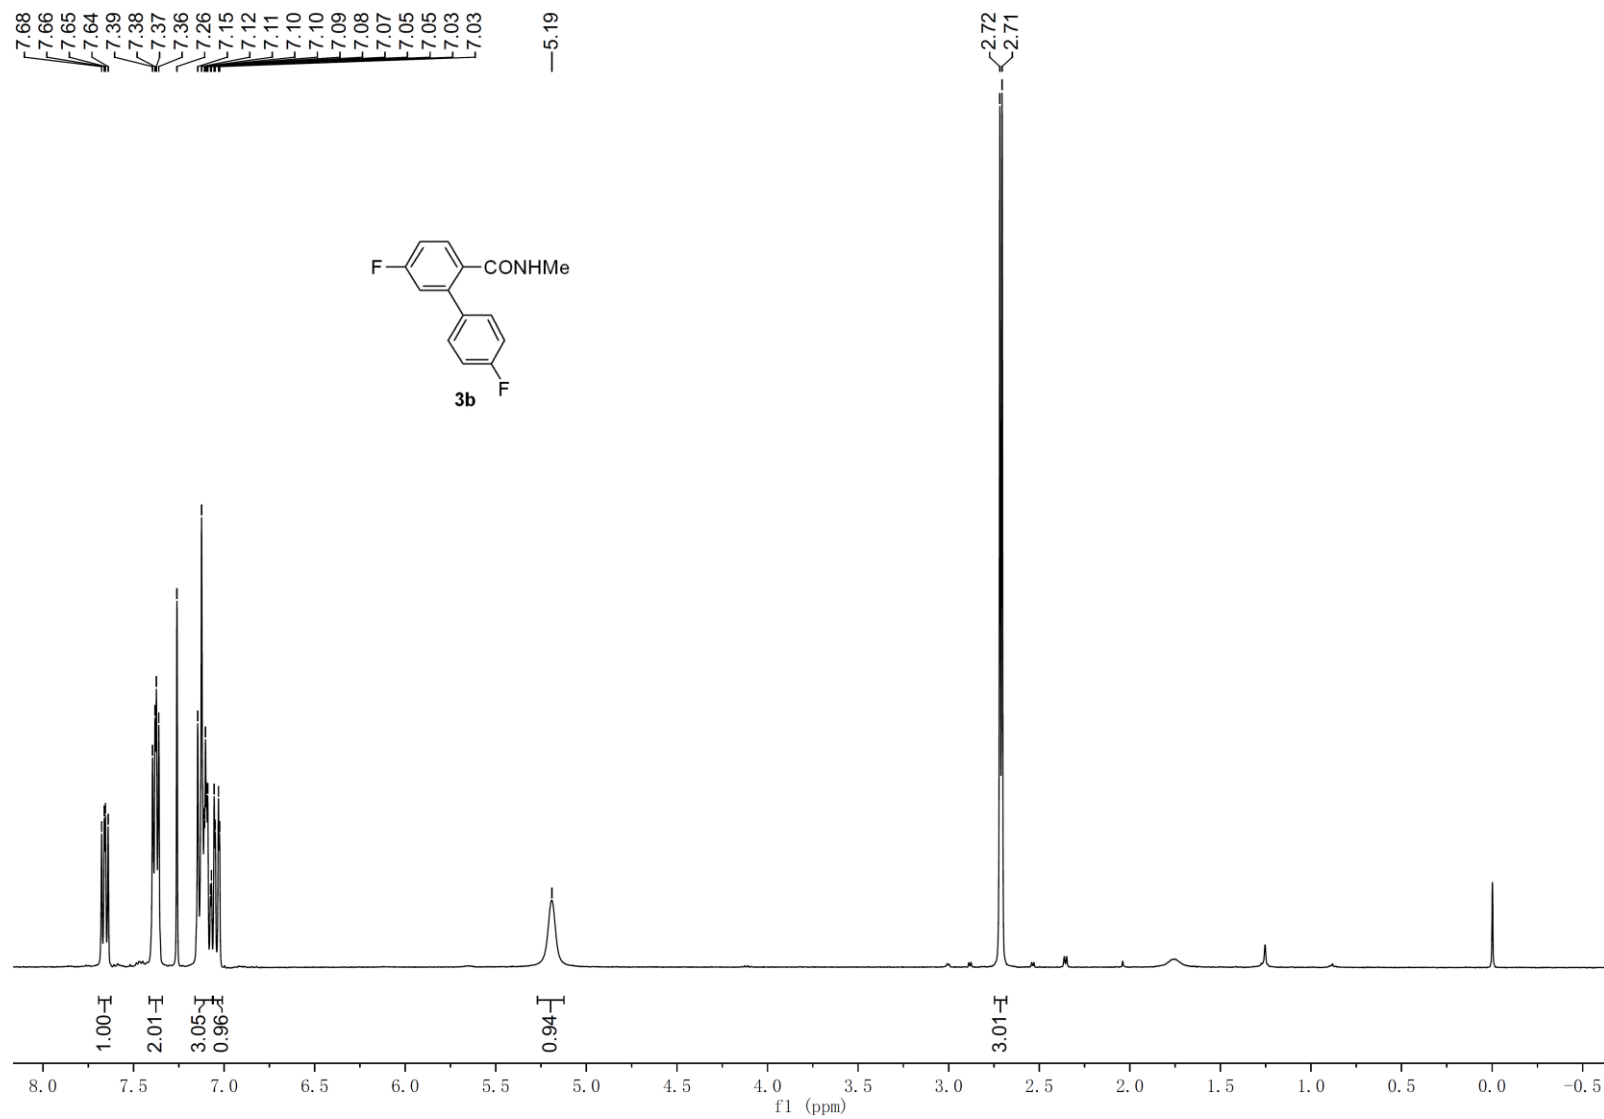

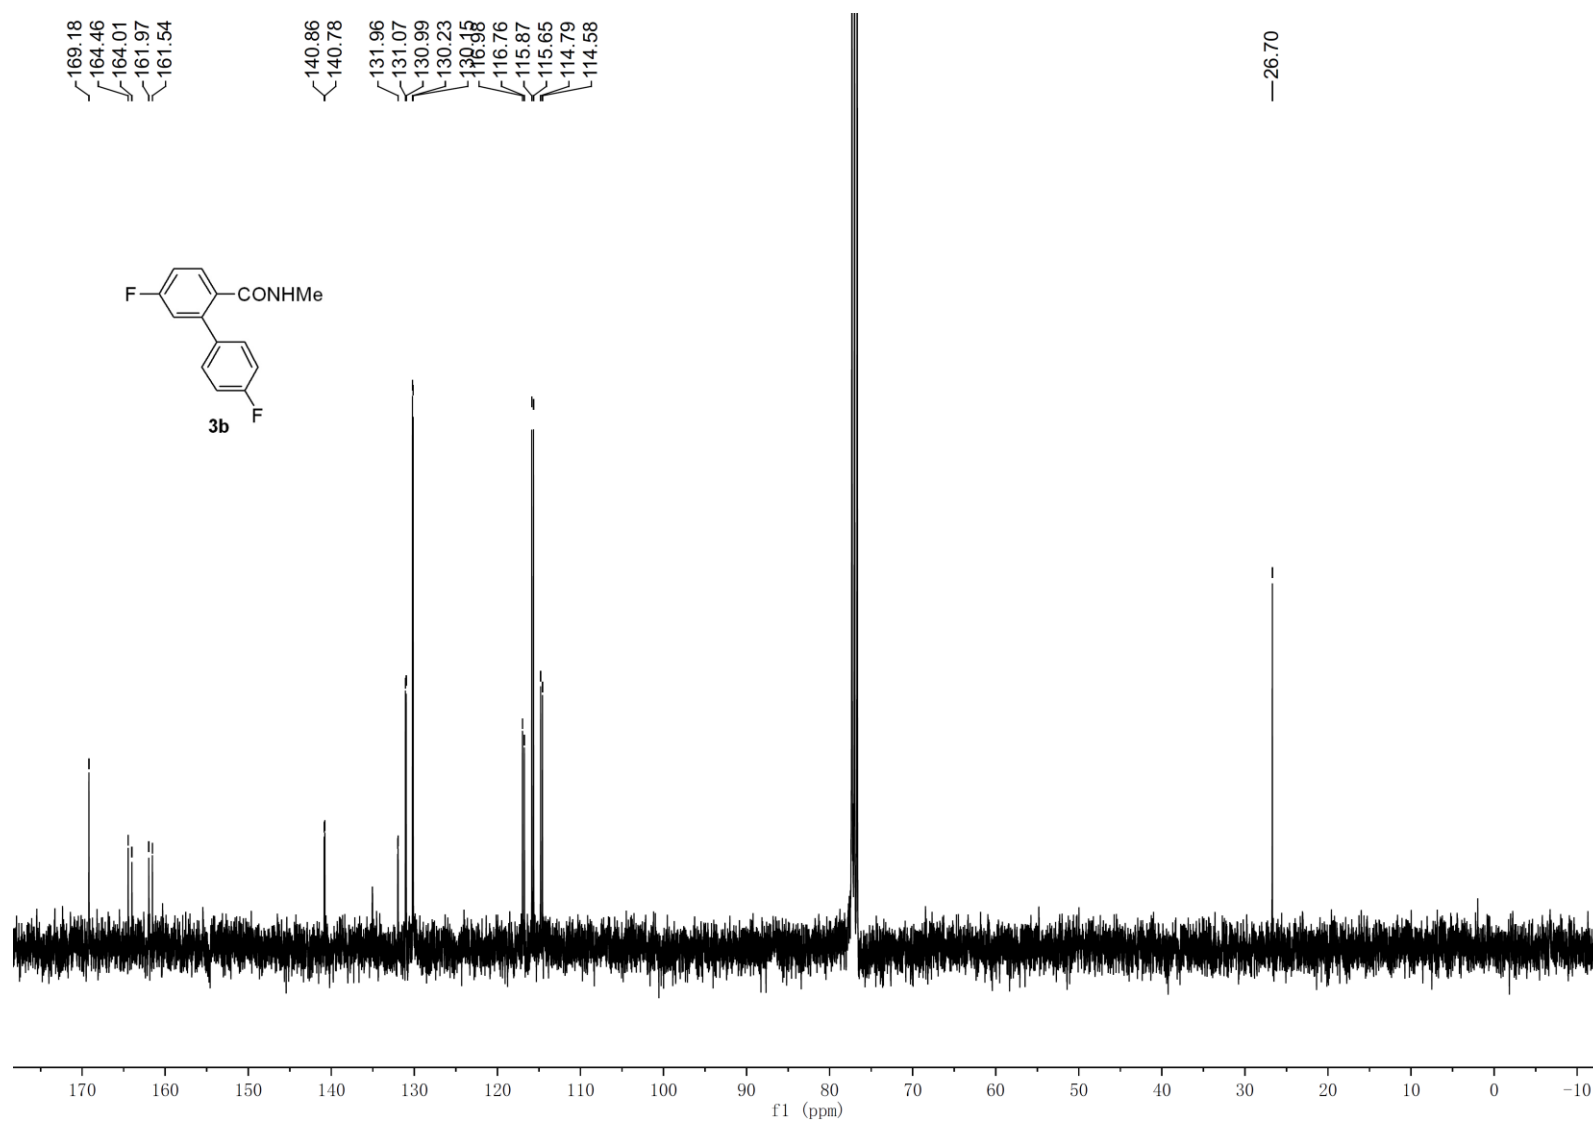

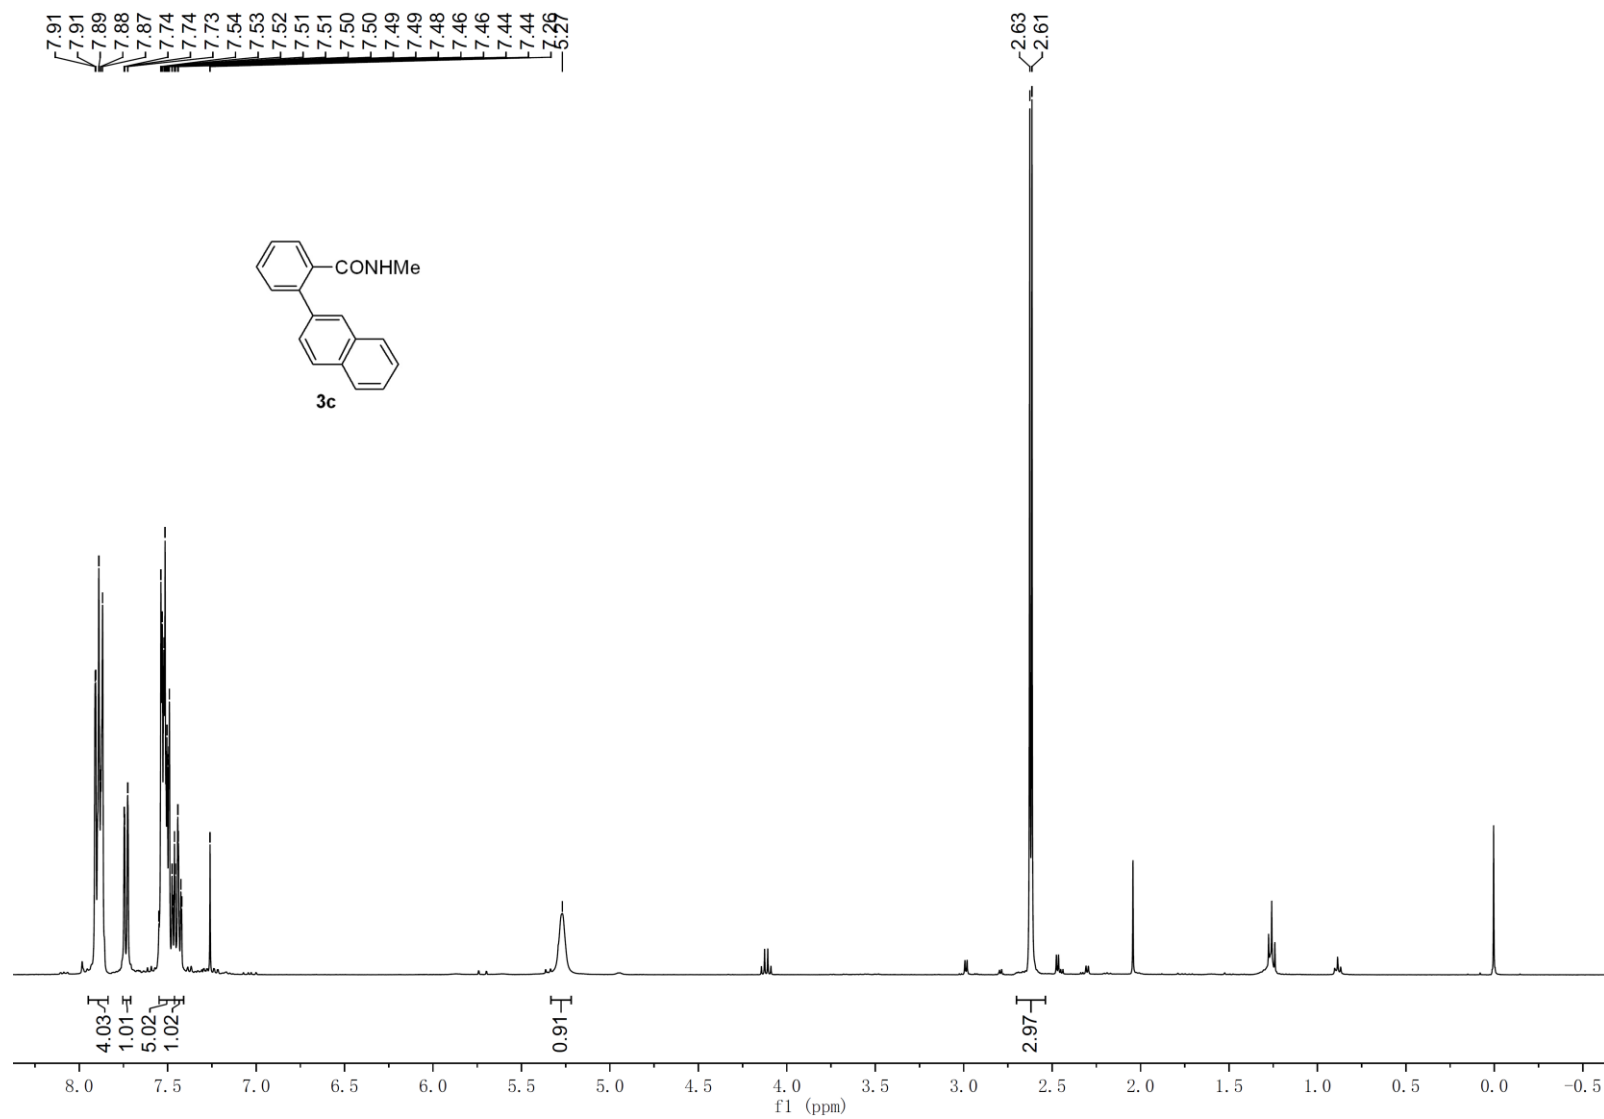

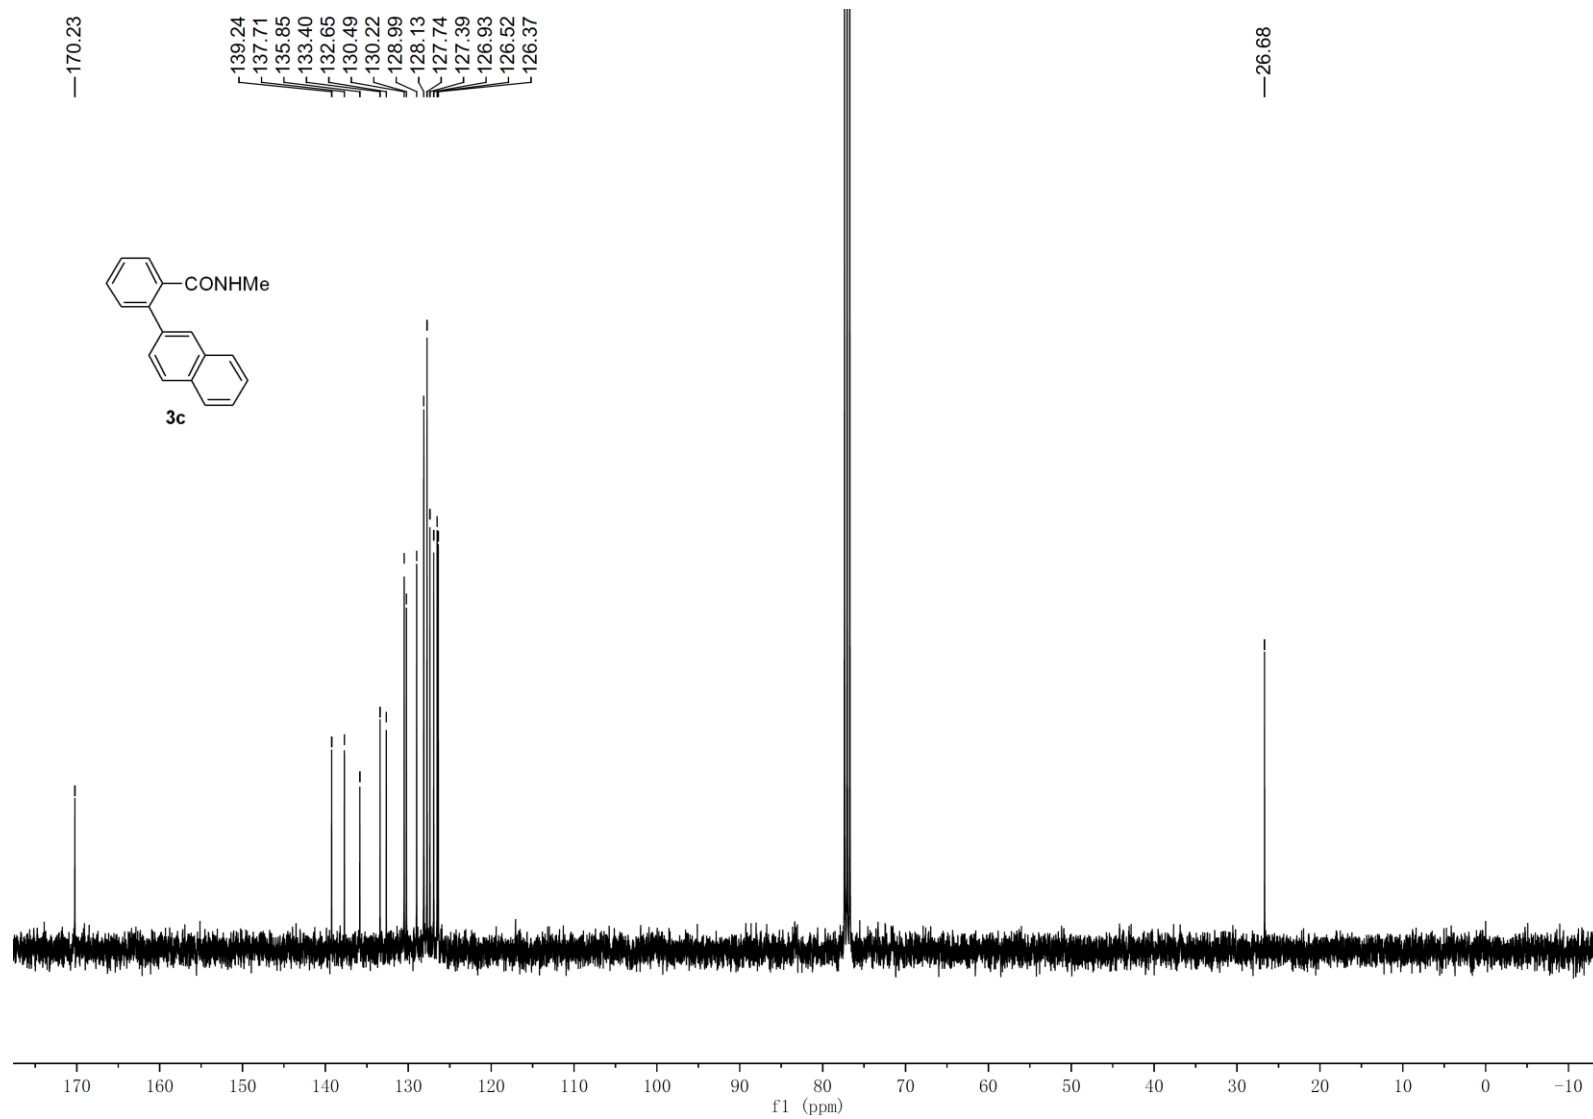



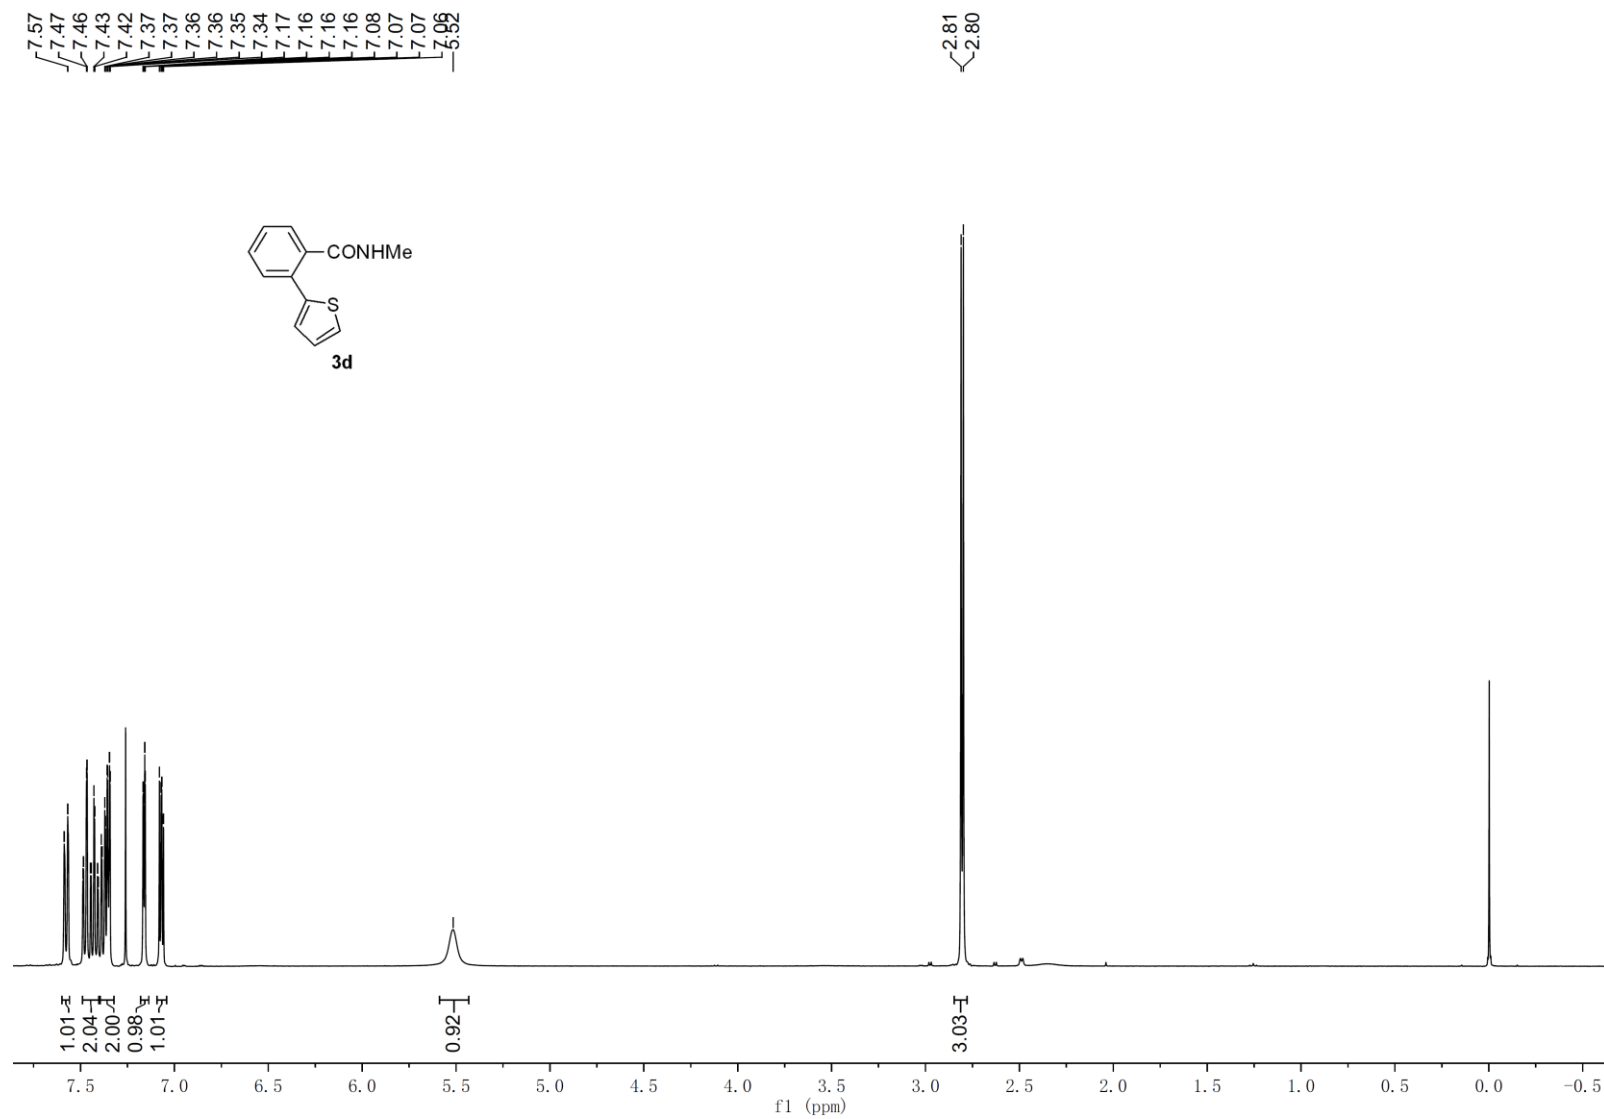

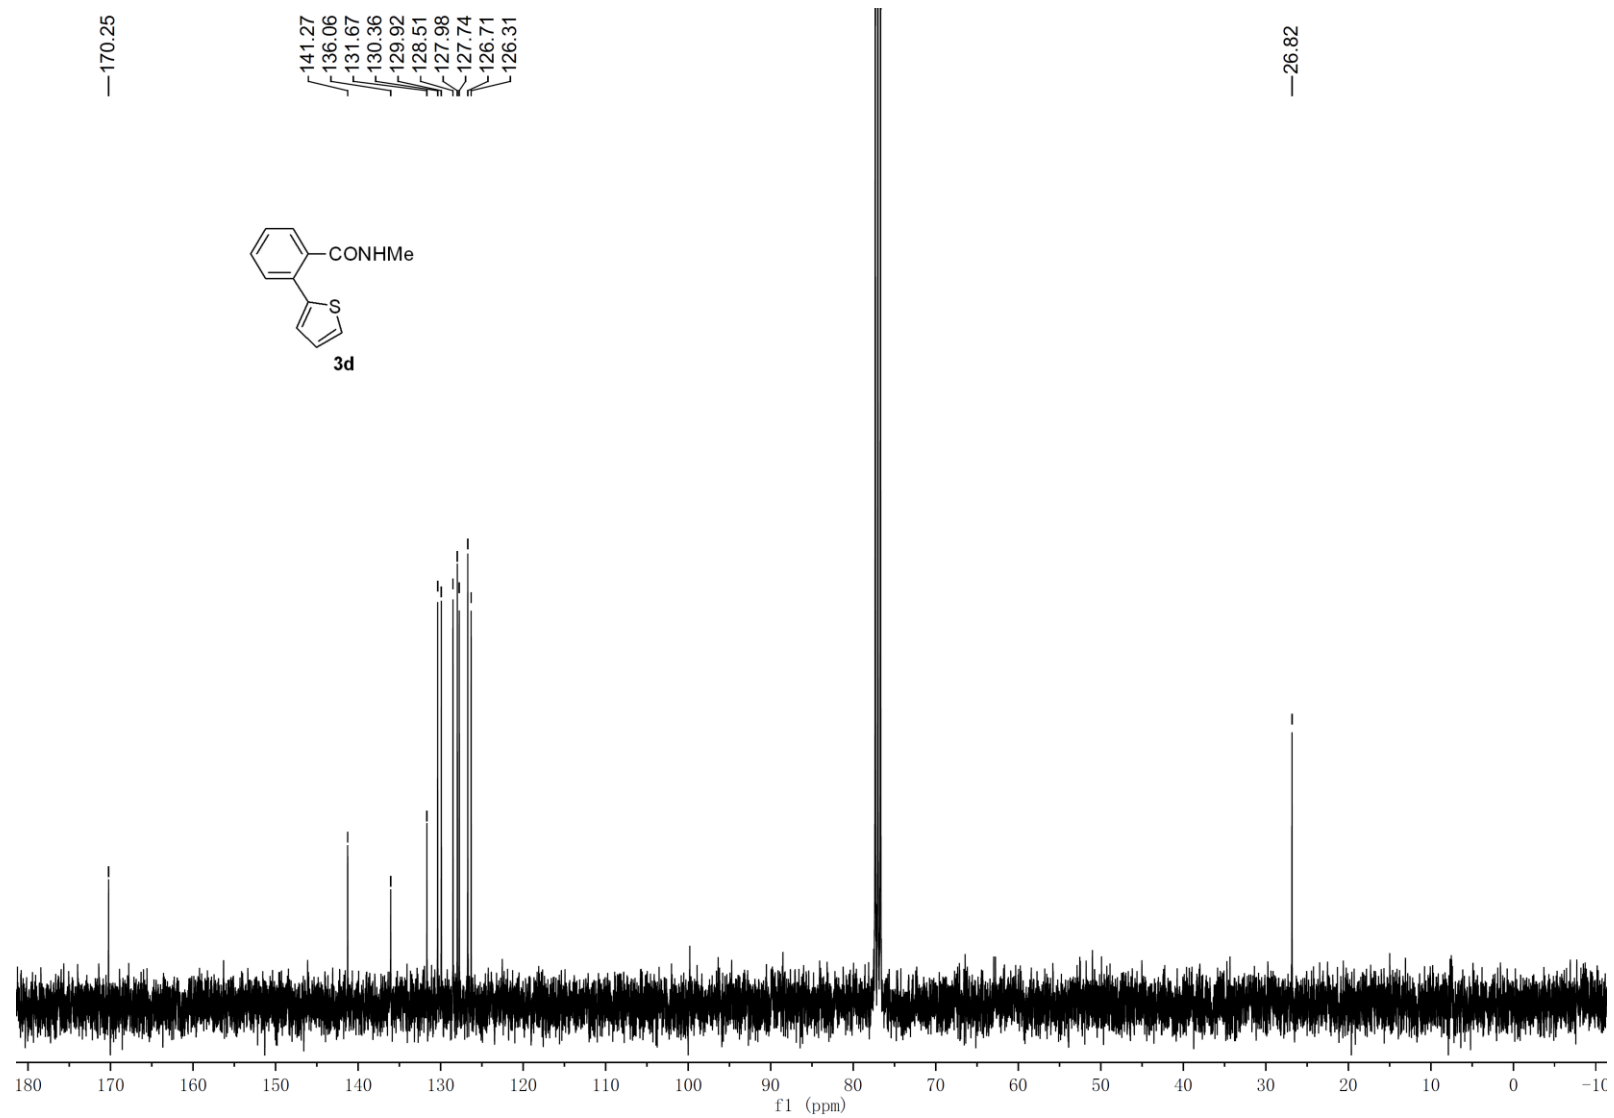

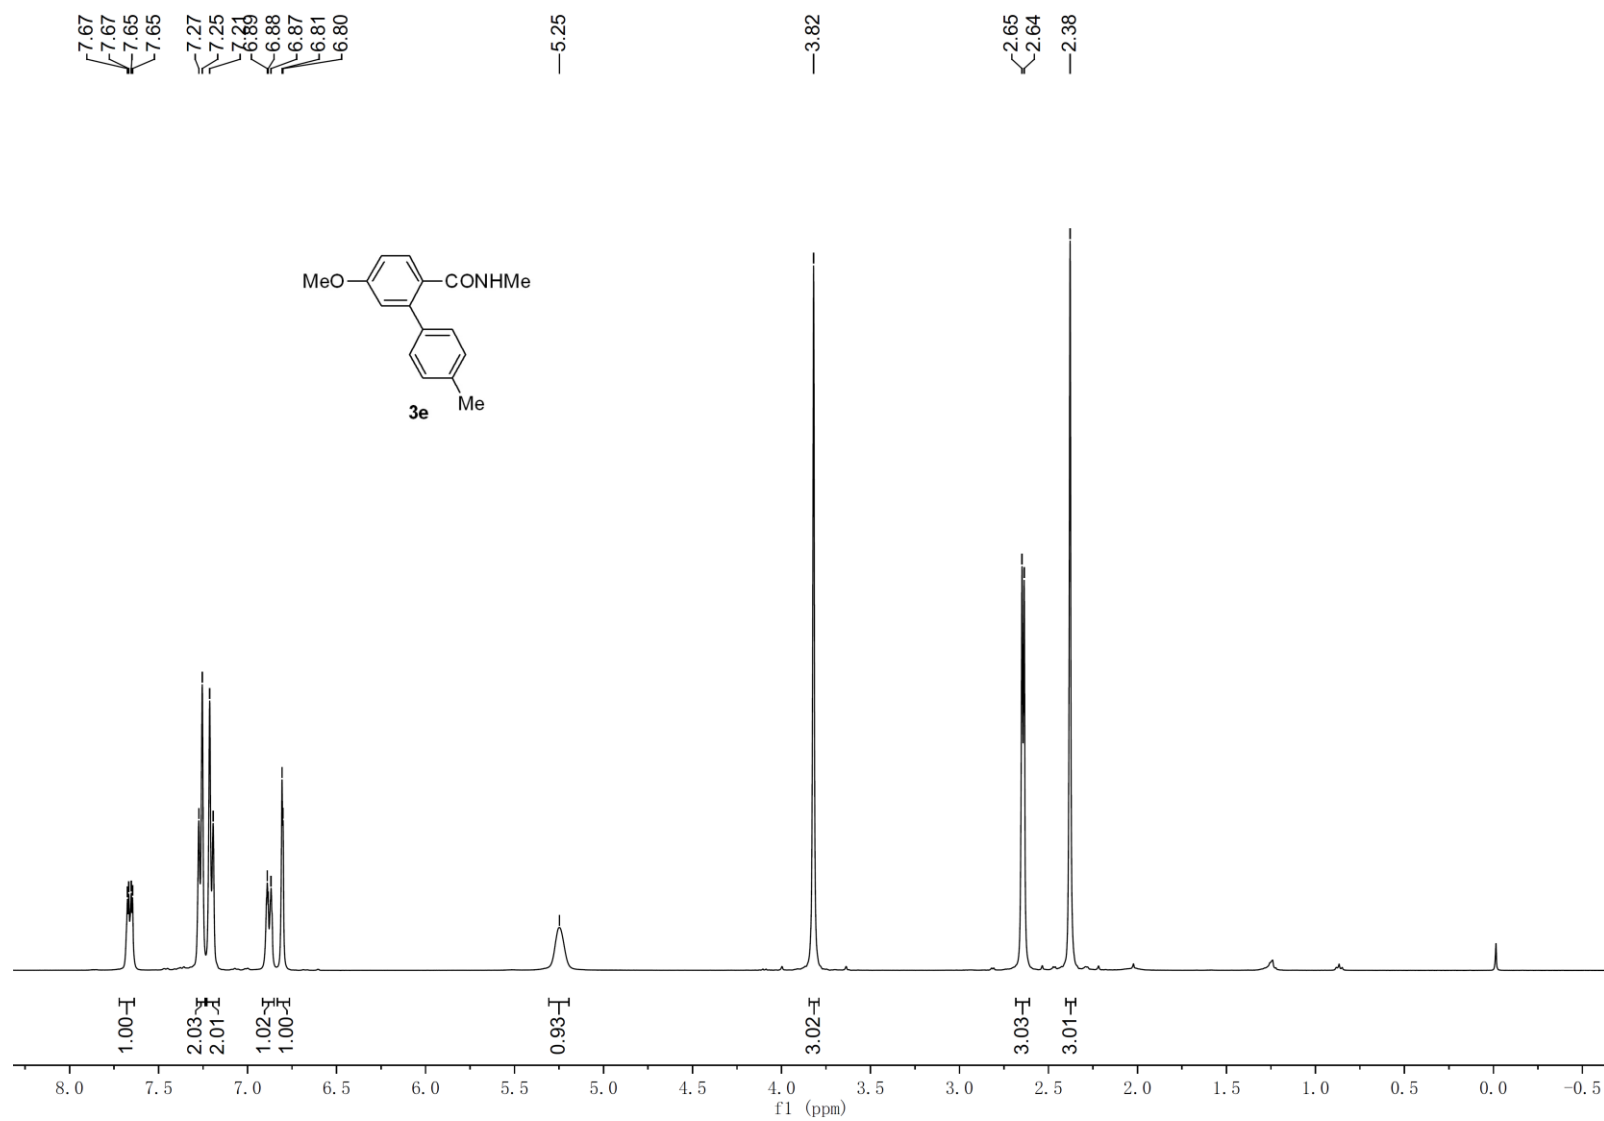

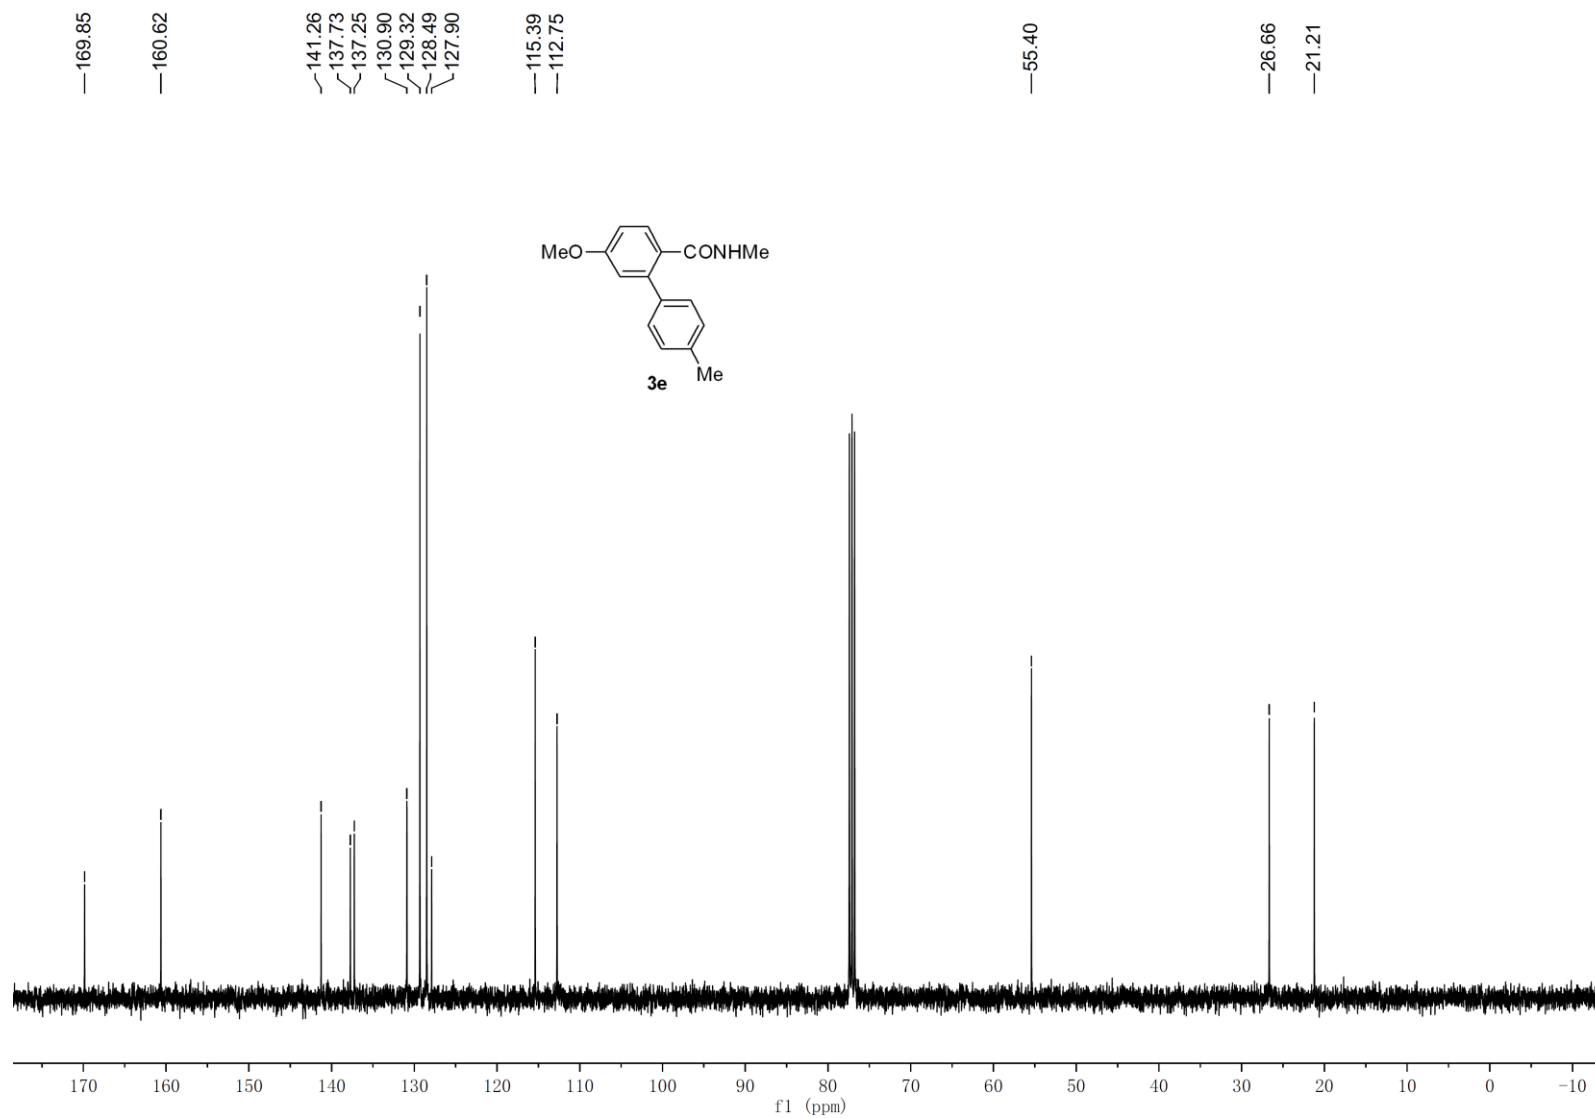

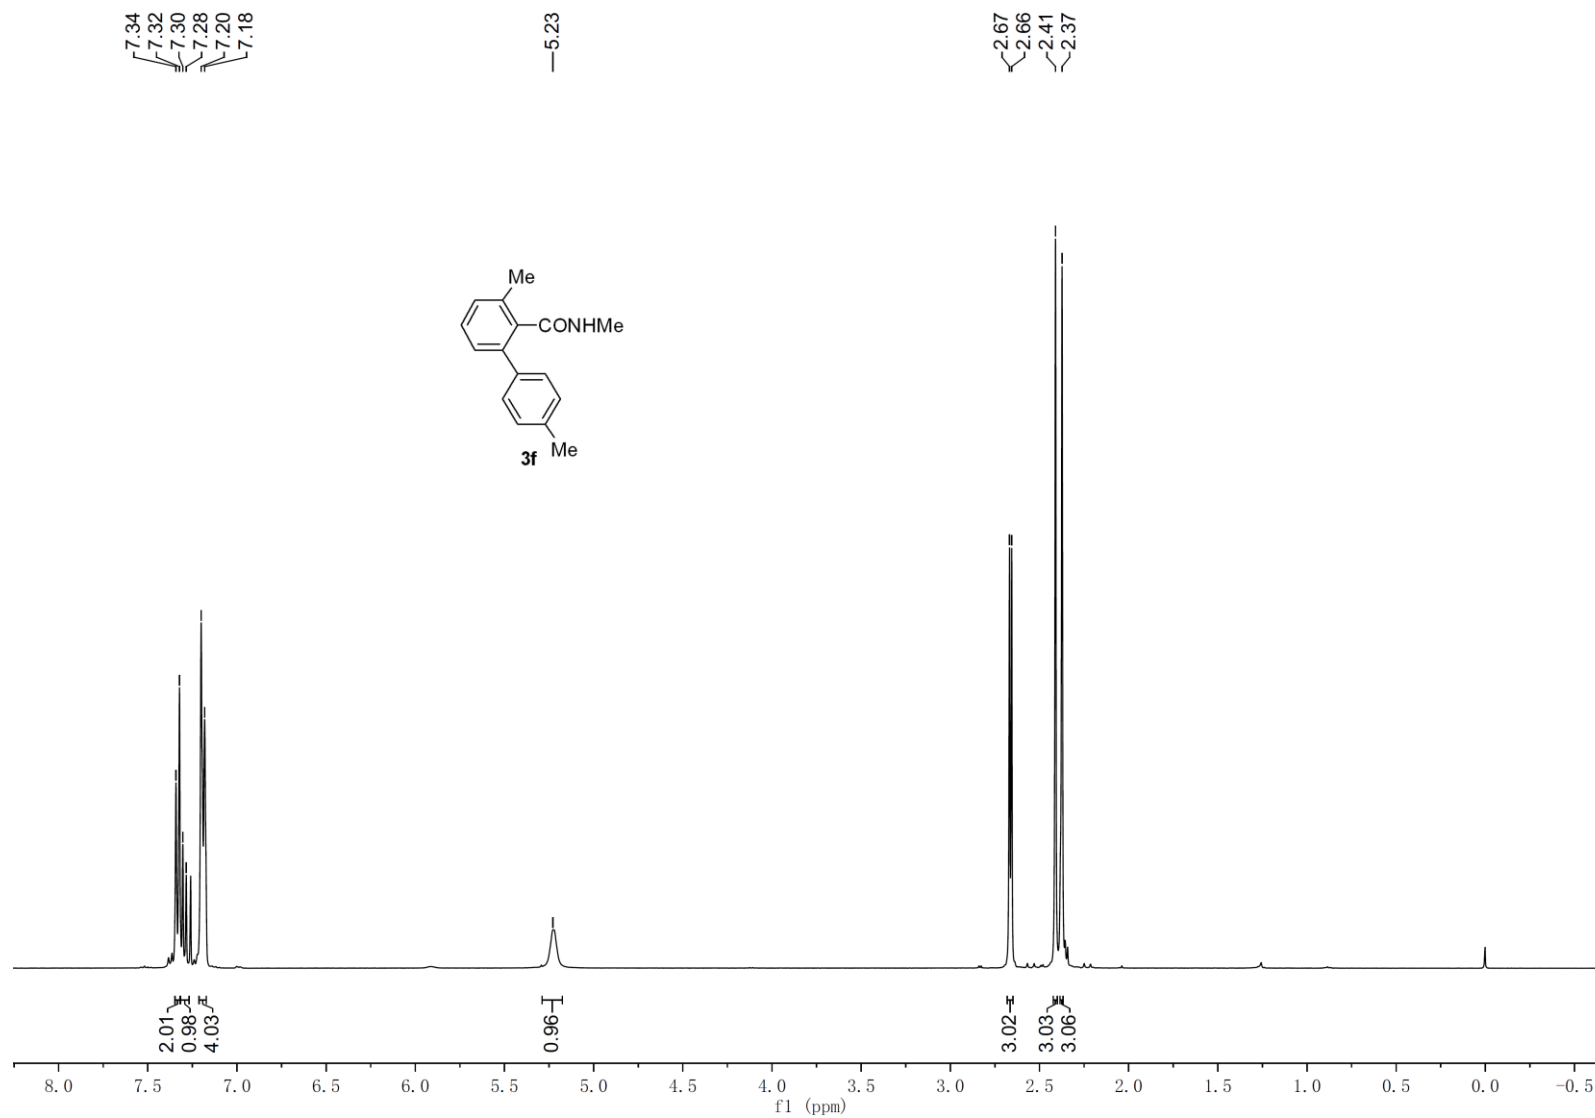

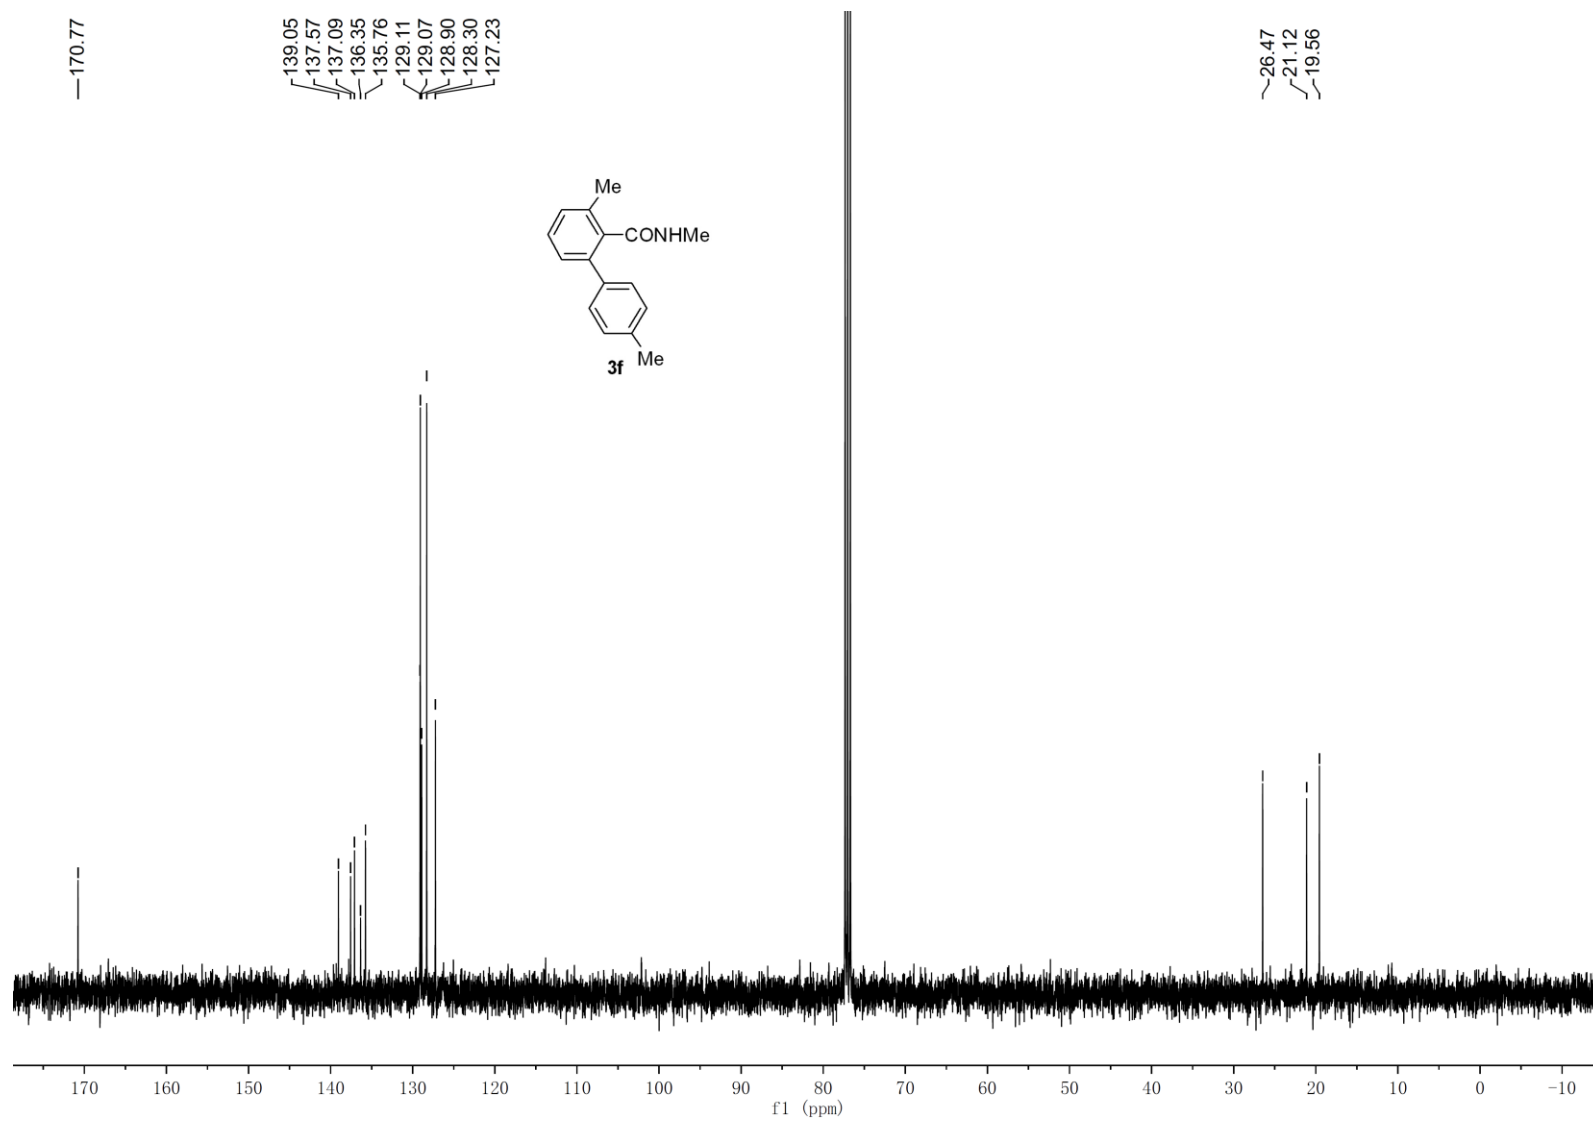

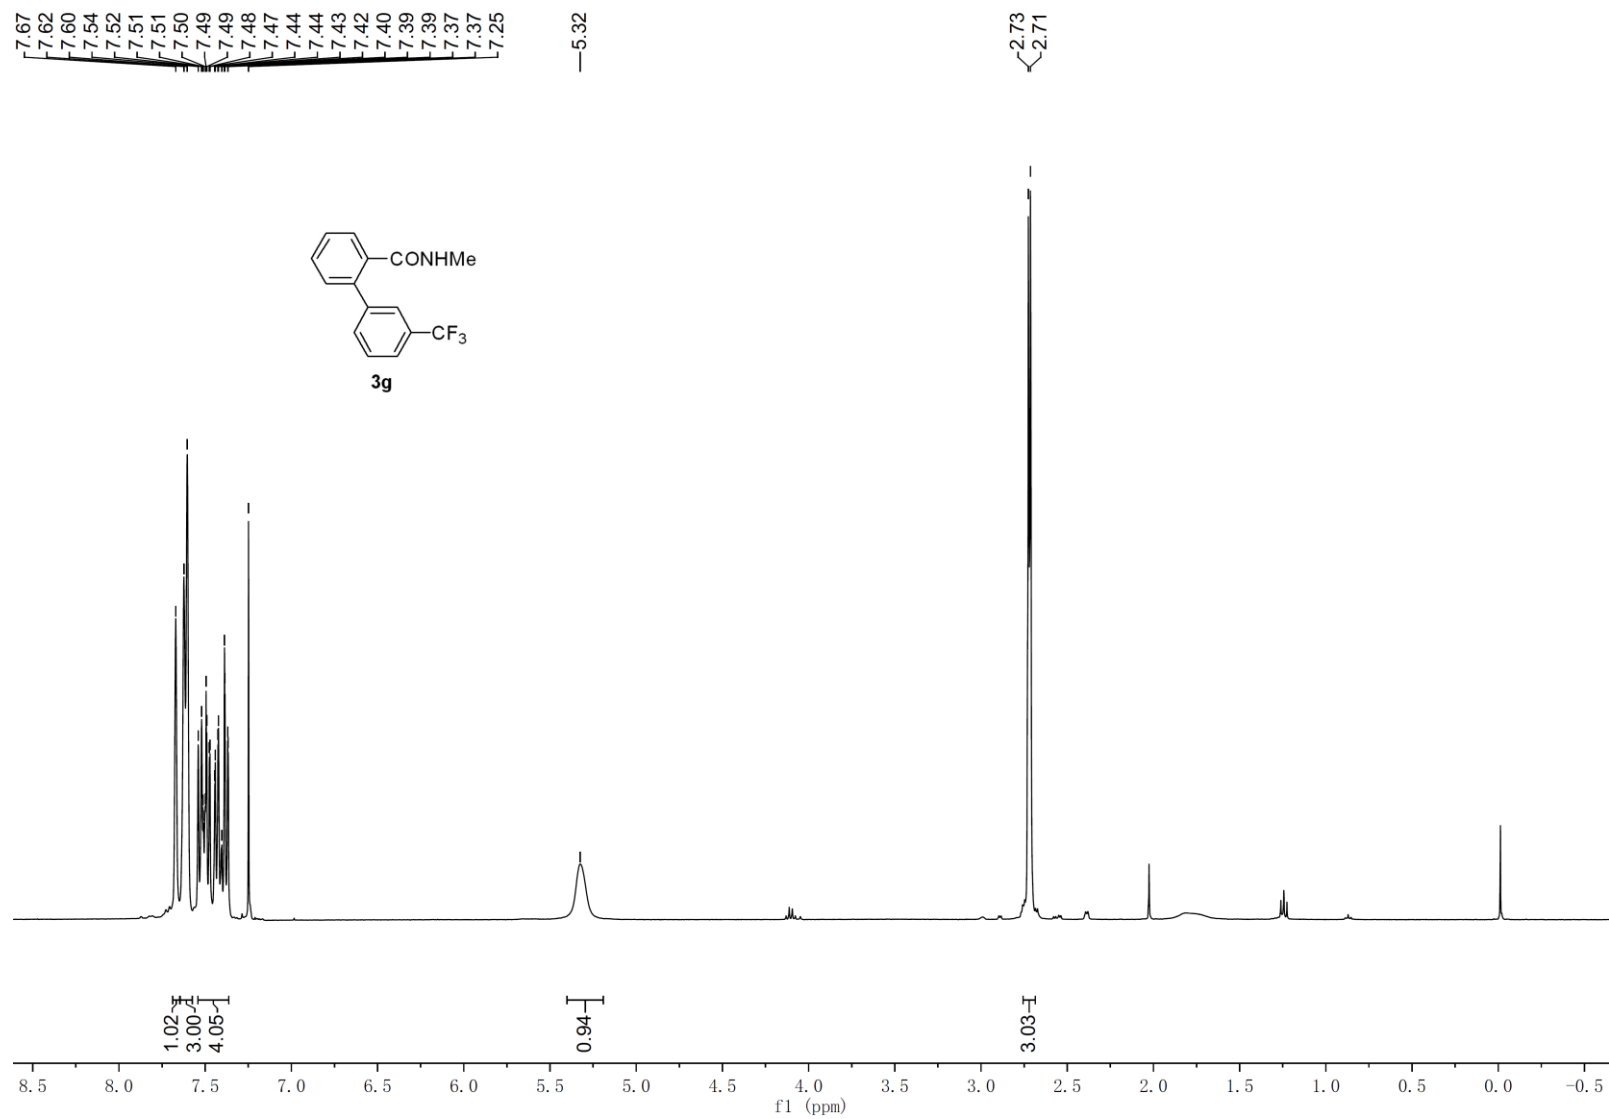

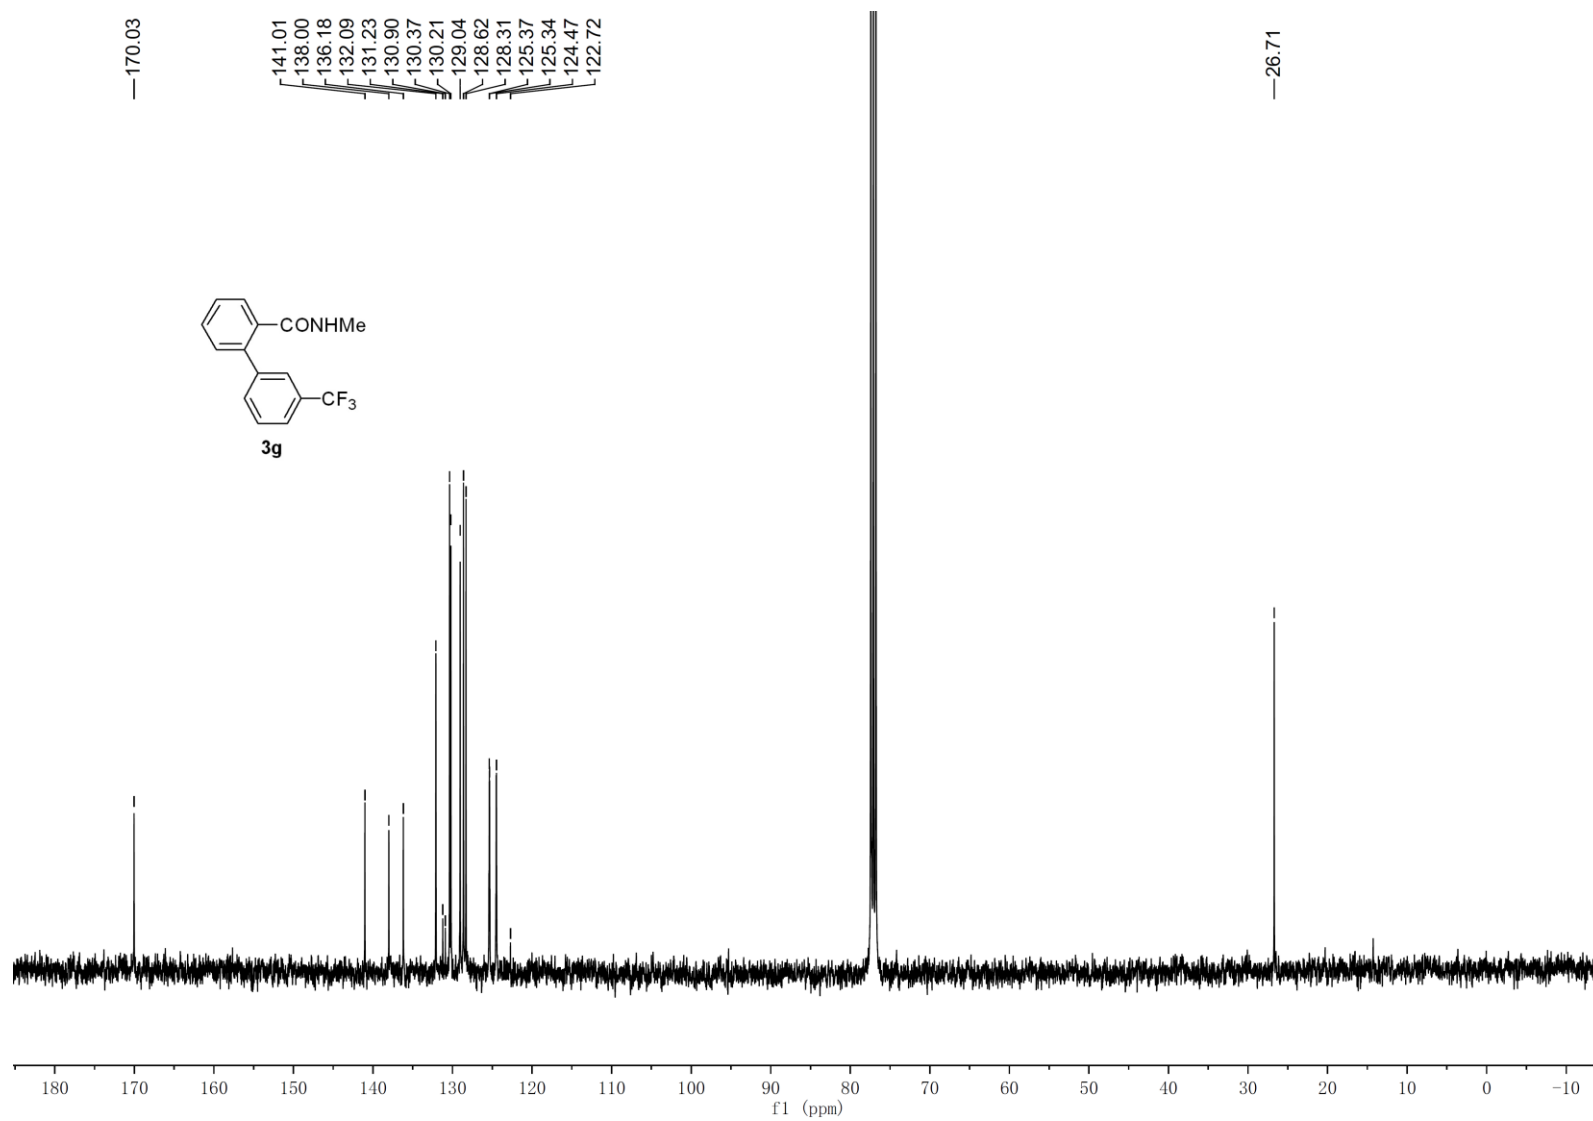



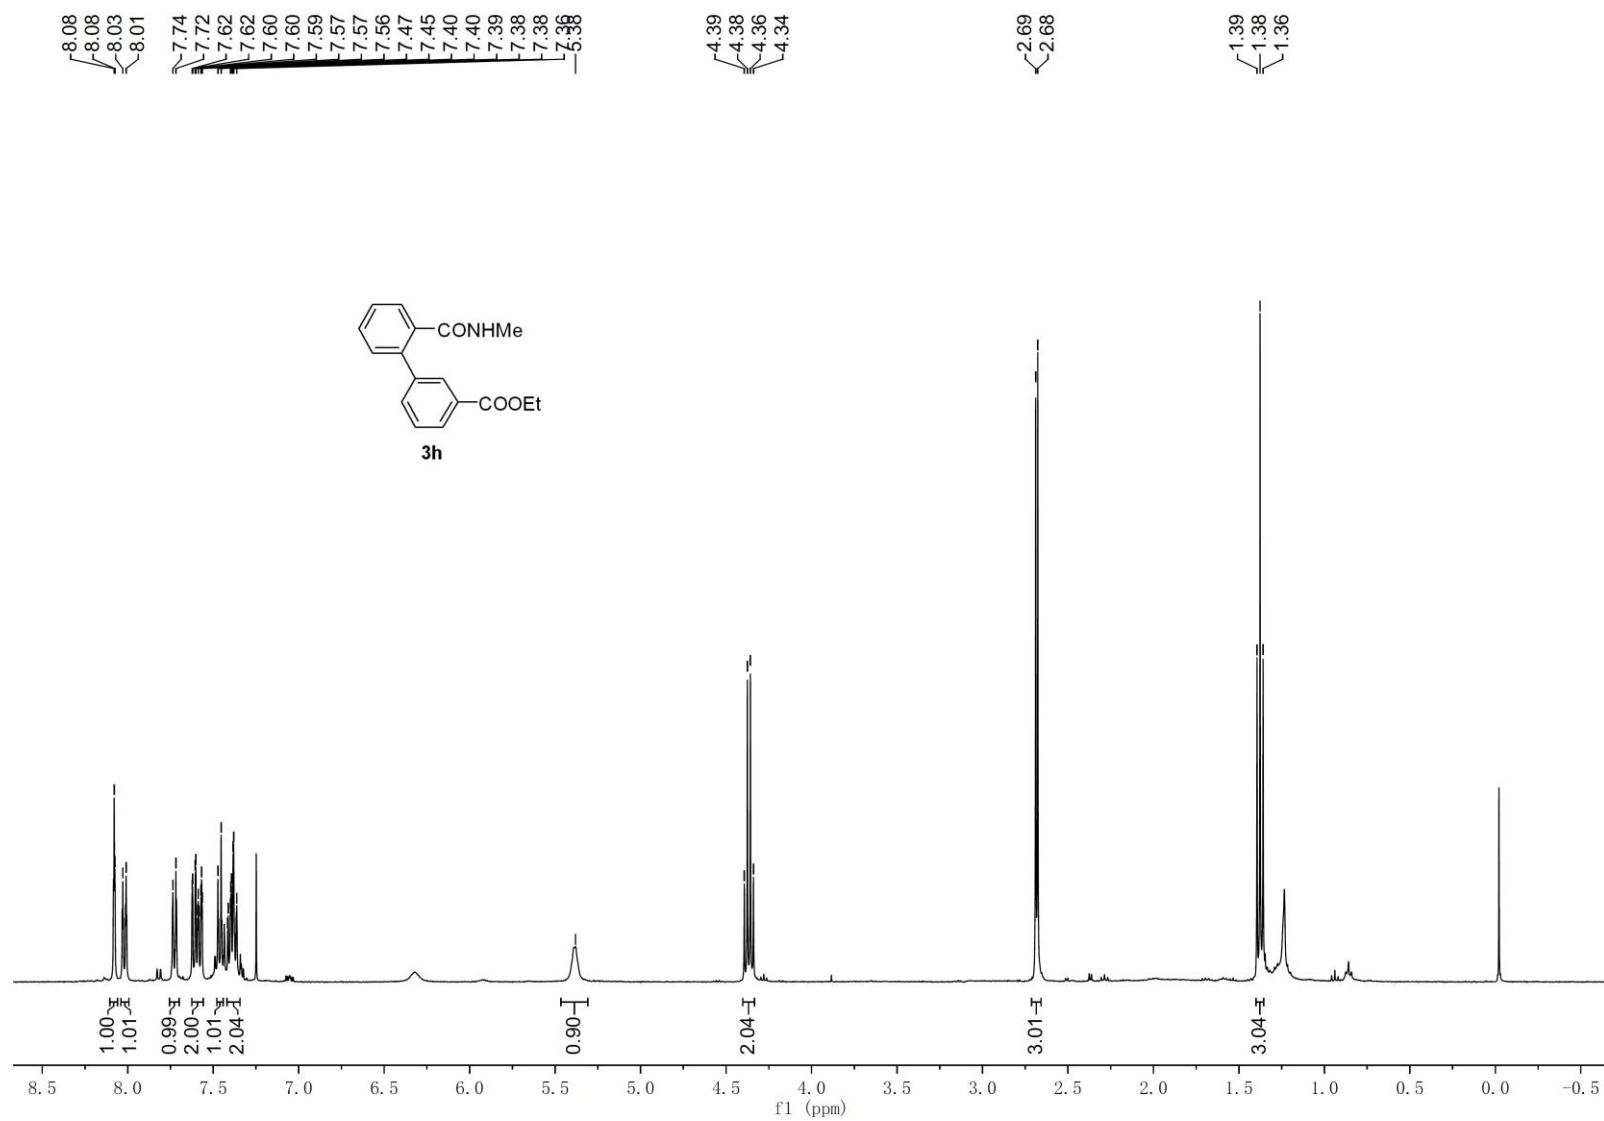

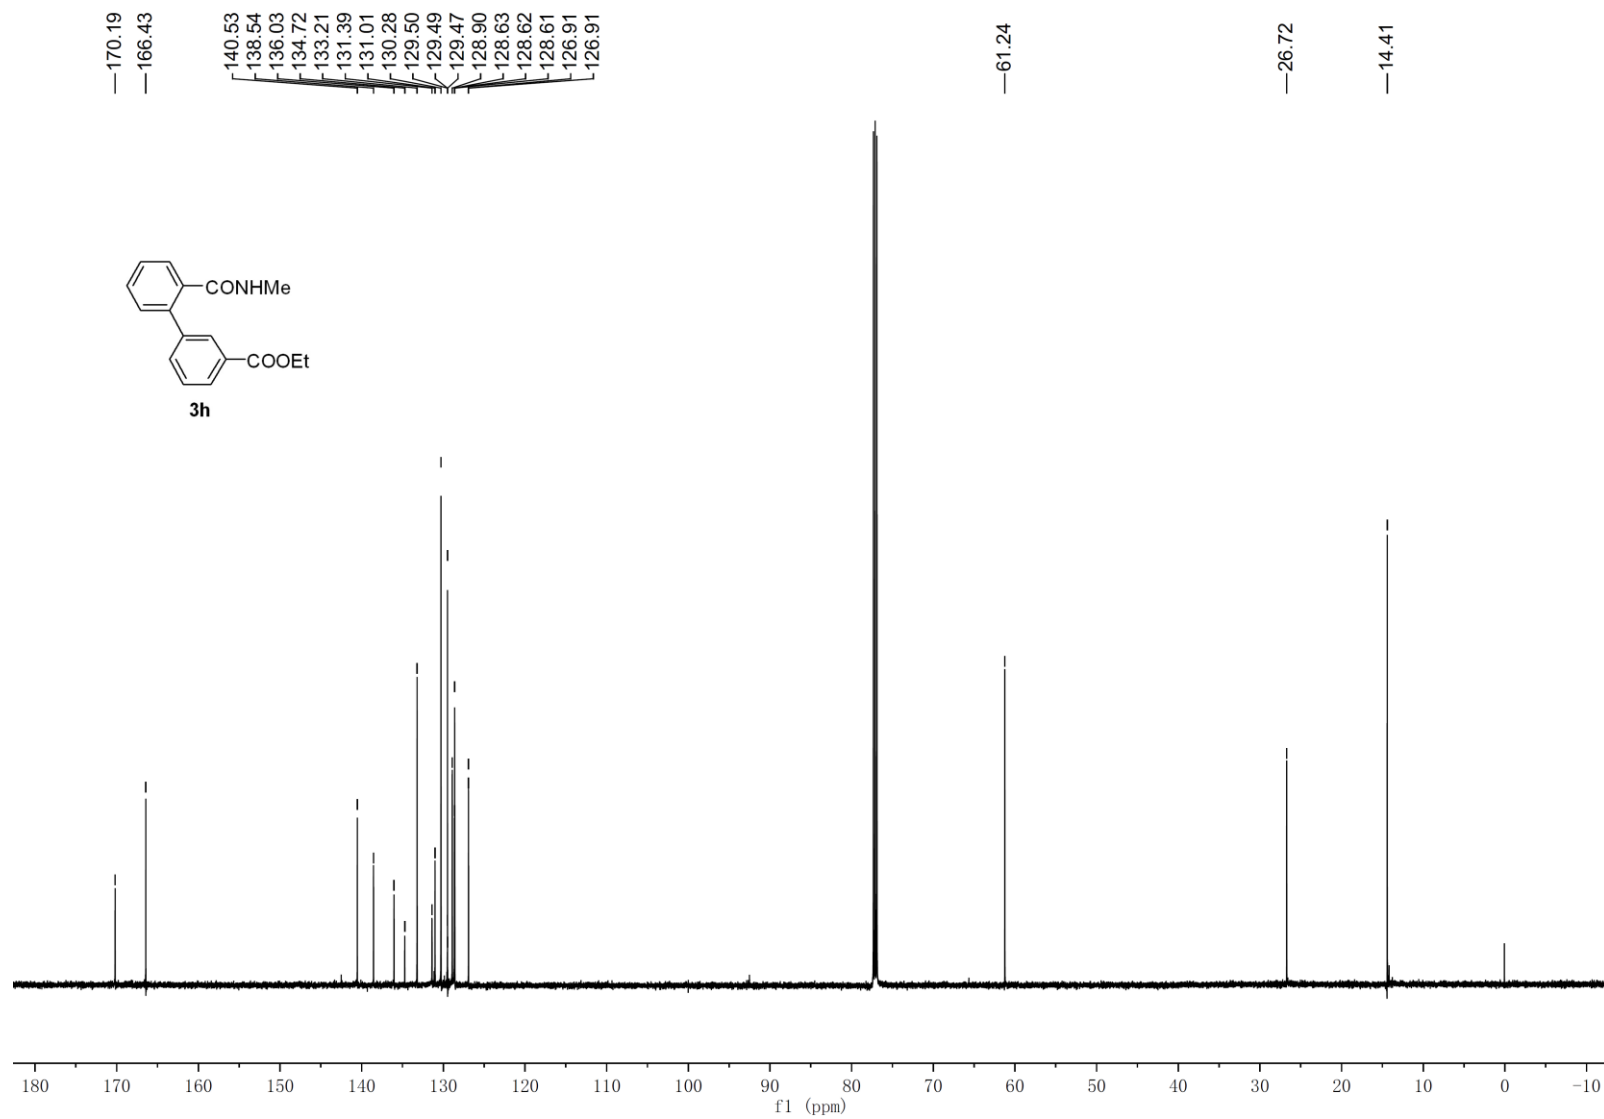

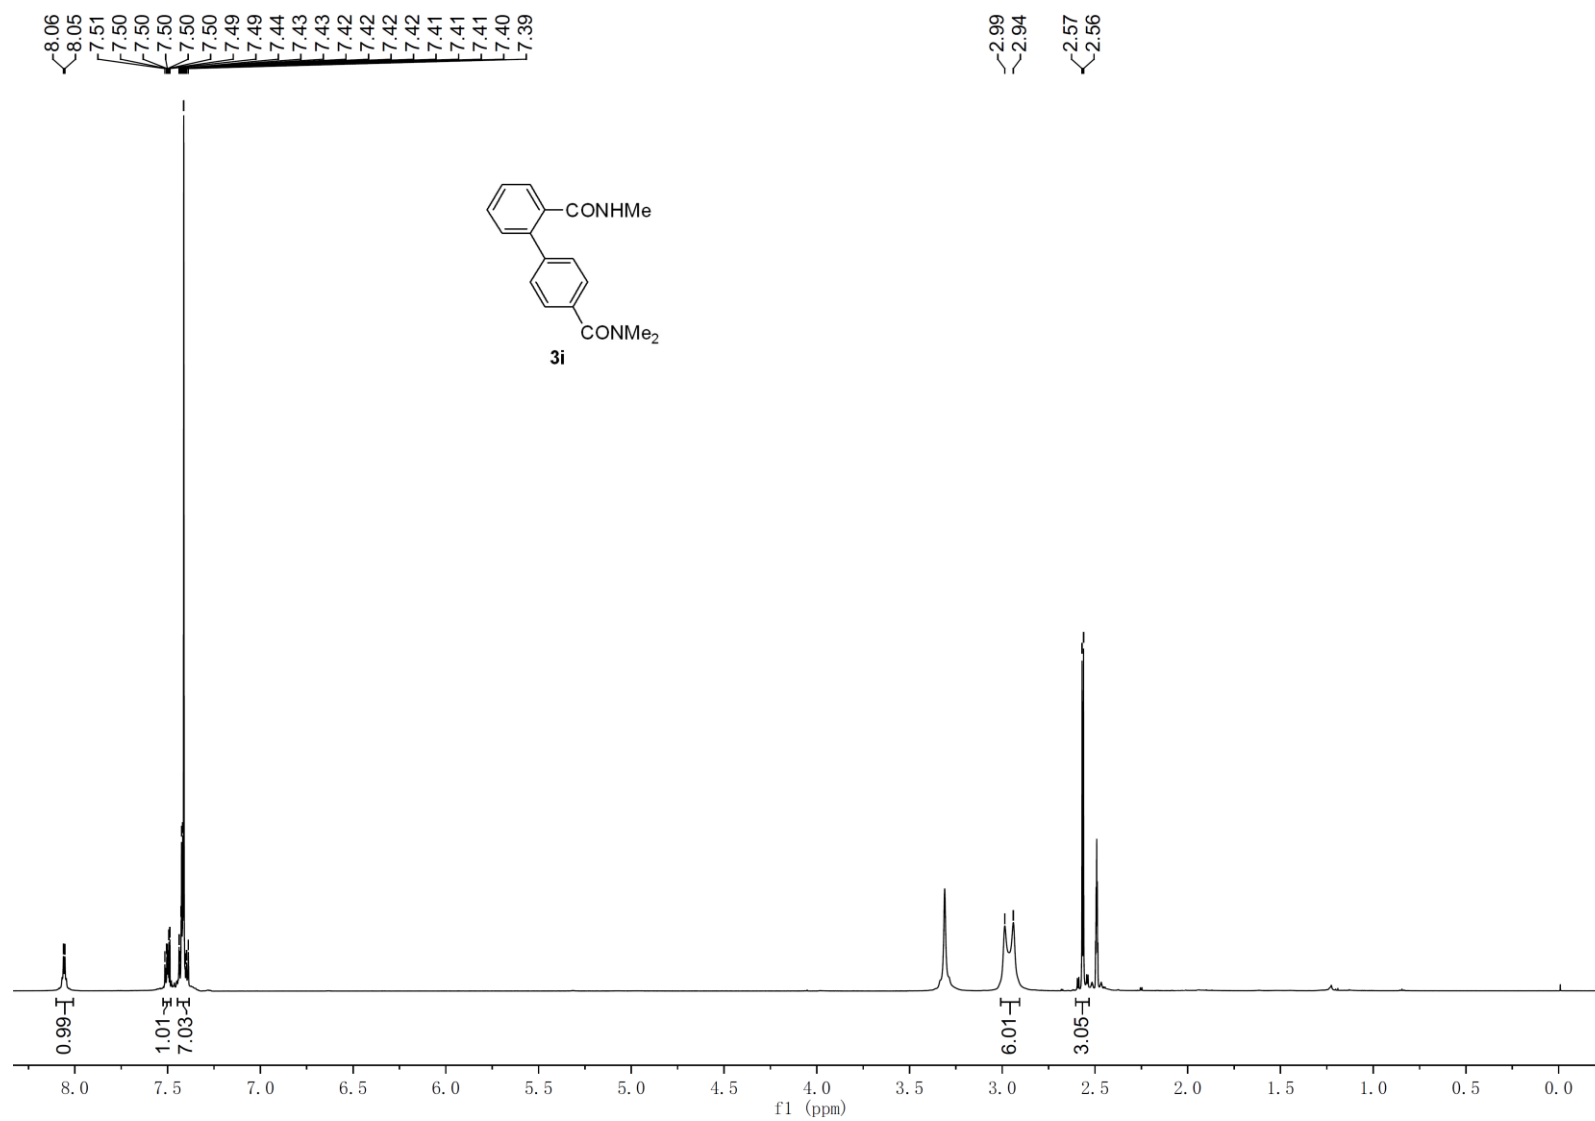

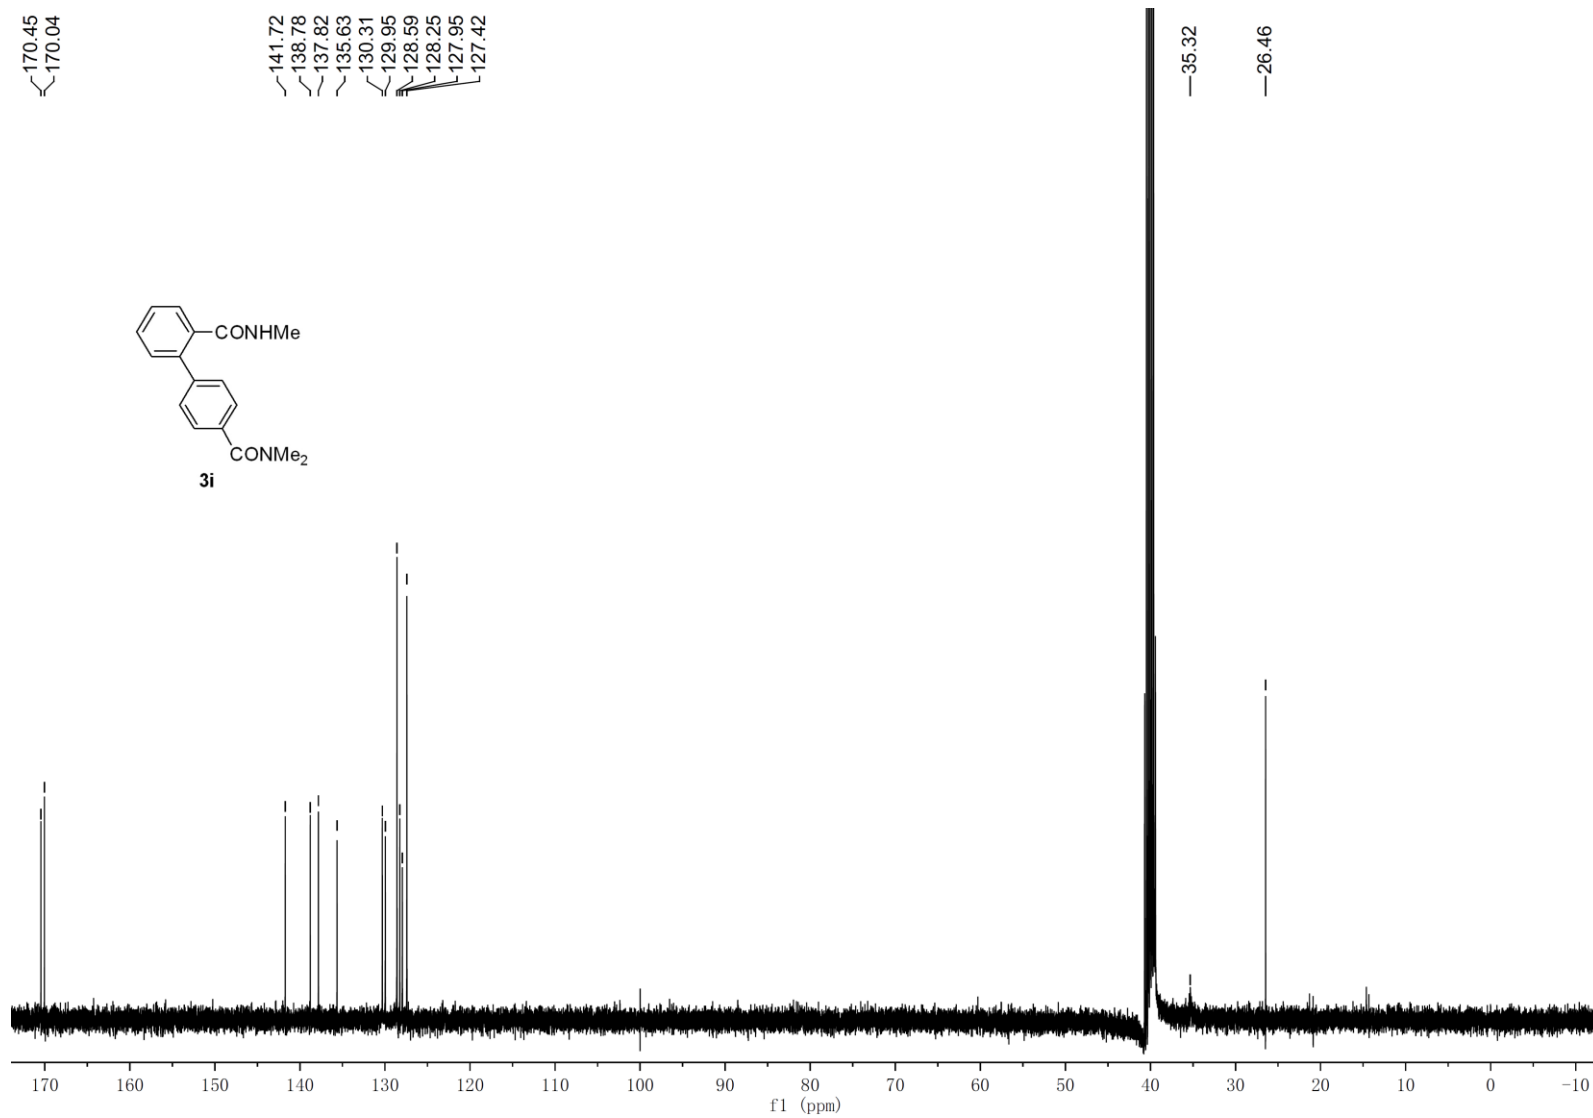

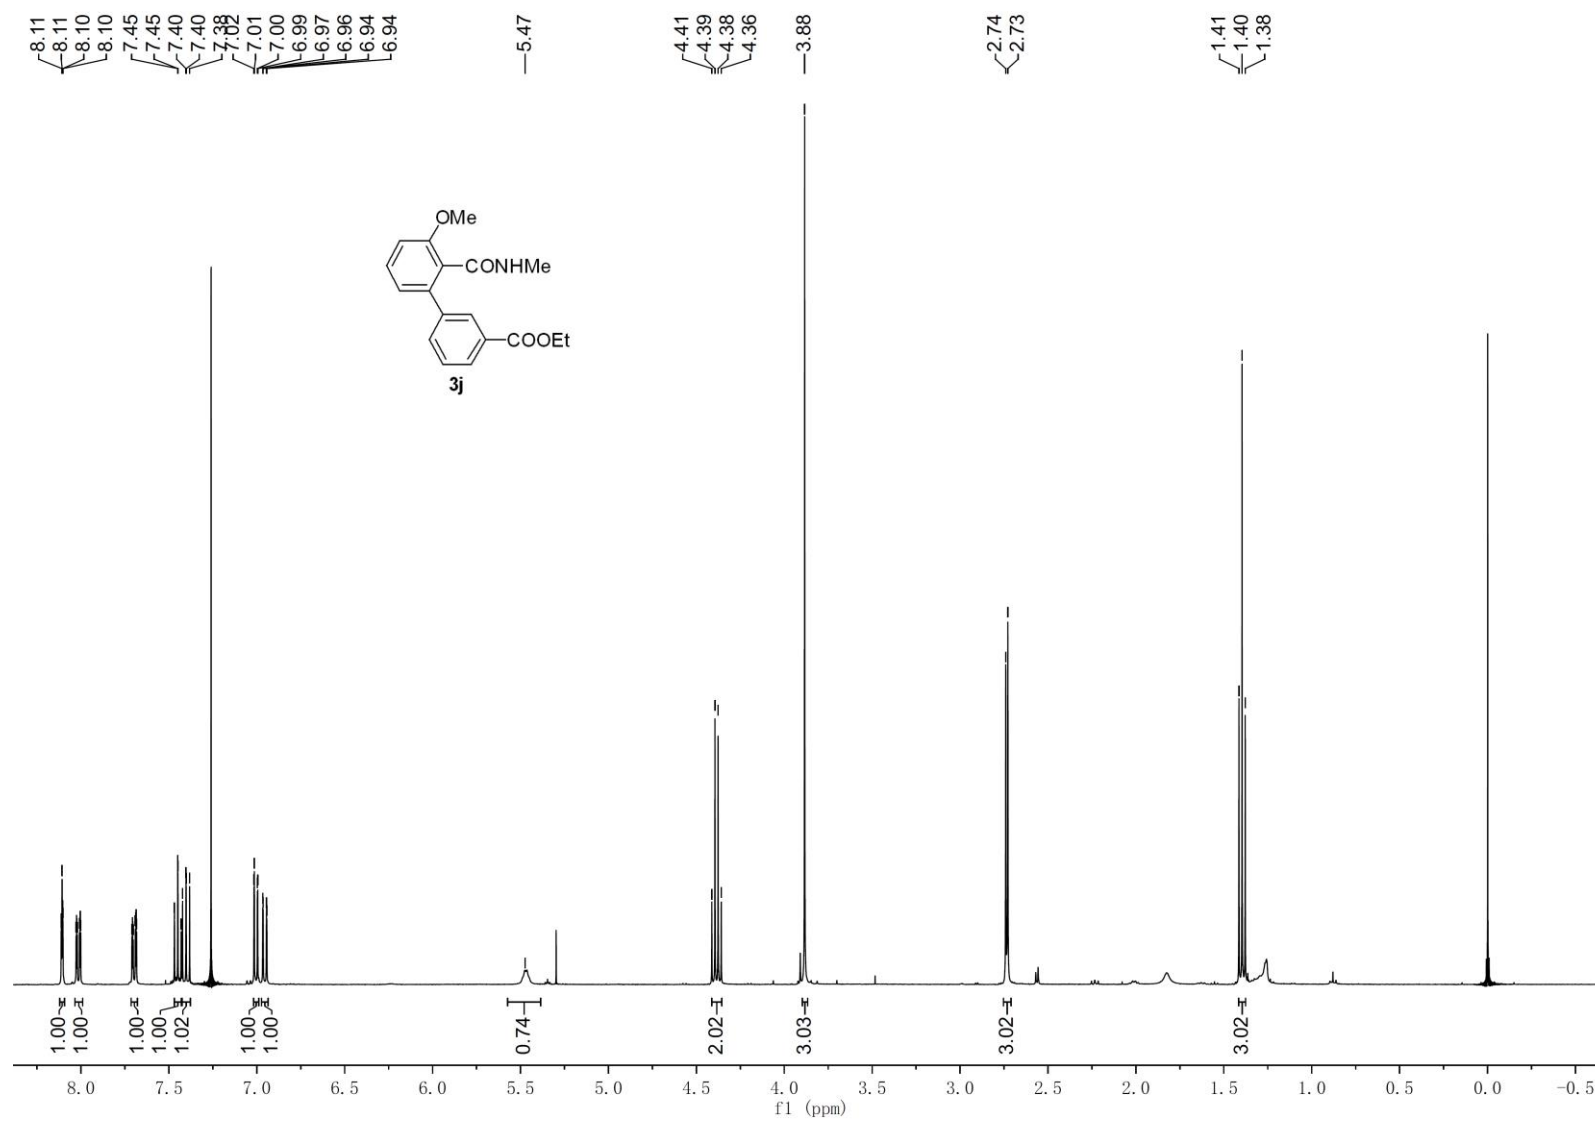

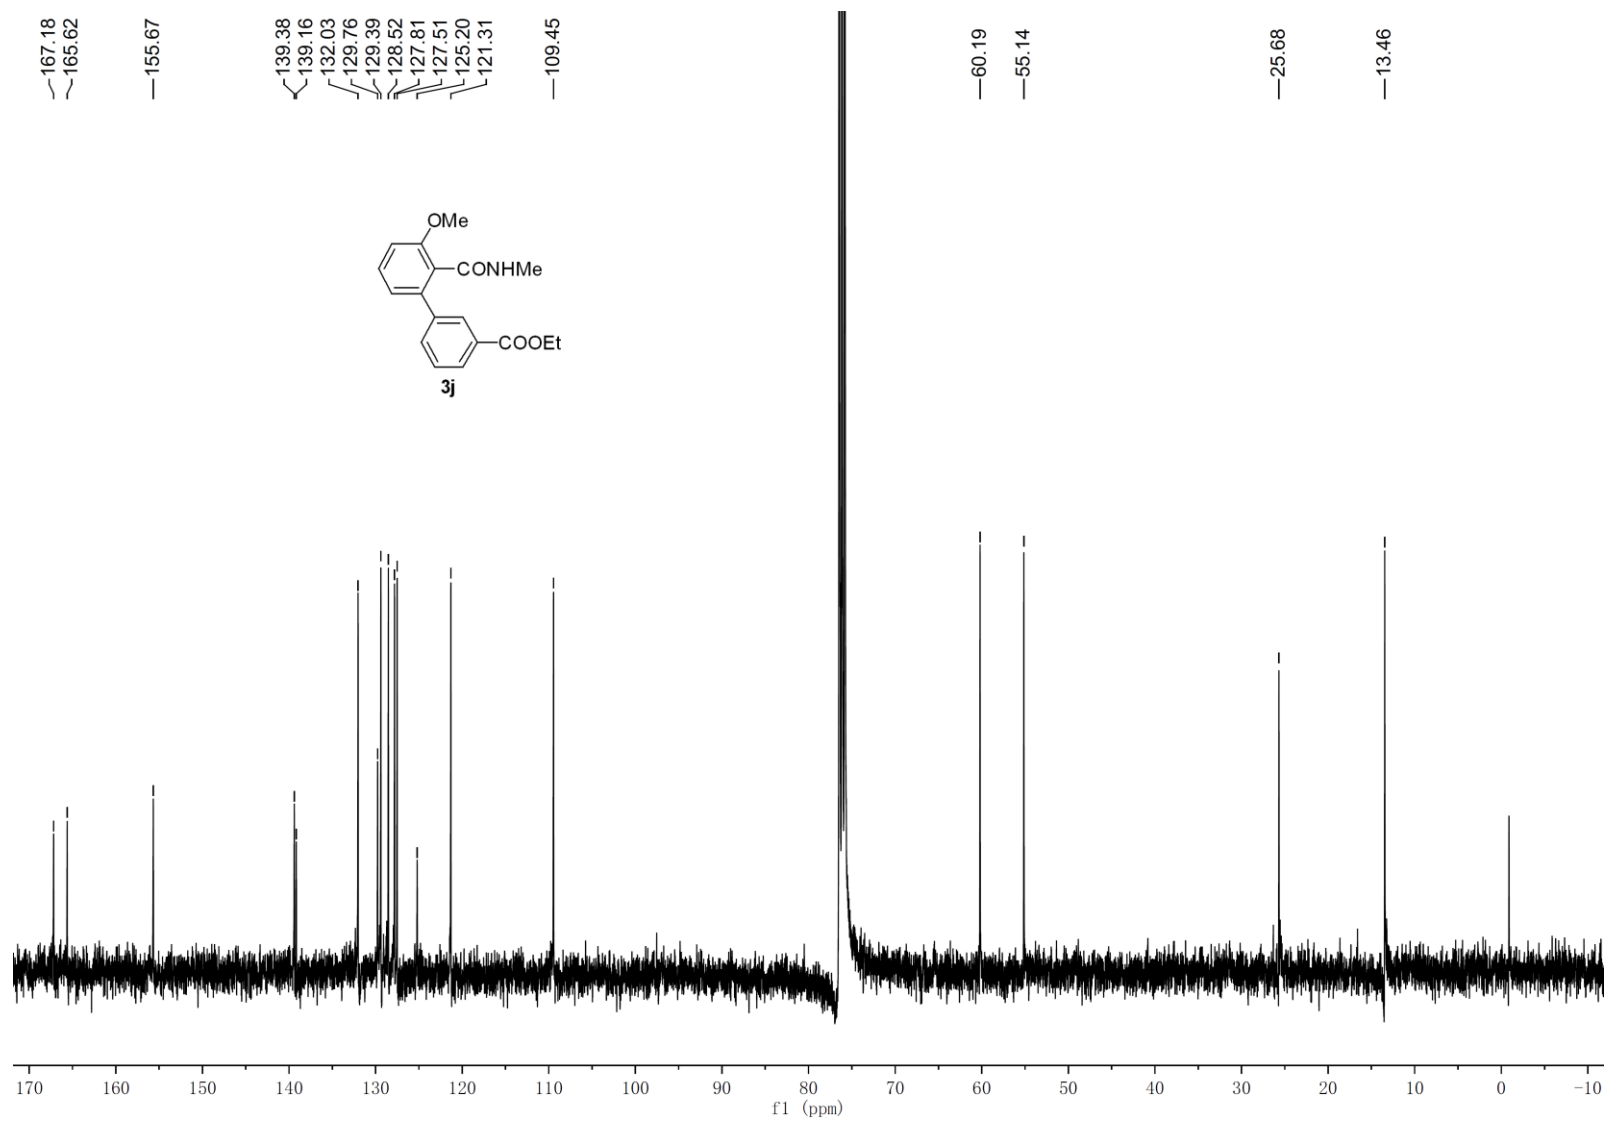

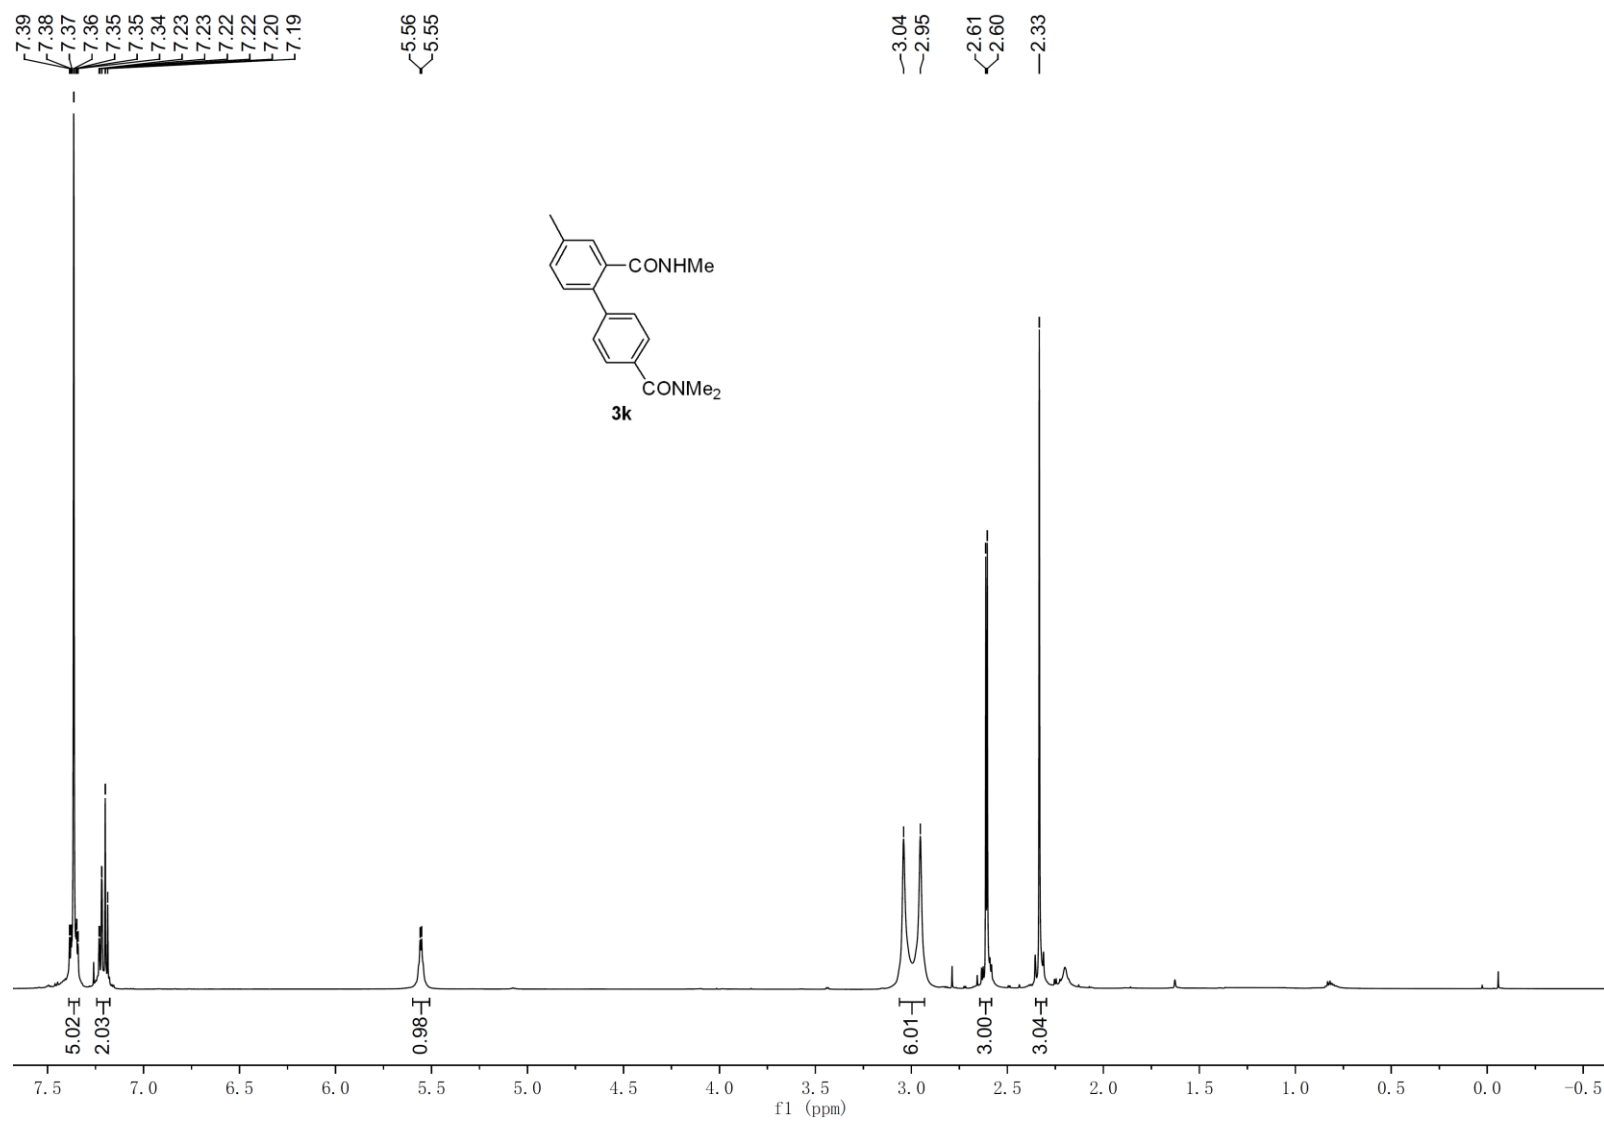

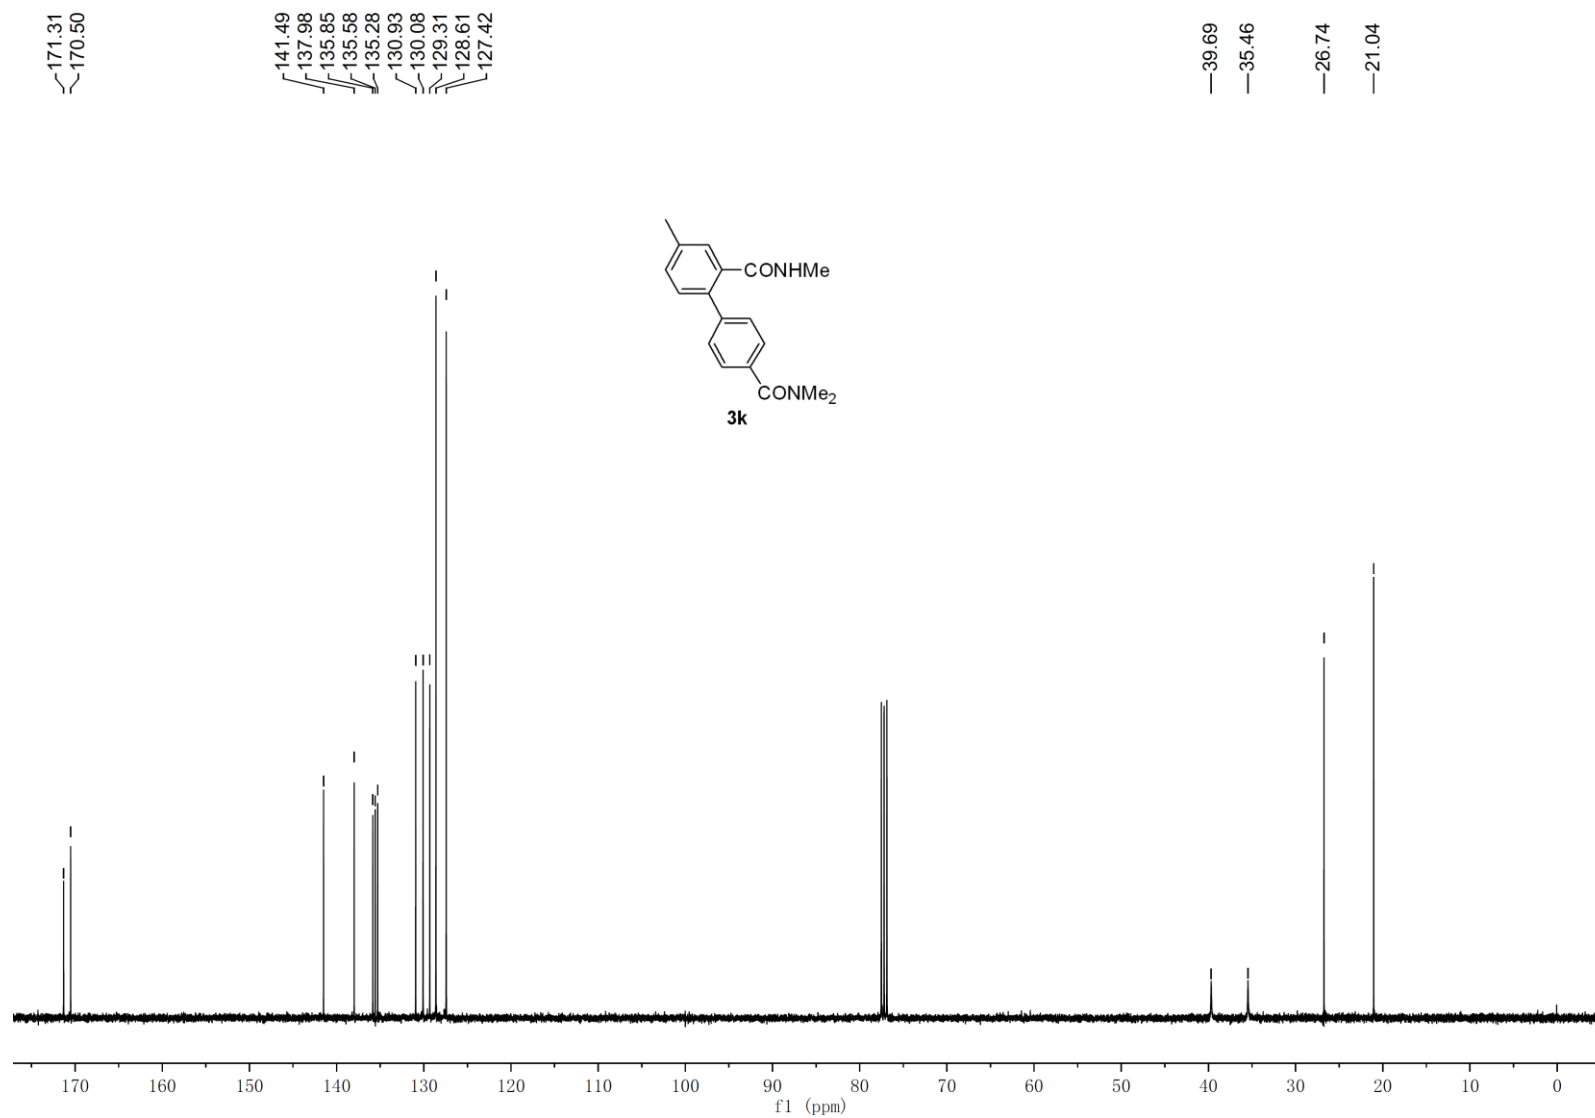



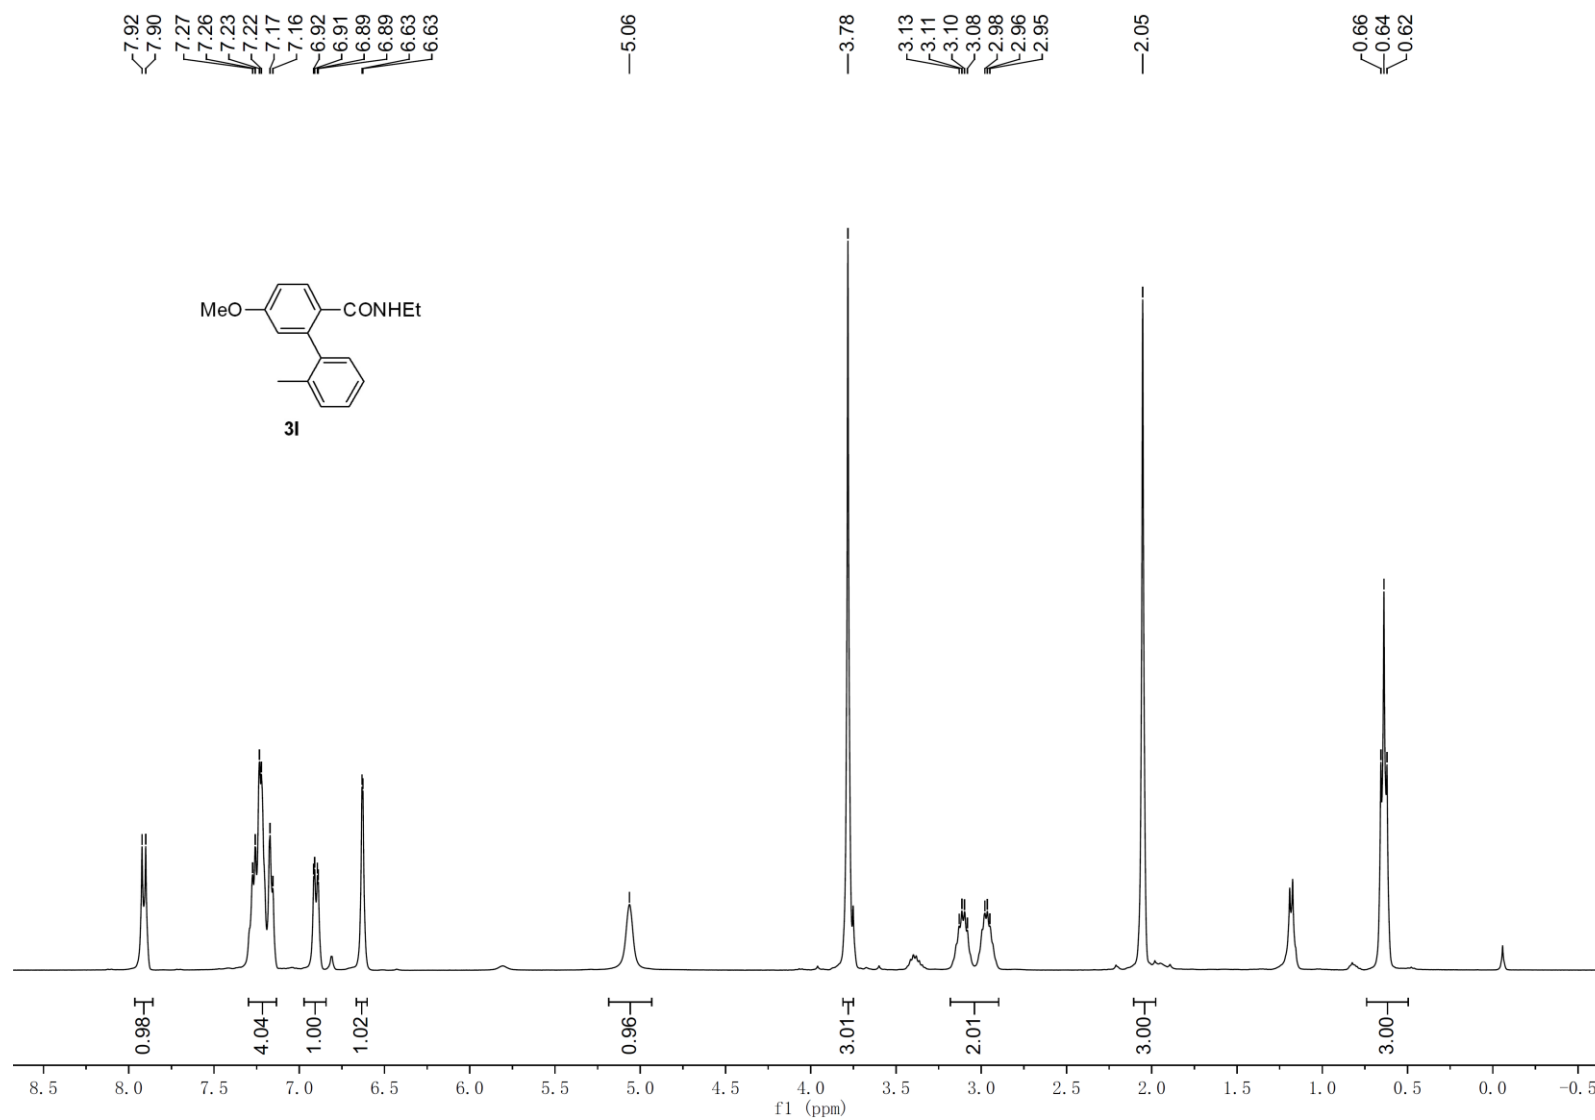

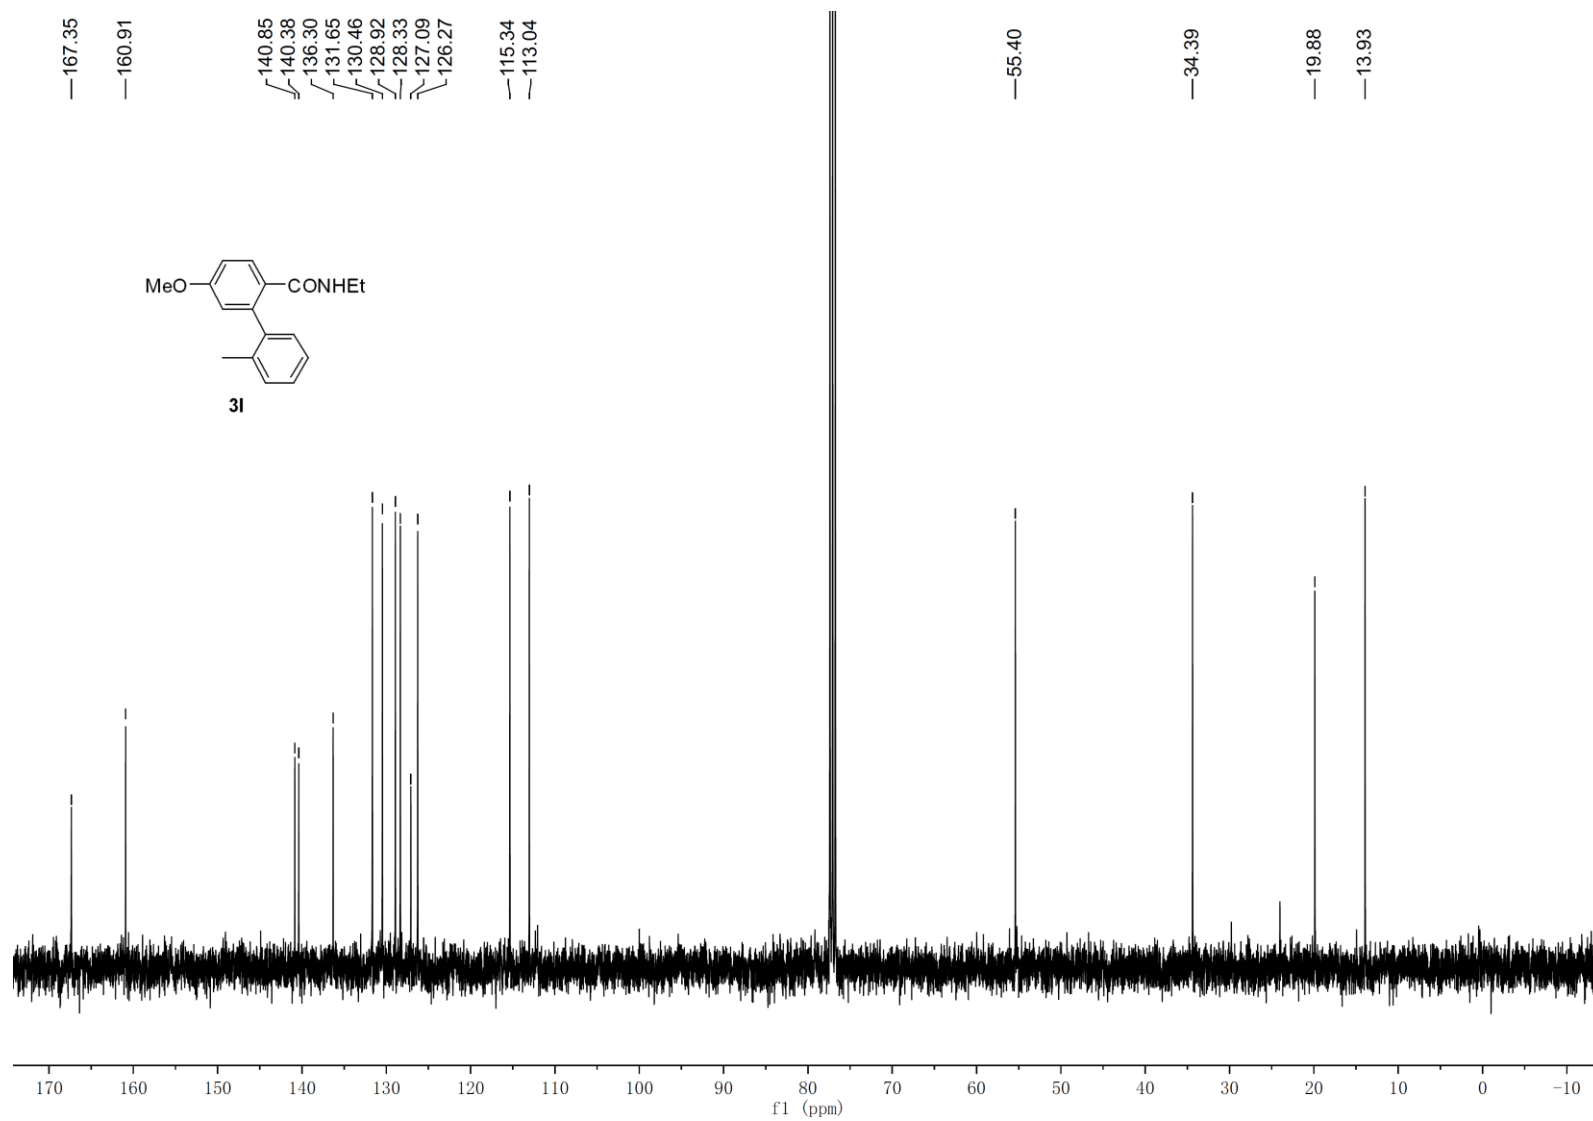

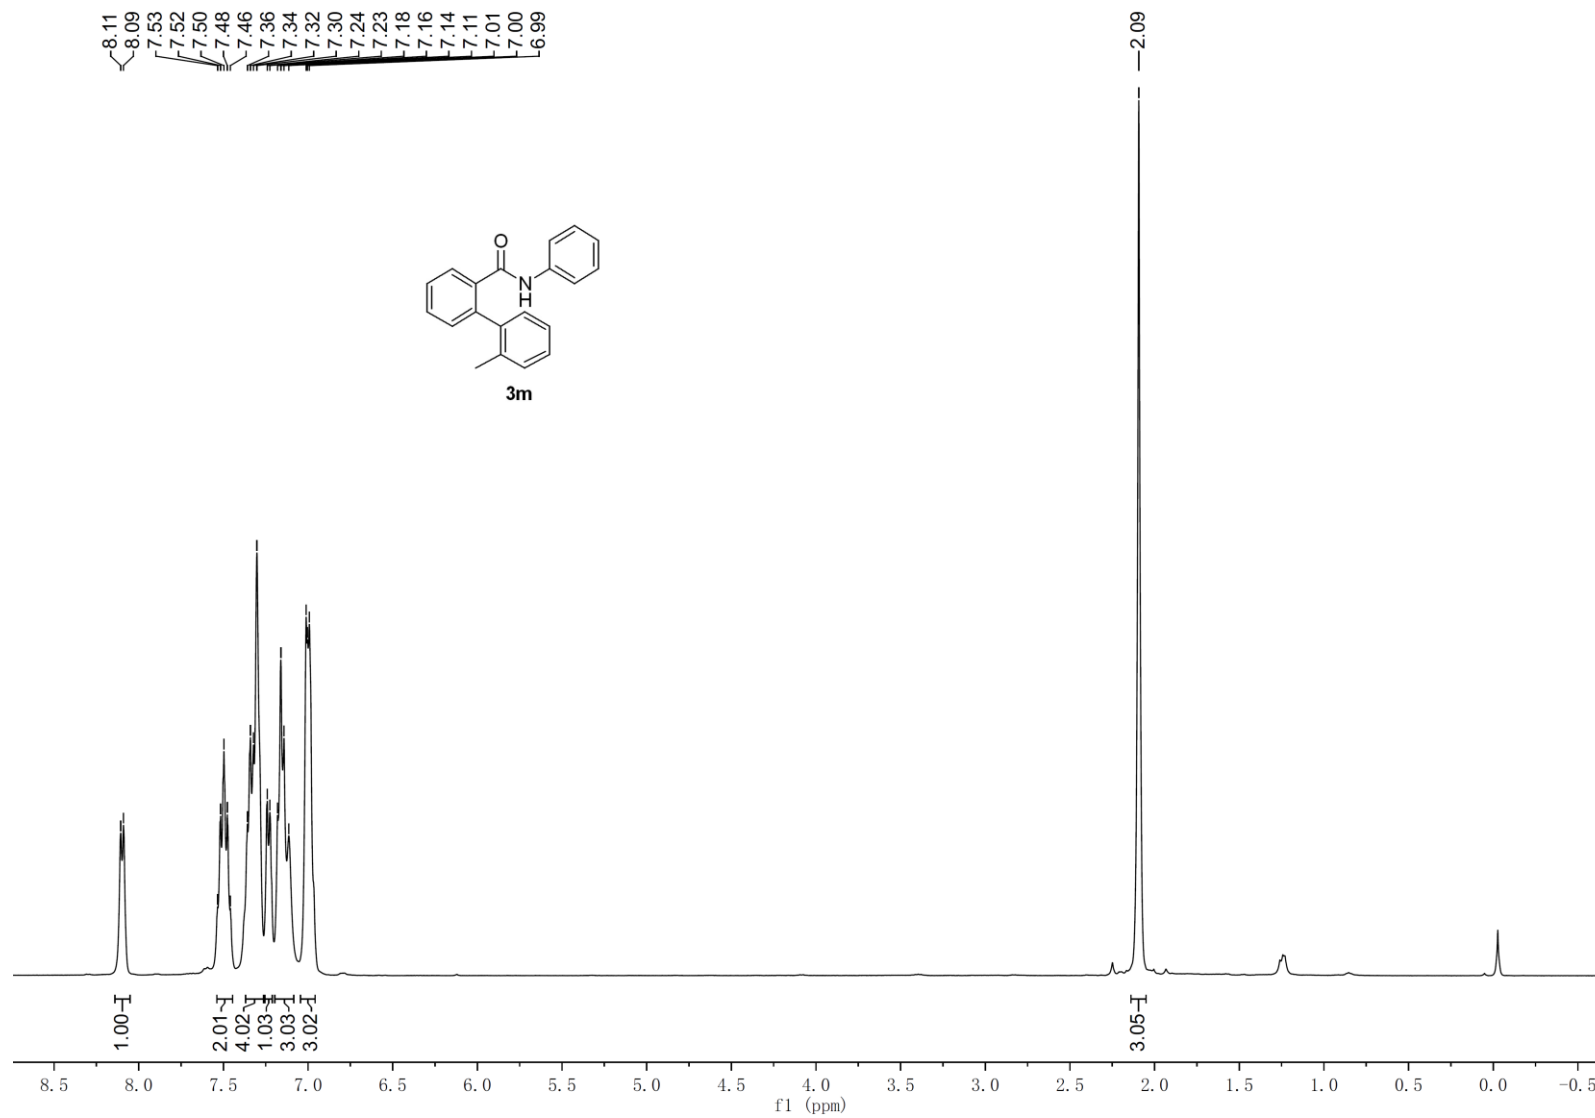

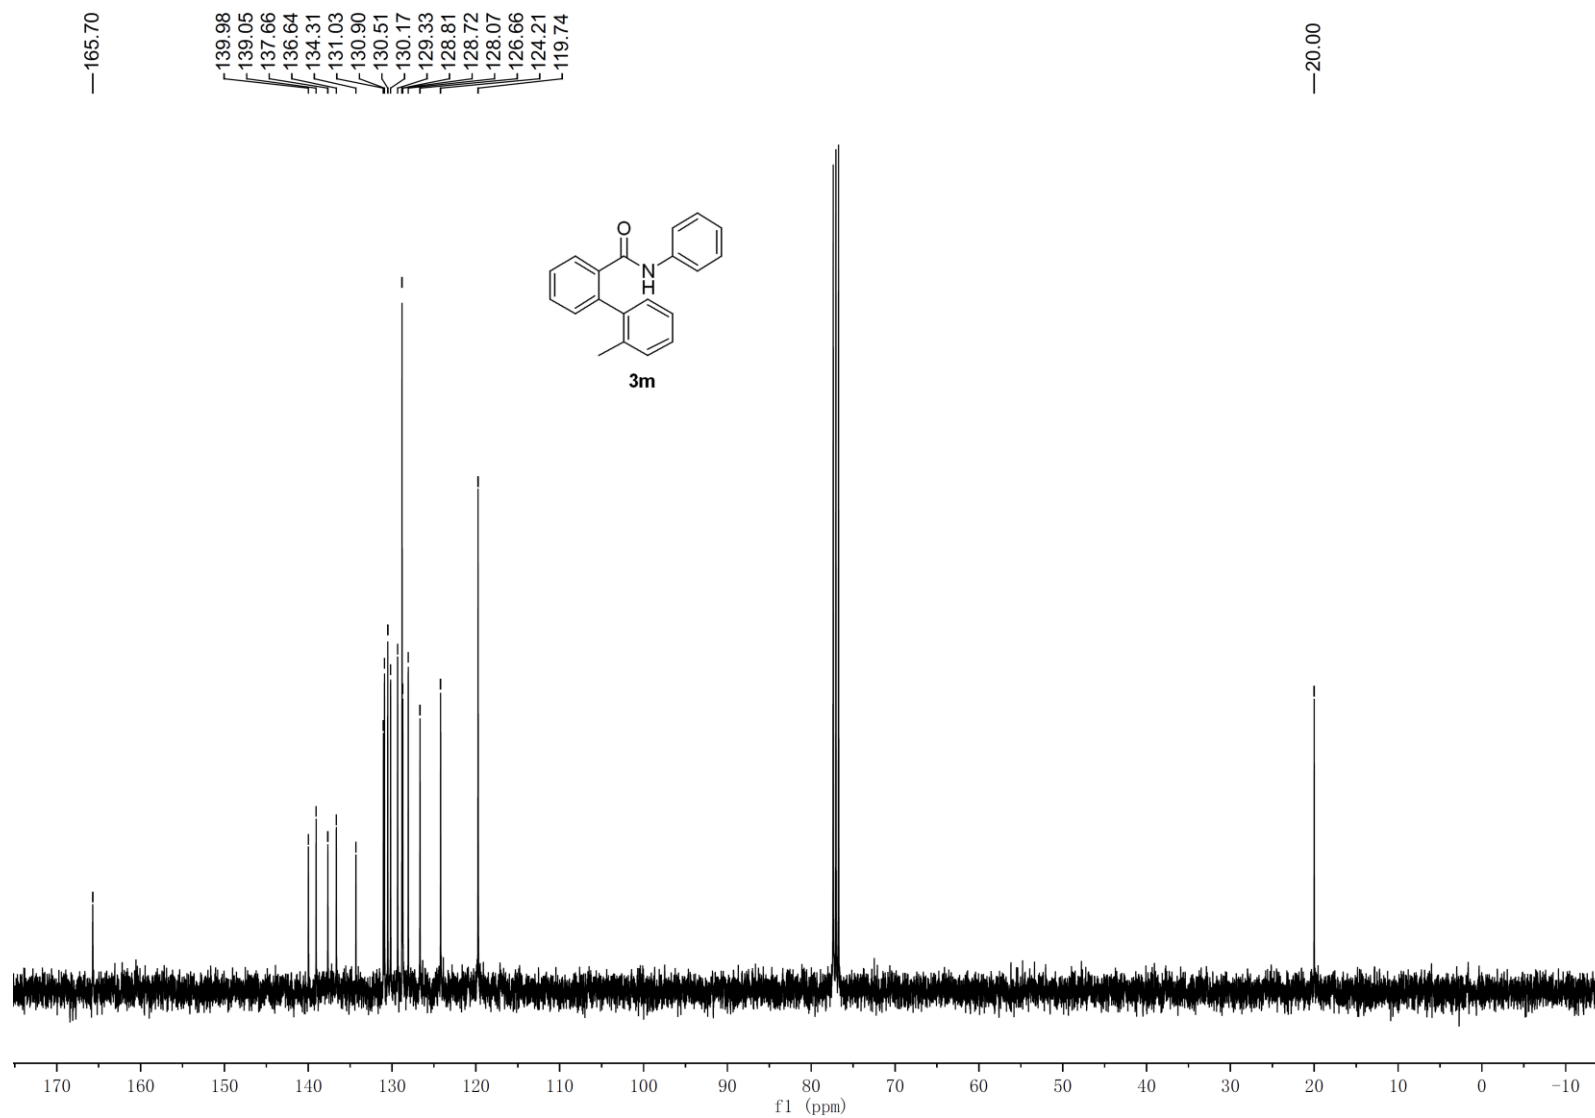

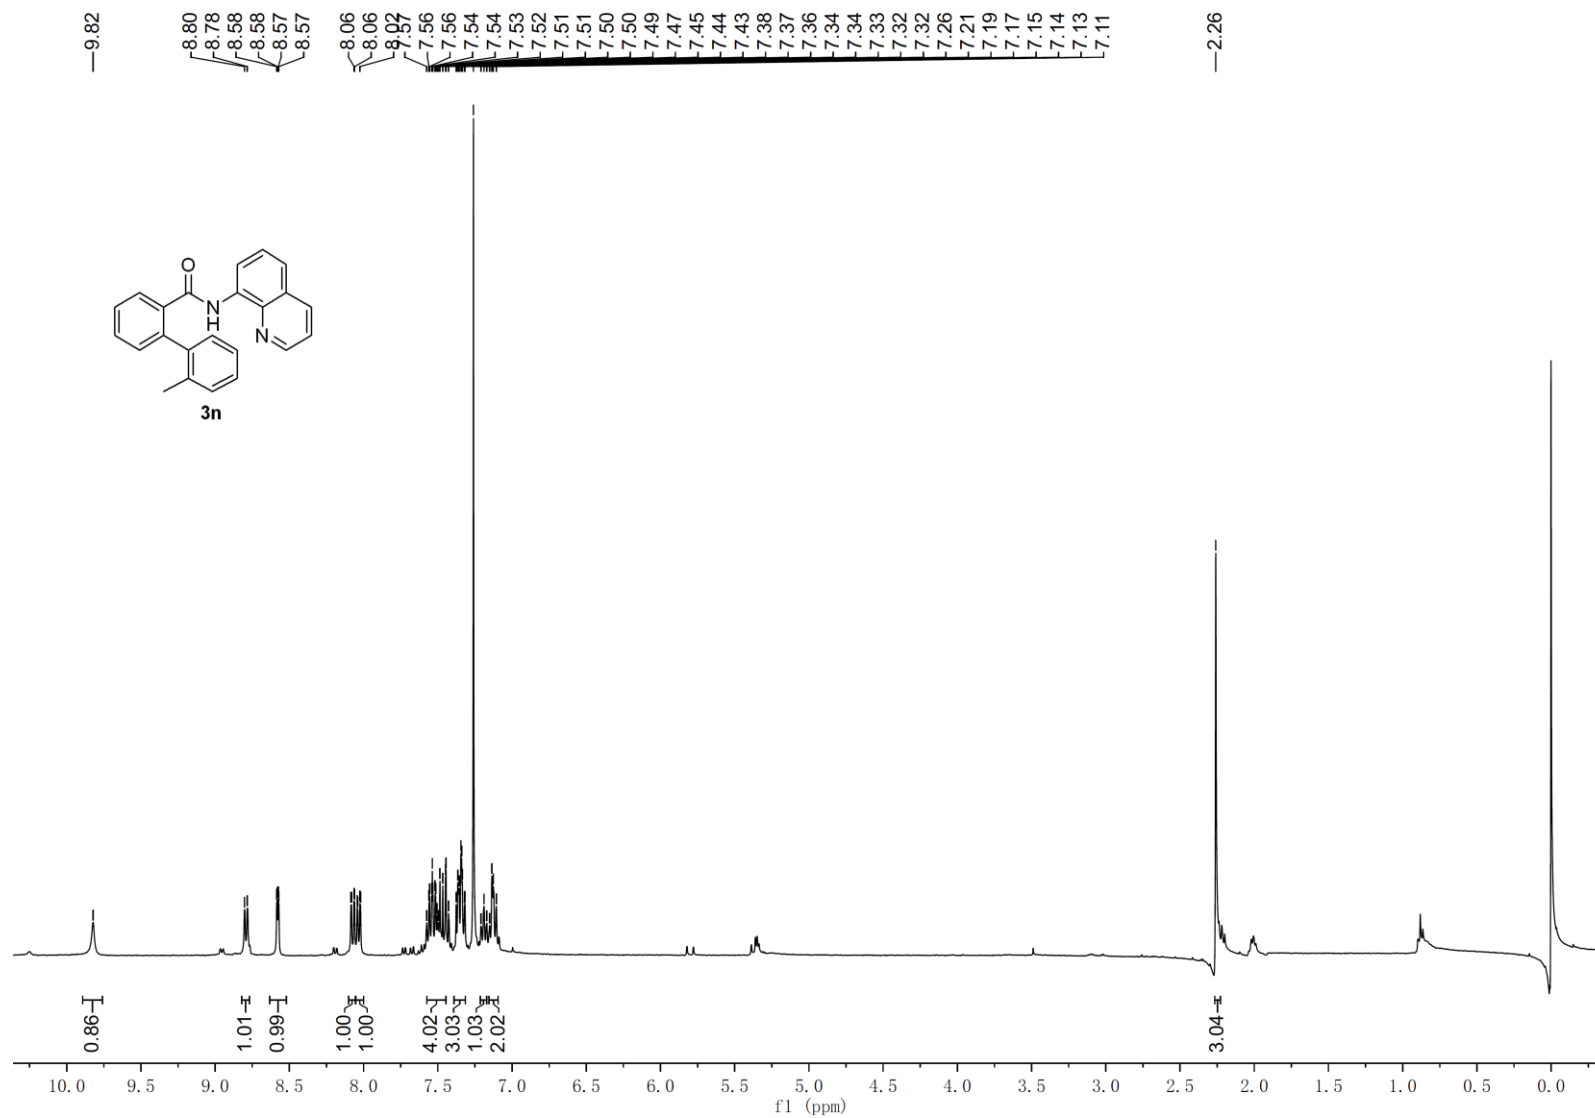

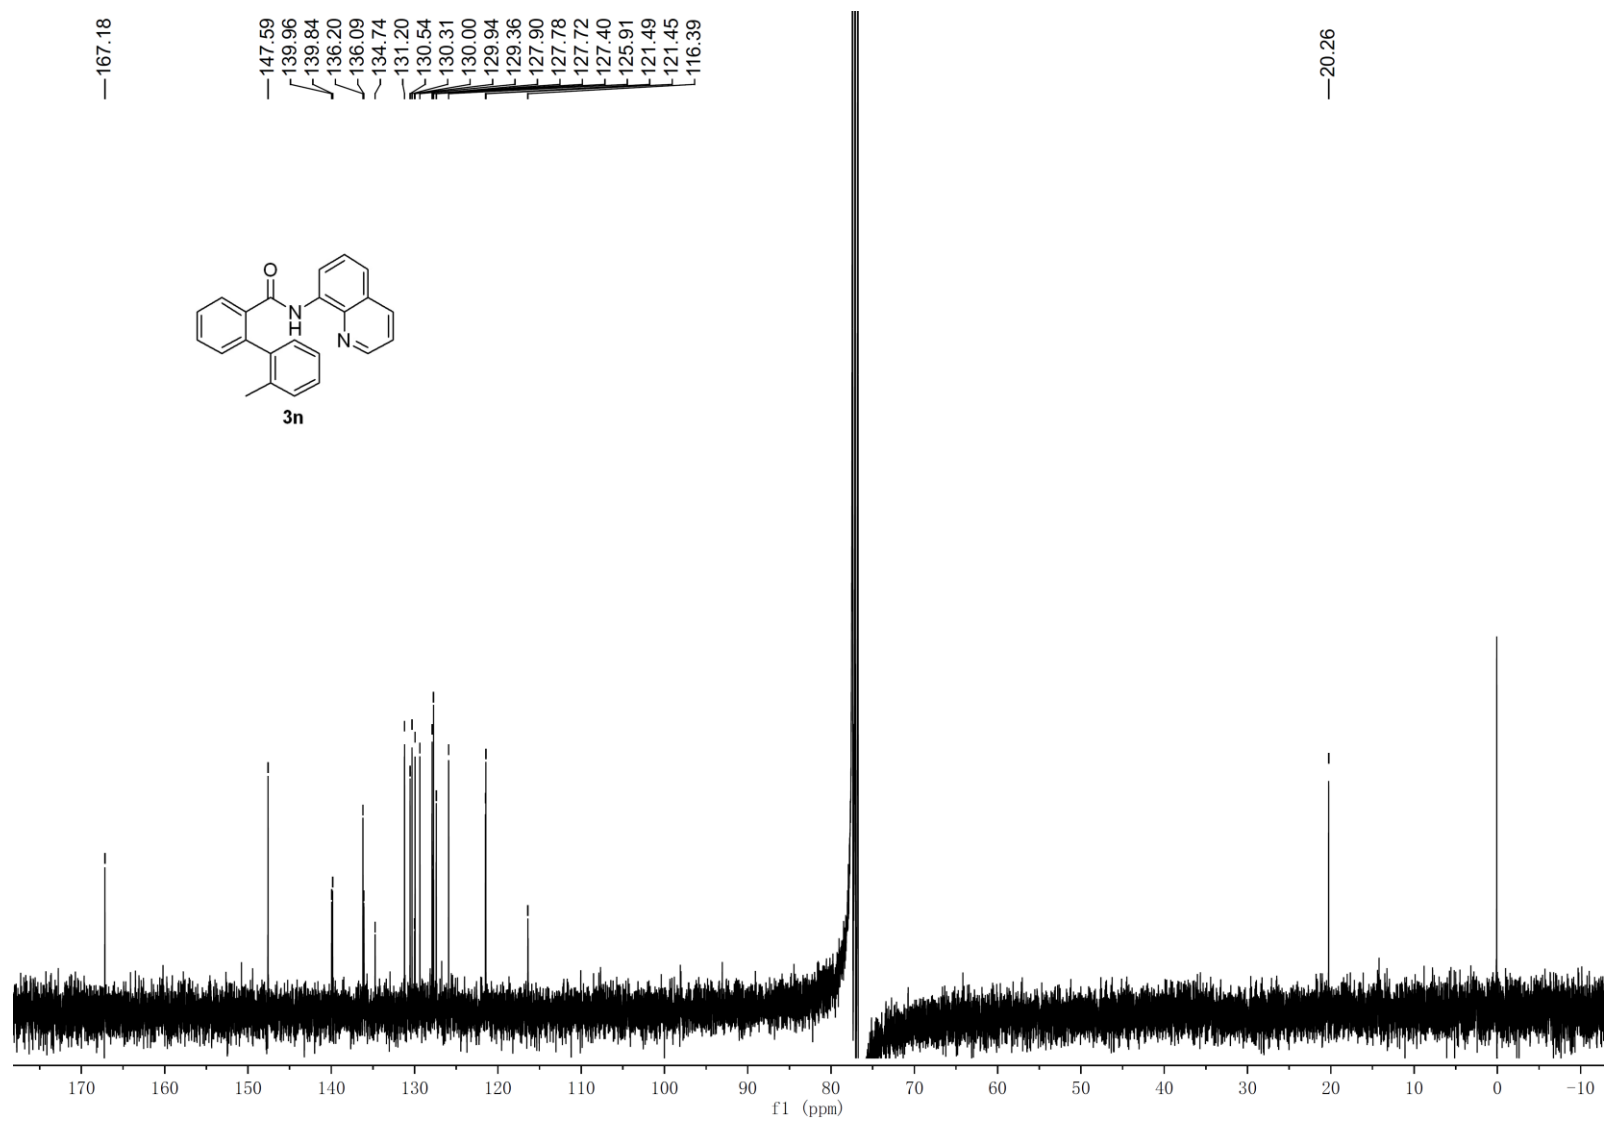

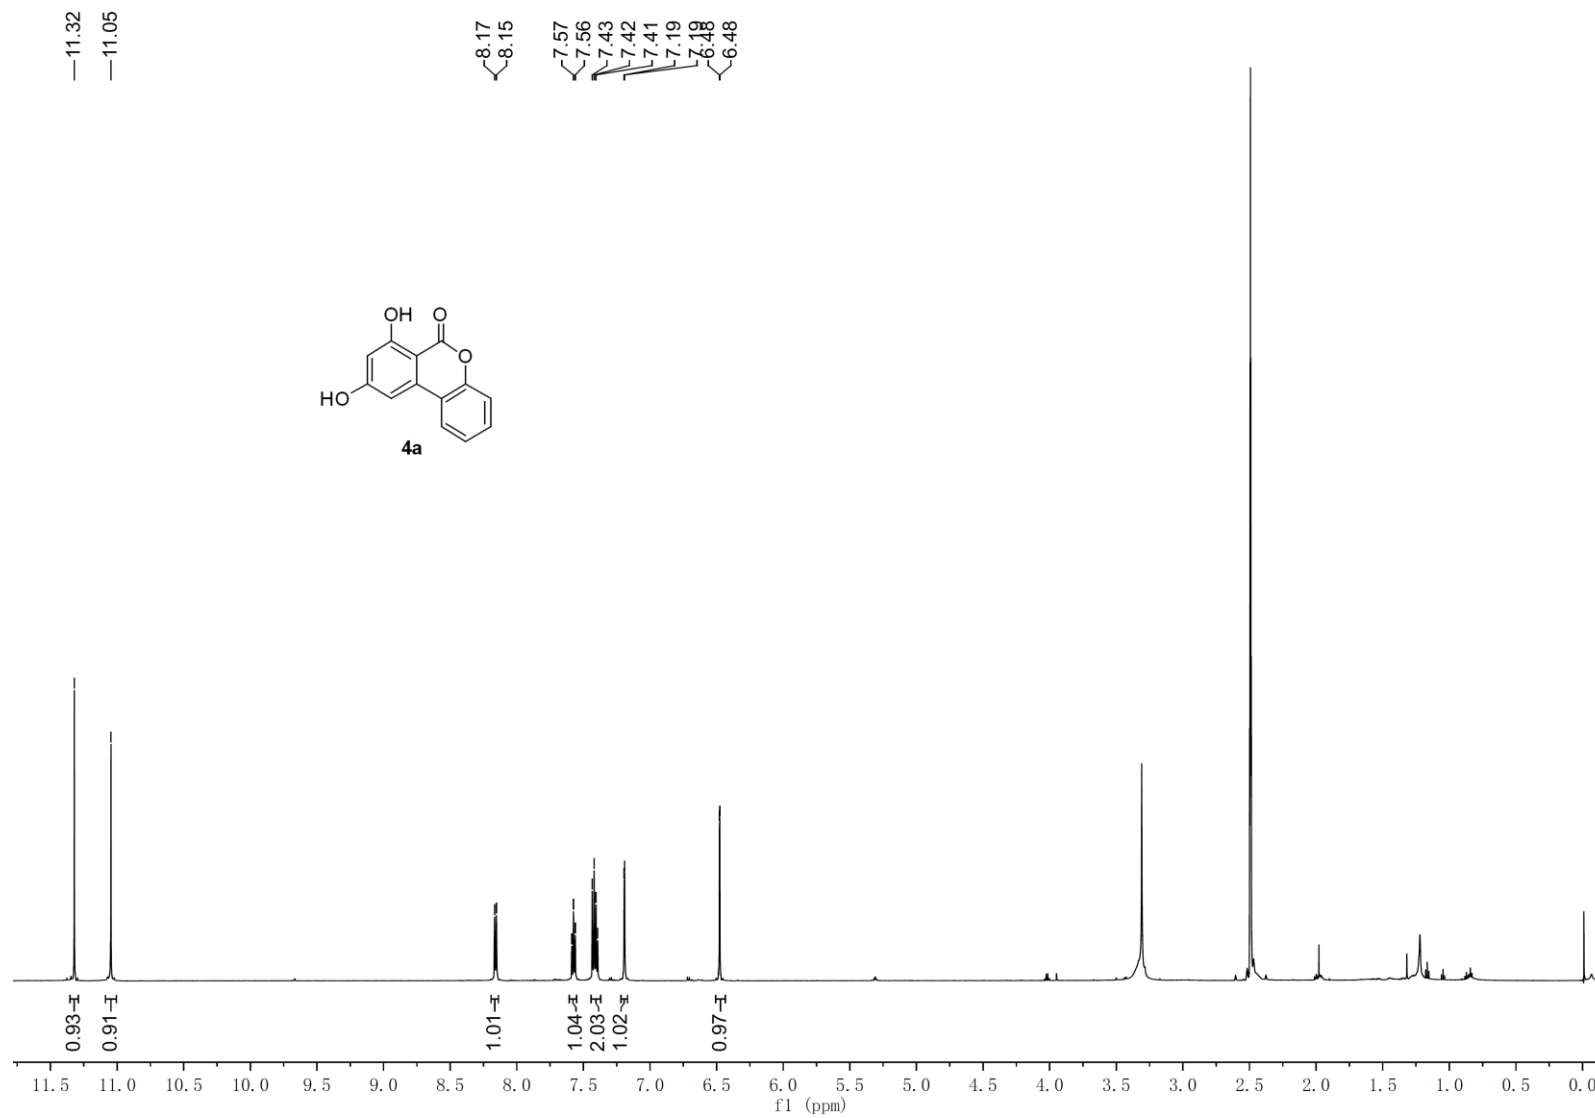

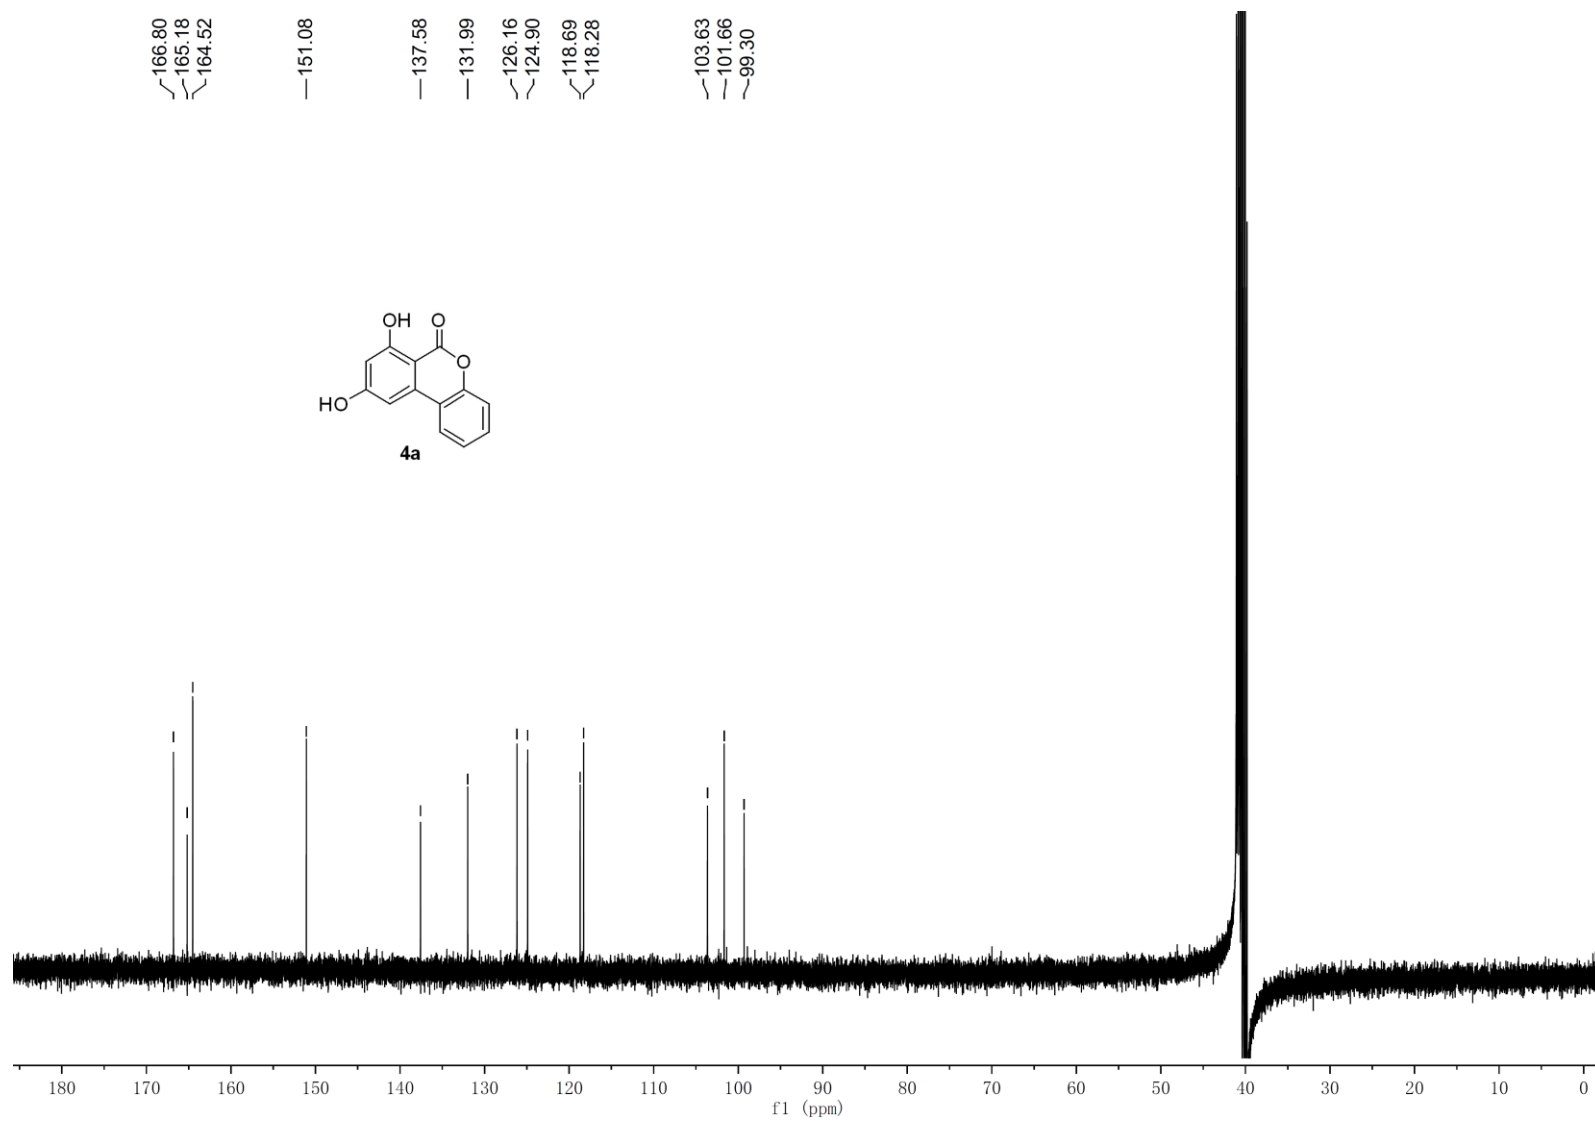



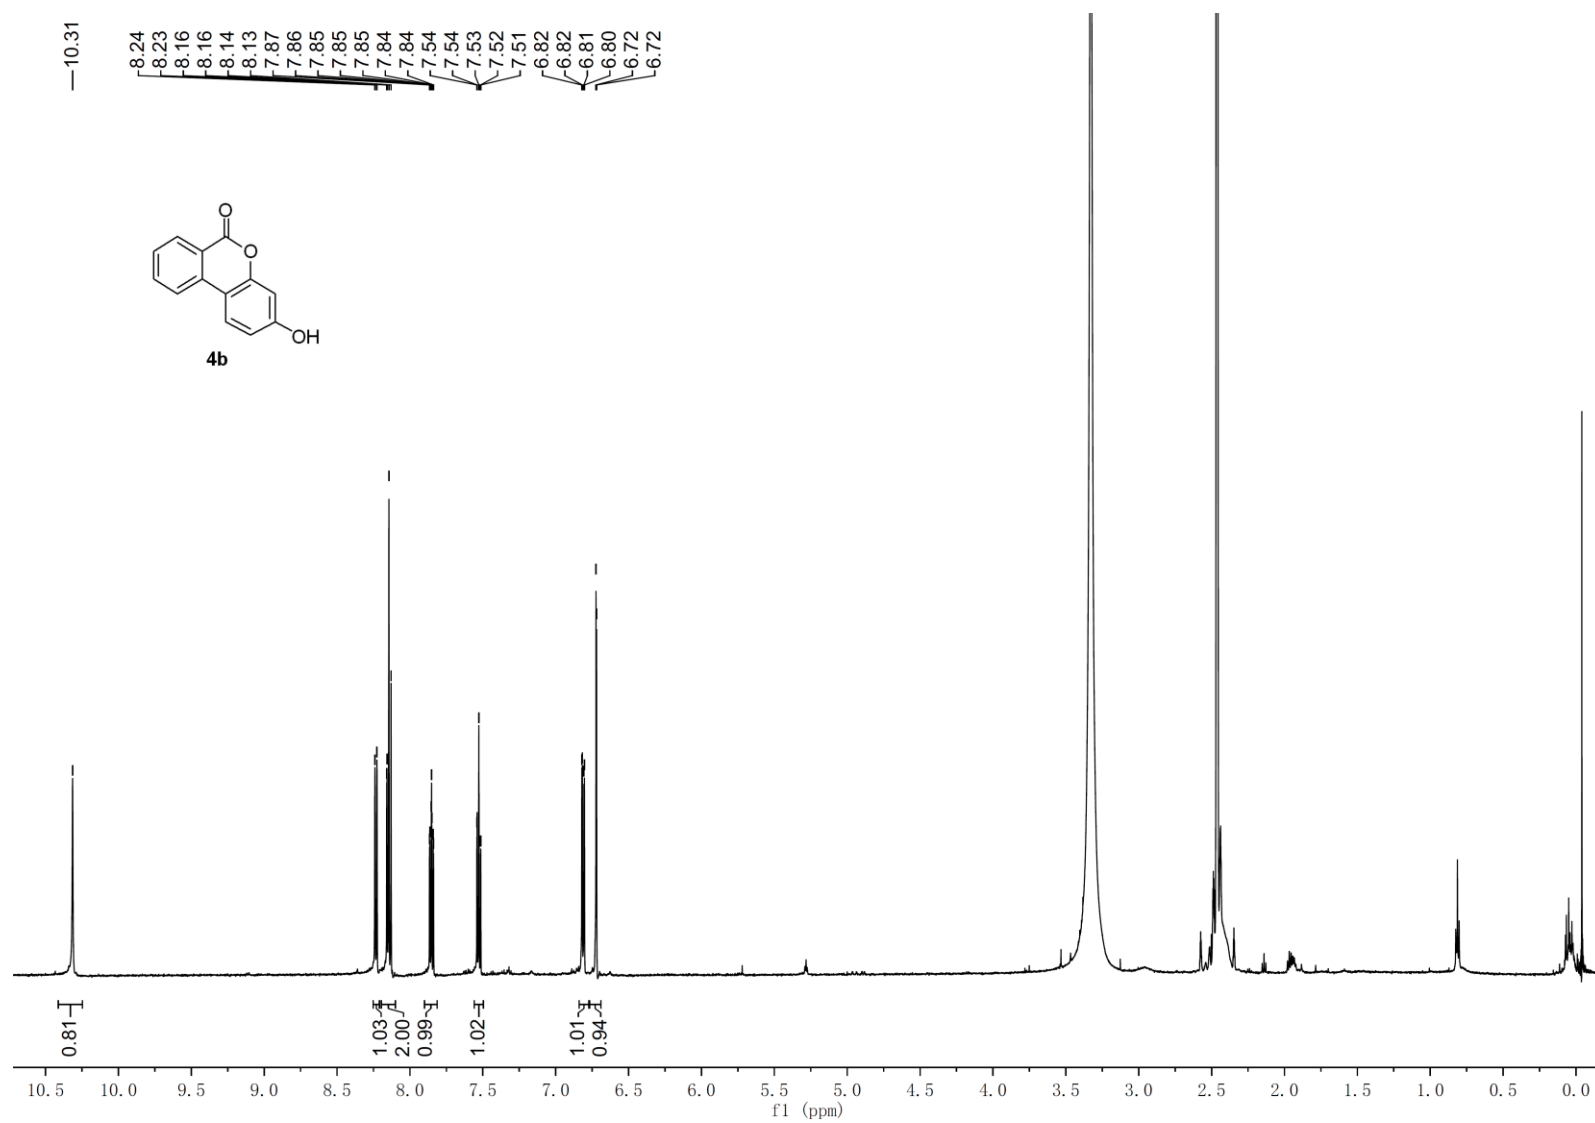

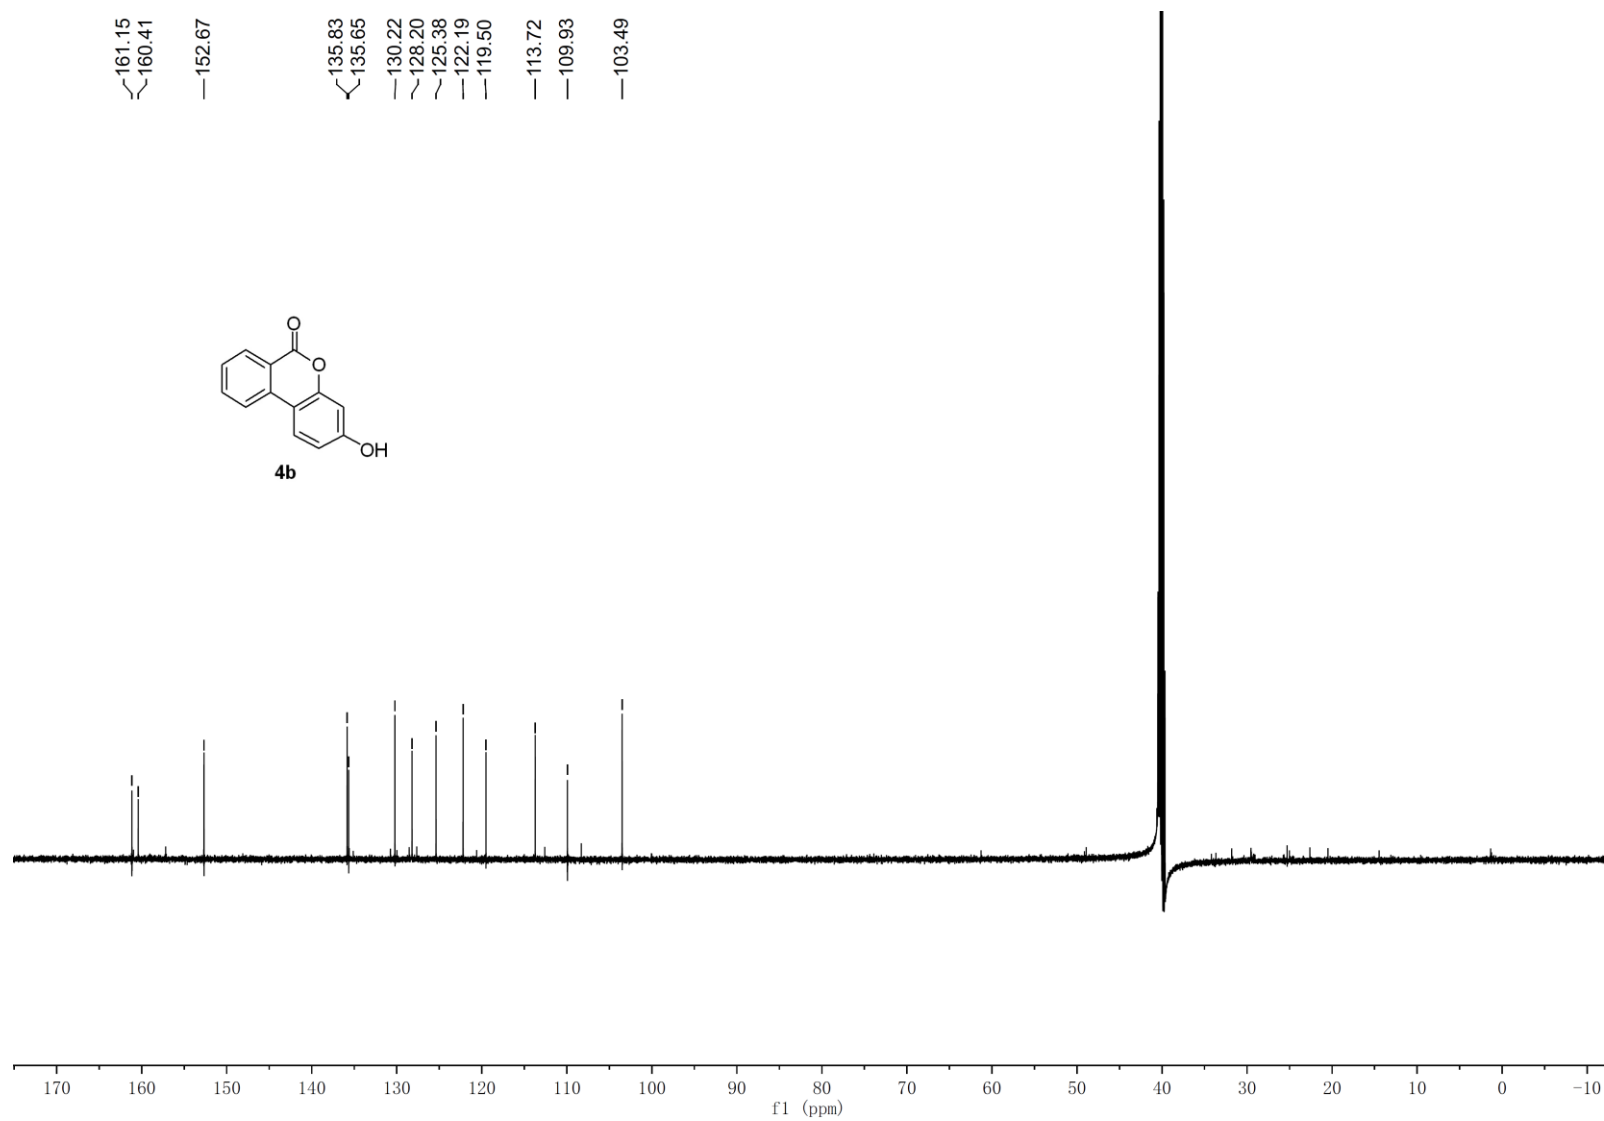

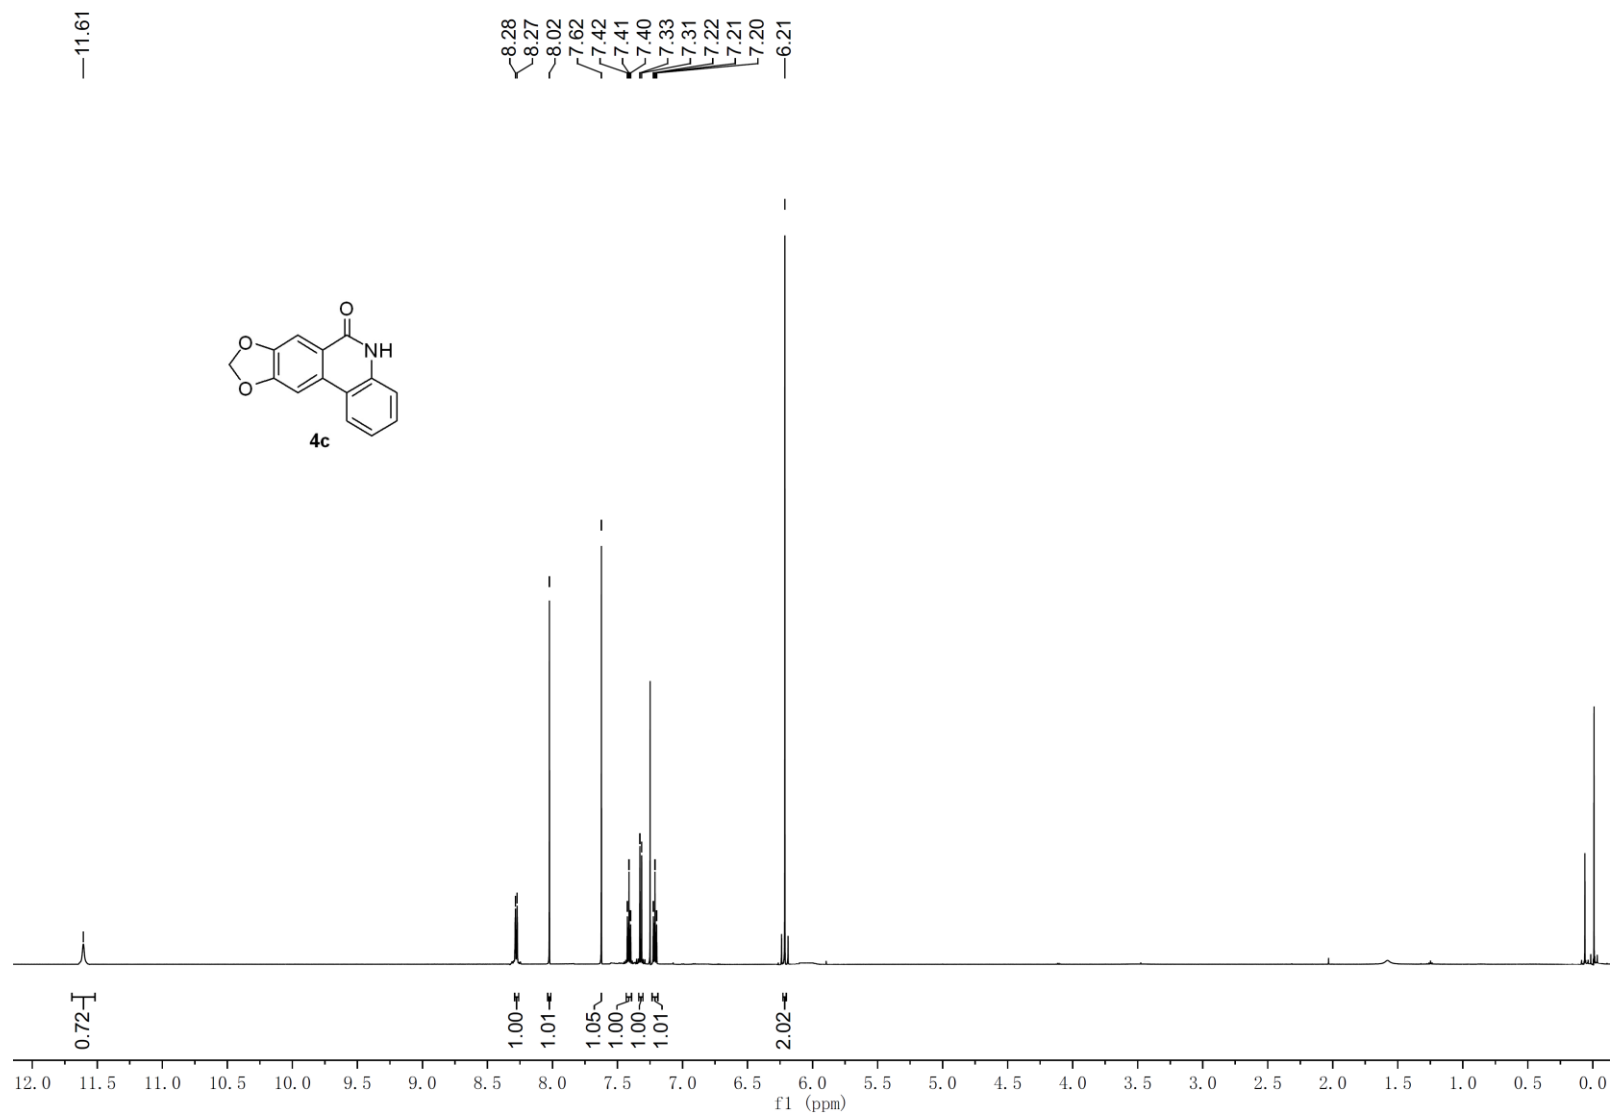

—160.24  
—152.21  
—148.10  
~135.89  
~131.31  
~128.66  
~123.21  
~122.06  
~121.11  
~117.83  
~115.89  
~105.09  
~102.34  
~101.61

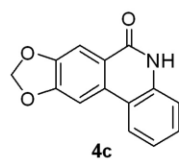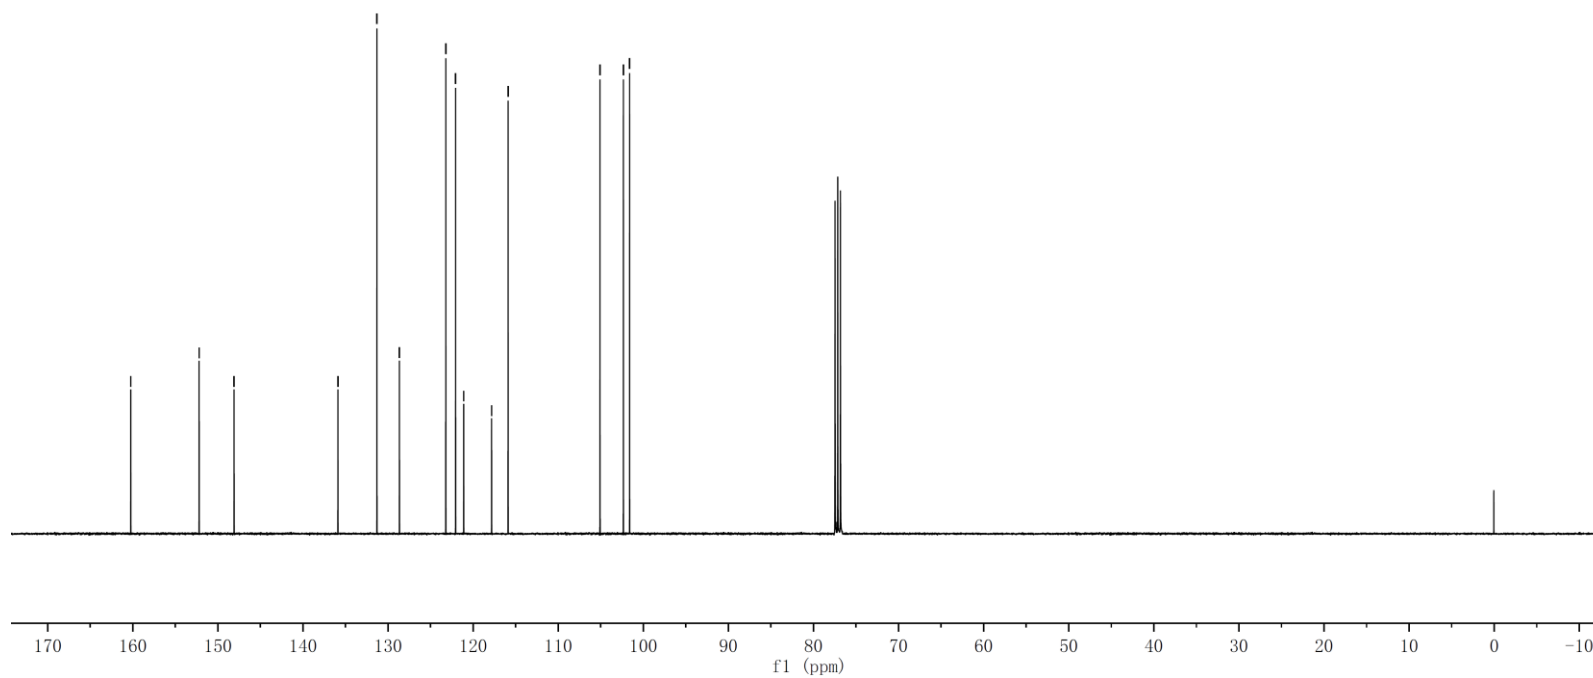

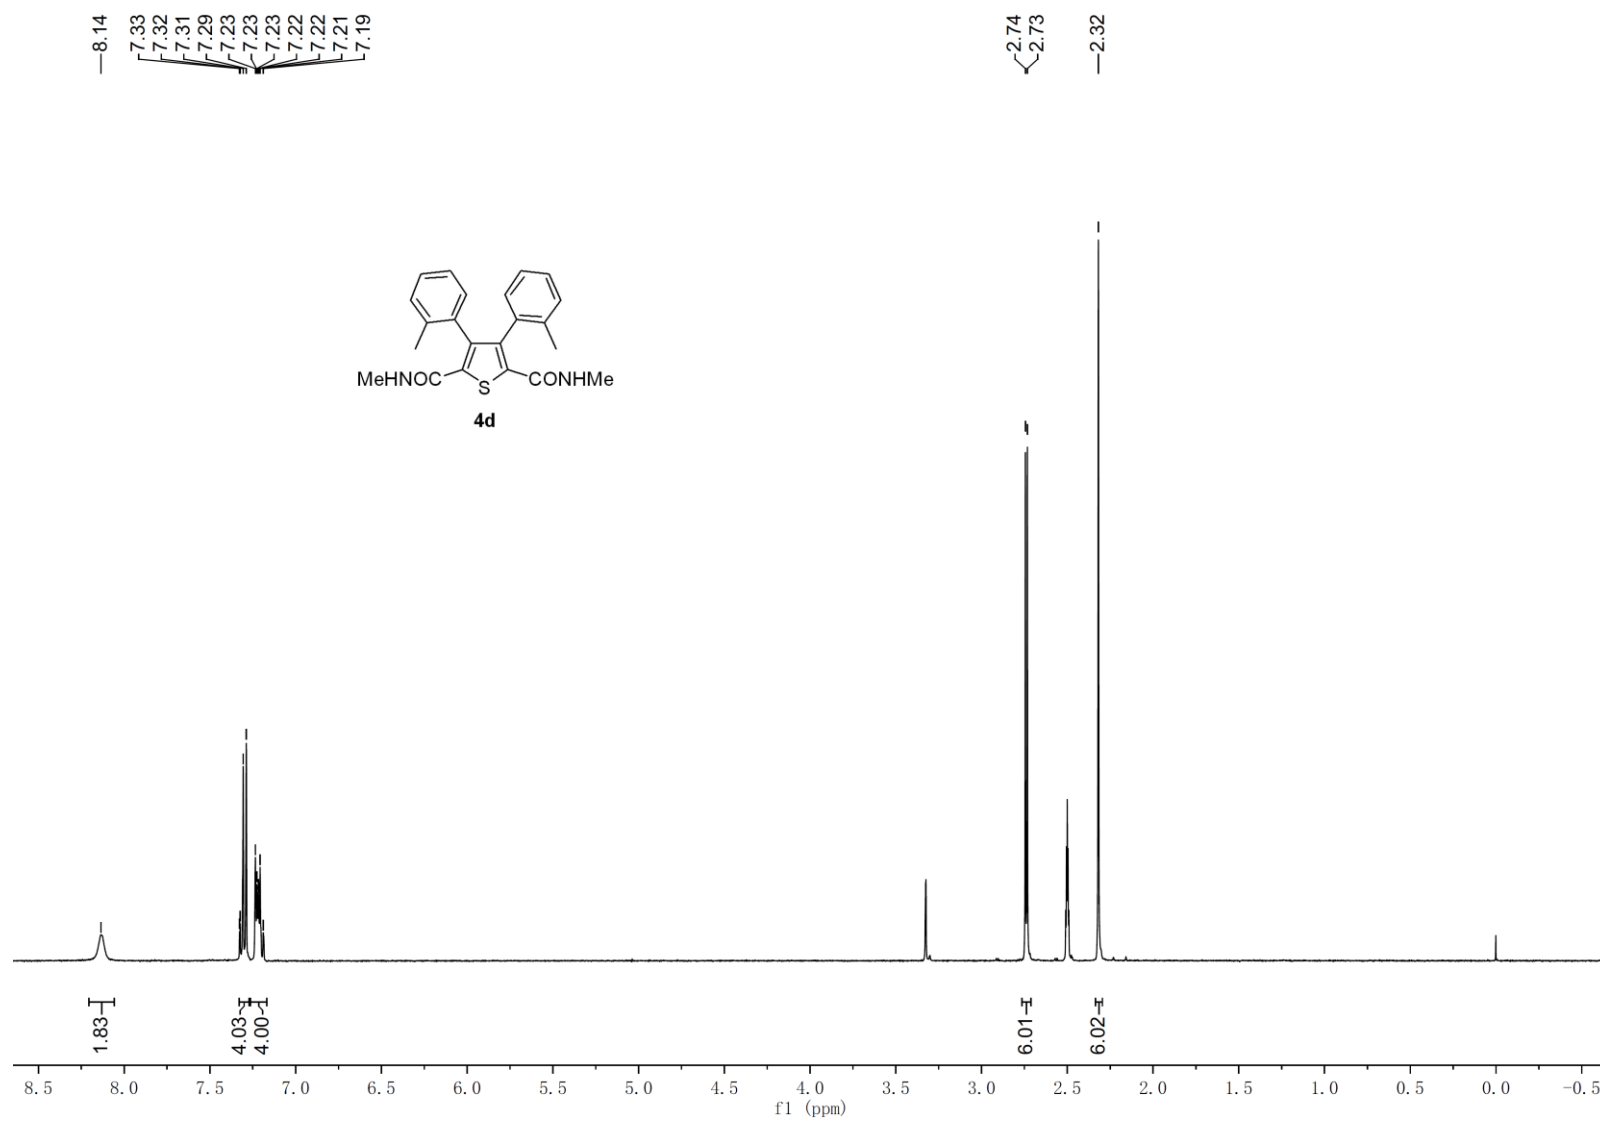

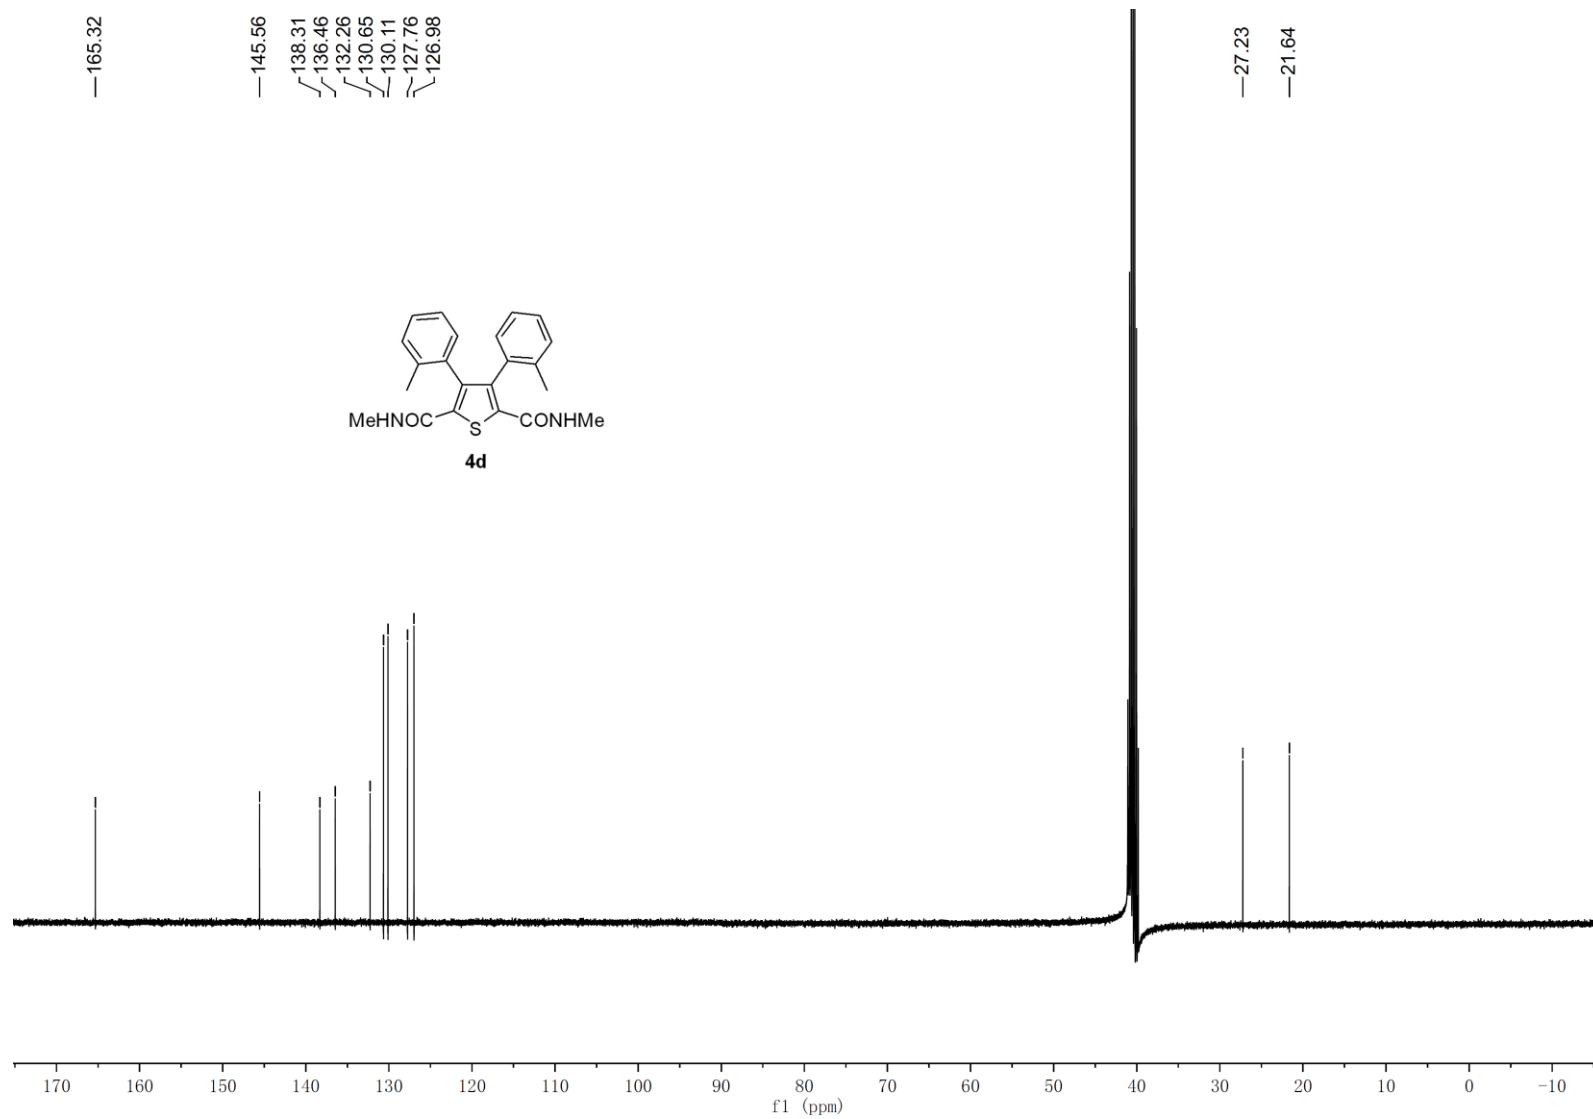

Supplement: Supplementary file 1 [file 16869893]
